# Supplementary material for: Effects of Lactobacillus acidophilus KLDS1.0901 on Proliferation and Apoptosis of Colon Cancer Cells
Source: Front Microbiol. 2022 Feb 11;12:788040. doi: 10.3389/fmicb.2021.788040 (PMC8895954; doi:10.3389/fmicb.2021.788040)
Supplement: Supplementary file 3 [file Data_Sheet_1.XLSX]

## Sheet: Sheet1
	HT-29				caco-2				IEC-6
	12	24	48		12	24	48		12	24	48
1	-0.0066	3.5	5.94		1	5.01	8.98		101.16	100.1	100.7
	-0.0102	3.14	7.07		0.59	4.83	8.4		100.03	100	99.6
	-0.015	3.75	6.52		0.8	4.32	8.09		99.56	99.7	99.31
10	0.013	9.04	15.91		3.01	10.27	14.84		101	100.3	100.5
	0.0166	8.51	15.12		2.59	10.36	15		101.24	100.84	99
	0.0142	8.75	15.35		2.94	10.51	15.62		101.98	101.53	99.6
50	0.0224	12.18	33.51		5.63	12.7	35.73		102	101.5	101.3
	0.0235	10.18	30.98		5.69	12.4	34.84		101.81	100.35	99.32
	0.0195	12.93	33.7		5.02	11.9	33.45		101.5	100.9	100.3
100	0.0328	20.5	42.26		6.47	22.7	45.83		103	103.5	102
	0.0315	18.59	38.96		7.06	24.74	46.03		101.9	103.53	101.5
	0.0338	15.21	40.32		7.11	23.5	47.03		101.5	102.96	100.3
5-Fu	0.2143	30.2	60.03		27.5	48.7	70.5		64.1	39.68	18.46
	0.2119	30.98	62		28.05	48.32	70.03		64.87	40.3	19.97
	0.2038	33.02	61.32		27.1	48	71.08		62.99	40.81	20.18
