# Supplementary material for: Effects of Lactobacillus acidophilus KLDS1.0901 on Proliferation and Apoptosis of Colon Cancer Cells
Source: Front Microbiol. 2022 Feb 11;12:788040. doi: 10.3389/fmicb.2021.788040 (PMC8895954; doi:10.3389/fmicb.2021.788040)
Supplement: Supplementary file 6 [file Data_Sheet_4.XLSX]

## Sheet: sample_vs_control.DEG
Gene_ID	sample_FPKM	control_FPKM	logFC	PValue	sig	entrez_ID	uniprot_ID	symbol	nr	nr_description	KEGG	KEGG_name	KEGG_description	GO-BiologicalProcess	GO-MolecularFunction	GO-CellularComponent
ENSG00000196172	0.21	0.08	1.32519	0.00294764	up	148213	E9PSC0	ZNF681	NP_612143.2	zinc finger protein 681				GO:0006357//regulation of transcription from RNA polymerase II promoter	GO:0000981//RNA polymerase II transcription factor activity, sequence-specific DNA binding;GO:0003677//DNA binding;GO:0046872//metal ion binding	GO:0005634//nucleus
ENSG00000197497	0.06	0.02	1.80081	0.00957924	up	79788	Q9H7R5	ZNF665	NP_001340386.1	zinc finger protein 665 isoform 2	K09228	KRAB	K09228 KRAB; KRAB domain-containing zinc finger protein	GO:0006357//regulation of transcription from RNA polymerase II promoter	GO:0000981//RNA polymerase II transcription factor activity, sequence-specific DNA binding;GO:0003677//DNA binding;GO:0046872//metal ion binding	GO:0005634//nucleus
ENSG00000197566	0.4	0.22	0.83056	0.04887	up	57547	C9J5H1	ZNF624	NP_065838.2	zinc finger protein 624	K09228	KRAB	K09228 KRAB; KRAB domain-containing zinc finger protein	GO:0006357//regulation of transcription from RNA polymerase II promoter	GO:0000981//RNA polymerase II transcription factor activity, sequence-specific DNA binding;GO:0003677//DNA binding;GO:0005515//protein binding;GO:0046872//metal ion binding	GO:0005634//nucleus
ENSG00000198440	0.01	0.03	-1.99972	0.0190701	down	147949	Q96ND8	ZNF583	XP_016881840.1	zinc finger protein 583 isoform X4	K09228	KRAB	K09228 KRAB; KRAB domain-containing zinc finger protein	GO:0006357//regulation of transcription from RNA polymerase II promoter	GO:0000981//RNA polymerase II transcription factor activity, sequence-specific DNA binding;GO:0003677//DNA binding;GO:0046872//metal ion binding	GO:0005634//nucleus
ENSG00000213015	0.15	0.06	1.30771	0.042102	up	51157	Q9UK33	ZNF580	NP_001156895.1	zinc finger protein 580				GO:0001938//positive regulation of endothelial cell proliferation;GO:0002690//positive regulation of leukocyte chemotaxis;GO:0006357//regulation of transcription from RNA polymerase II promoter;GO:0006935//chemotaxis;GO:0006954//inflammatory response;GO:0010595//positive regulation of endothelial cell migration;GO:0010628//positive regulation of gene expression;GO:0032757//positive regulation of …	GO:0000981//RNA polymerase II transcription factor activity, sequence-specific DNA binding;GO:0003677//DNA binding;GO:0005515//protein binding;GO:0046872//metal ion binding	GO:0005634//nucleus
ENSG00000160908	0.01	0.03	-1.72247	0.0313302	down	84124	Q53GI3	ZNF394	NP_001332896.1	zinc finger protein 394 isoform 2	K09229	ZKSCAN	K09229 ZKSCAN; KRAB and SCAN domains-containing zinc finger protein	GO:0006357//regulation of transcription from RNA polymerase II promoter	GO:0000981//RNA polymerase II transcription factor activity, sequence-specific DNA binding;GO:0003677//DNA binding;GO:0005515//protein binding;GO:0046872//metal ion binding	GO:0005634//nucleus
ENSG00000187595	0.06	0.19	-1.70509	0.00244253	down	201181	Q66K41	ZNF385C	NP_001229633.1	zinc finger protein 385C				-	GO:0003676//nucleic acid binding;GO:0005515//protein binding;GO:0008270//zinc ion binding	GO:0005634//nucleus
ENSG00000169131	0.19	0.09	1.12027	0.0354855	up	6940	E5RGC2	ZNF354A	XP_011532947.1	zinc finger protein 354A isoform X2	K09228	KRAB	K09228 KRAB; KRAB domain-containing zinc finger protein	GO:0006357//regulation of transcription from RNA polymerase II promoter;GO:0007605//sensory perception of sound	GO:0000981//RNA polymerase II transcription factor activity, sequence-specific DNA binding;GO:0003677//DNA binding;GO:0046872//metal ion binding	GO:0005634//nucleus;GO:0005730//nucleolus;GO:0005829//cytosol
ENSG00000004838	0	0.03	-3.54882	0.0210559	down	51364	F2Z3M9	ZMYND10	NP_001295308.1	zinc finger MYND domain-containing protein 10 isoform 2				GO:0036158//outer dynein arm assembly;GO:0036159//inner dynein arm assembly;GO:0044458//motile cilium assembly;GO:1905505//positive regulation of motile cilium assembly	GO:0005515//protein binding;GO:0046872//metal ion binding	GO:0005737//cytoplasm;GO:0016324//apical plasma membrane;GO:0034451//centriolar satellite
ENSG00000169946	0.02	0.01	1.74259	0.0470524	up	23414	E7ET52	ZFPM2	NP_001349766.1	zinc finger protein ZFPM2 isoform 3	K17442	ZFPM2	K17442 ZFPM2; zinc finger protein ZFPM2	GO:0000122//negative regulation of transcription from RNA polymerase II promoter;GO:0001570//vasculogenesis;GO:0001701//in utero embryonic development;GO:0003148//outflow tract septum morphogenesis;GO:0003221//right ventricular cardiac muscle tissue morphogenesis;GO:0007506//gonadal mesoderm development;GO:0007507//heart development;GO:0007596//blood coagulation;GO:0030324//lung development;GO:00…	GO:0000981//RNA polymerase II transcription factor activity, sequence-specific DNA binding;GO:0001085//RNA polymerase II transcription factor binding;GO:0003677//DNA binding;GO:0003713//transcription coactivator activity;GO:0003714//transcription corepressor activity;GO:0005515//protein binding;GO:0008134//transcription factor binding;GO:0008270//zinc ion binding	GO:0005634//nucleus;GO:0005654//nucleoplasm;GO:0005737//cytoplasm
ENSG00000136866	0.02	0.01	1.7437	0.0469117	up	7539	Q9Y6Q3	ZFP37	NP_001269447.1	zinc finger protein 37 homolog isoform 2	K09228	KRAB	K09228 KRAB; KRAB domain-containing zinc finger protein	GO:0006355//regulation of transcription, DNA-templated;GO:0006357//regulation of transcription from RNA polymerase II promoter	GO:0000981//RNA polymerase II transcription factor activity, sequence-specific DNA binding;GO:0003677//DNA binding;GO:0003700//transcription factor activity, sequence-specific DNA binding;GO:0008270//zinc ion binding	GO:0005634//nucleus
ENSG00000188818	0.68	1.3	-0.941378	0.0164926	down	79844	A0A0A0MSN5	ZDHHC11	XP_024301985.1	probable palmitoyltransferase ZDHHC11 isoform X16	K20027	ZDHHC1_11	K20027 ZDHHC1_11; palmitoyltransferase ZDHHC1/11 [EC:2.3.1.225]	GO:0006612//protein targeting to membrane;GO:0018230//peptidyl-L-cysteine S-palmitoylation	GO:0019706//protein-cysteine S-palmitoyltransferase activity	GO:0005783//endoplasmic reticulum;GO:0005794//Golgi apparatus;GO:0016021//integral component of membrane
XLOC_055357	0.17	0.02	3.28833	8.89656e-05	up	23144	H0YEY2	ZC3H3	XP_011515246.1	zinc finger CCCH domain-containing protein 3 isoform X4				GO:0006357//regulation of transcription from RNA polymerase II promoter;GO:0031124//mRNA 3'-end processing;GO:0032927//positive regulation of activin receptor signaling pathway;GO:0051028//mRNA transport;GO:1900363//regulation of mRNA polyadenylation
ENSG00000104427	0.04	0	3.03954	0.00396988	up	51101	H0YAP0	ZC2HC1A	NP_057094.2	zinc finger C2HC domain-containing protein 1A isoform 1				-	GO:0005515//protein binding;GO:0046872//metal ion binding	-
ENSG00000174282	0.01	0	4.08212	0.00543265	up	57659	Q9P1Z0	ZBTB4	XP_011522274.1	zinc finger and BTB domain-containing protein 4 isoform X1	K10491	ZBTB4	K10491 ZBTB4; zinc finger and BTB domain-containing protein 4
ENSG00000146839	0	0.01	-2.61552	0.0186814	down	7455	F5H0T8	ZAN	XP_016868070.1	zonadhesin isoform X1				GO:0007339//binding of sperm to zona pellucida;GO:0098609//cell-cell adhesion	-	GO:0005886//plasma membrane;GO:0016021//integral component of membrane
ENSG00000163092	0	0	4.08239	0.00542958	up	129446	A4UGR9	XIRP2	XP_016858798.1	xin actin-binding repeat-containing protein 2 isoform X1				GO:0003281//ventricular septum development;GO:0008150//biological_process;GO:0030036//actin cytoskeleton organization;GO:0045216//cell-cell junction organization;GO:0055008//cardiac muscle tissue morphogenesis	GO:0051015//actin filament binding;GO:0051393//alpha-actinin binding	GO:0001725//stress fiber;GO:0005925//focal adhesion;GO:0030018//Z disc
ENSG00000173578	0	0.02	-2.78008	0.0107624	down	2829	Q689E2	XCR1	XP_016861690.1	chemokine XC receptor 1 isoform X1	K04193	XCR1	K04193 XCR1; XC chemokine receptor 1	GO:0006935//chemotaxis;GO:0006954//inflammatory response;GO:0006955//immune response;GO:0007186//G-protein coupled receptor signaling pathway;GO:0007187//G-protein coupled receptor signaling pathway, coupled to cyclic nucleotide second messenger;GO:0007204//positive regulation of cytosolic calcium ion concentration;GO:0019722//calcium-mediated signaling;GO:0060326//cell chemotaxis;GO:0070098//che…	GO:0004950//chemokine receptor activity;GO:0016493//C-C chemokine receptor activity;GO:0019956//chemokine binding;GO:0019957//C-C chemokine binding	GO:0005886//plasma membrane;GO:0005887//integral component of plasma membrane;GO:0009897//external side of plasma membrane
ENSG00000204382	0.6	0.26	1.21739	0.0274072	up	653067	Q9HD64	XAGE1B	XP_016885235.1	X antigen family member 1 isoform X1				-	GO:0005515//protein binding	-
ENSG00000047644	0.08	0.03	1.45999	0.00714523	up	55841	Q9ULE0	WWC3	NP_056506.2	protein WWC3				GO:0000122//negative regulation of transcription from RNA polymerase II promoter;GO:0035331//negative regulation of hippo signaling;GO:0046621//negative regulation of organ growth	GO:0019900//kinase binding;GO:0060090//binding, bridging	GO:0005829//cytosol
ENSG00000126562	0.1	0.26	-1.4154	0.00221904	down	65266	K7EPB3	WNK4	XP_016880455.1	serine/threonine-protein kinase WNK4 isoform X2	K08867	WNK	K08867 WNK; WNK lysine deficient protein kinase [EC:2.7.11.1]	GO:0006468//protein phosphorylation;GO:0006811//ion transport;GO:0006821//chloride transport;GO:0008104//protein localization;GO:0010766//negative regulation of sodium ion transport;GO:0032414//positive regulation of ion transmembrane transporter activity;GO:0035556//intracellular signal transduction;GO:0050794//regulation of cellular process;GO:0050801//ion homeostasis;GO:0070294//renal sodium i…	GO:0004674//protein serine/threonine kinase activity;GO:0005515//protein binding;GO:0005524//ATP binding;GO:0019869//chloride channel inhibitor activity;GO:0019870//potassium channel inhibitor activity	GO:0005737//cytoplasm;GO:0005829//cytosol;GO:0005923//bicellular tight junction;GO:0016020//membrane
ENSG00000124116	3.8	2.21	0.785183	0.0475576	up	140686	F2Z2G5	WFDC3	NP_542181.1	WAP four-disulfide core domain protein 3 precursor	K23637	WFDC3	K23637 WFDC3; WAP four-disulfide core domain protein 3	GO:0010951//negative regulation of endopeptidase activity	GO:0004867//serine-type endopeptidase inhibitor activity	GO:0005576//extracellular region
ENSG00000136918	0.23	0.09	1.33322	0.0320437	up	401551	A0A087X0J1	WDR38	XP_024303313.1	WD repeat-containing protein 38 isoform X2
ENSG00000019102	0.57	1.81	-1.66012	0.000119714	down	23584	Q96IQ7	VSIG2	NP_001316849.1	V-set and immunoglobulin domain-containing protein 2 isoform 2 precursor				-	-	GO:0005887//integral component of plasma membrane;GO:0016020//membrane
ENSG00000112299	0.03	0	4.63856	0.000800617	up	8876	O95497	VNN1	NP_004657.2	pantetheinase precursor	K08069	VNN	K08069 VNN; pantetheine hydrolase [EC:3.5.1.92]	GO:0002526//acute inflammatory response;GO:0002544//chronic inflammatory response;GO:0006954//inflammatory response;GO:0006979//response to oxidative stress;GO:0015939//pantothenate metabolic process;GO:0033089//positive regulation of T cell differentiation in thymus;GO:0043312//neutrophil degranulation;GO:0045087//innate immune response;GO:0098609//cell-cell adhesion;GO:1902176//negative regulat…	GO:0017159//pantetheine hydrolase activity	GO:0005576//extracellular region;GO:0005886//plasma membrane;GO:0016021//integral component of membrane;GO:0031225//anchored component of membrane;GO:0035577//azurophil granule membrane
XLOC_055133	0.11	0.77	-2.80356	6.20314e-07	down	57176	A2ABL6	VARS2	NP_001161205.1	valine--tRNA ligase, mitochondrial isoform 3	K01873	VARS	K01873 VARS; valyl-tRNA synthetase [EC:6.1.1.9]	GO:0006438//valyl-tRNA aminoacylation
XLOC_055171	0.11	0.22	-1.09936	0.0106499	down	57176	A2ABL6	VARS2	NP_001161205.1	valine--tRNA ligase, mitochondrial isoform 3	K01873	VARS	K01873 VARS; valyl-tRNA synthetase [EC:6.1.1.9]	GO:0006438//valyl-tRNA aminoacylation
ENSG00000161133	0.09	0.02	1.97164	0.0432743	up	373856	Q3LFD5	USP41	XP_016884653.1	putative ubiquitin carboxyl-terminal hydrolase 41	K11846	USP18_41	K11846 USP18_41; ubiquitin carboxyl-terminal hydrolase 18/41 [EC:3.4.19.12]	GO:0006511//ubiquitin-dependent protein catabolic process;GO:0016579//protein deubiquitination;GO:0031647//regulation of protein stability	GO:0004197//cysteine-type endopeptidase activity;GO:0004843//thiol-dependent ubiquitin-specific protease activity	GO:0005829//cytosol
ENSG00000183463	0.05	0	3.53928	0.0217399	up	646625	A6NGE7	URAD	NP_001099047.1	putative 2-oxo-4-hydroxy-4-carboxy-5-ureidoimidazoline decarboxylase	K13485	PRHOXNB	K13485 PRHOXNB; 2-oxo-4-hydroxy-4-carboxy-5-ureidoimidazoline decarboxylase [EC:4.1.1.97]	GO:0006144//purine nucleobase metabolic process;GO:0008150//biological_process;GO:0019428//allantoin biosynthetic process;GO:0019628//urate catabolic process	GO:0016831//carboxy-lyase activity	GO:0005575//cellular_component;GO:0005777//peroxisome
ENSG00000114638	0	0.09	-5.36524	2.34675e-05	down	7348	C9J9M7	UPK1B	NP_008883.2	uroplakin-1b	K17347	UPK1	K17347 UPK1; uroplakin-1	GO:0009617//response to bacterium;GO:0030855//epithelial cell differentiation	GO:0005198//structural molecule activity	GO:0005887//integral component of plasma membrane;GO:0016021//integral component of membrane;GO:0070062//extracellular exosome
ENSG00000143222	0	0.08	-4.09218	0.00519212	down	51506	Q9Y3C8	UFC1	XP_016856939.1	ubiquitin-fold modifier-conjugating enzyme 1 isoform X1	K12165	UFC1	K12165 UFC1; ufm1-conjugating enzyme 1	GO:0007420//brain development;GO:0034976//response to endoplasmic reticulum stress;GO:0071569//protein ufmylation;GO:1990592//protein K69-linked ufmylation	GO:0005515//protein binding;GO:0071568//UFM1 transferase activity	GO:0070062//extracellular exosome
ENSG00000174521	0.02	0.08	-1.82195	0.0213236	down	148014	Q8N6N2	TTC9B	XP_016881857.1	tetratricopeptide repeat protein 9B isoform X1				GO:0008150//biological_process	GO:0003674//molecular_function	GO:0005575//cellular_component
ENSG00000104522	0.41	0.86	-1.07787	0.0106878	down	7264	H0YE90	TSTA3	NP_003304.1	GDP-L-fucose synthase isoform 2	K02377	TSTA3	K02377 TSTA3; GDP-L-fucose synthase [EC:1.1.1.271]
XLOC_054952	0.39	0.18	1.07805	0.0410575	up	79042	E7EQB3	TSEN34	XP_011525596.1	tRNA-splicing endonuclease subunit Sen34 isoform X2	K15323	TSEN34	K15323 TSEN34; tRNA-splicing endonuclease subunit Sen34 [EC:4.6.1.16]
XLOC_055179	0	0.04	-3.55117	0.0209812	down	5987	A0A1U9X8R9	TRIM27	NP_006501.1	zinc finger protein RFP	K12009	TRIM27	K12009 TRIM27; tripartite motif-containing protein 27 [EC:2.3.2.27]
ENSG00000124731	0.05	0.01	2.08086	0.0136409	up	54210	Q9NP99	TREM1	XP_011512999.1	triggering receptor expressed on myeloid cells 1 isoform X5	K14362	TREM1	K14362 TREM1; triggering receptor expressed on myeloid cells 1	GO:0002526//acute inflammatory response;GO:0006959//humoral immune response;GO:0035556//intracellular signal transduction;GO:0045087//innate immune response;GO:0050776//regulation of immune response;GO:0050900//leukocyte migration	GO:0038023//signaling receptor activity;GO:0097110//scaffold protein binding	GO:0005576//extracellular region;GO:0005886//plasma membrane;GO:0016021//integral component of membrane
XLOC_054993	0	0.03	-3.54764	0.0210937	down	7189	Q9Y4K3	TRAF6	XP_016873709.1	TNF receptor-associated factor 6 isoform X1	K03175	TRAF6	K03175 TRAF6; TNF receptor-associated factor 6 [EC:2.3.2.27]	GO:0000122//negative regulation of transcription from RNA polymerase II promoter;GO:0000187//activation of MAPK activity;GO:0000209//protein polyubiquitination;GO:0001503//ossification;GO:0001701//in utero embryonic development;GO:0001843//neural tube closure;GO:0002223//stimulatory C-type lectin receptor signaling pathway;GO:0002224//toll-like receptor signaling pathway;GO:0002726//positive regu…
ENSG00000009790	0	0.02	-2.43227	0.0325038	down	80342	H0YF09	TRAF3IP3	XP_005273336.1	TRAF3-interacting JNK-activating modulator isoform X5				-	GO:0005515//protein binding	GO:0016021//integral component of membrane
ENSG00000131746	0.78	0.42	0.894826	0.0258982	up	84951	J3QLA4	TNS4	XP_016880726.1	tensin-4 isoform X3	K18080	TNS	K18080 TNS; tensin	GO:0006915//apoptotic process;GO:0008104//protein localization	GO:0003779//actin binding;GO:0005515//protein binding	GO:0005829//cytosol;GO:0005856//cytoskeleton;GO:0005925//focal adhesion
ENSG00000125735	0.01	0.03	-2.13552	0.0257145	down	8740	O43557	TNFSF14	NP_742011.2	tumor necrosis factor ligand superfamily member 14 isoform 2	K05477	TNFSF14	K05477 TNFSF14; tumor necrosis factor ligand superfamily member 14	GO:0006915//apoptotic process;GO:0006955//immune response;GO:0007165//signal transduction;GO:0010820//positive regulation of T cell chemotaxis;GO:0031295//T cell costimulation;GO:0033209//tumor necrosis factor-mediated signaling pathway;GO:0042098//T cell proliferation;GO:0042110//T cell activation;GO:0043029//T cell homeostasis;GO:0043154//negative regulation of cysteine-type endopeptidase activ…	GO:0005102//receptor binding;GO:0005125//cytokine activity;GO:0005164//tumor necrosis factor receptor binding;GO:0005515//protein binding;GO:0043027//cysteine-type endopeptidase inhibitor activity involved in apoptotic process	GO:0005615//extracellular space;GO:0005737//cytoplasm;GO:0005886//plasma membrane;GO:0016021//integral component of membrane
ENSG00000137648	0	0.02	-2.78067	0.0107451	down	56649	A0A087WTU6	TMPRSS4	NP_001277025.1	transmembrane protease serine 4 isoform 7	K09635	TMPRSS4	K09635 TMPRSS4; transmembrane protease serine 4 [EC:3.4.21.-]	GO:0006508//proteolysis;GO:0006897//endocytosis;GO:0009611//response to wounding;GO:0010468//regulation of gene expression;GO:0045967//negative regulation of growth rate	GO:0004252//serine-type endopeptidase activity;GO:0005044//scavenger receptor activity;GO:0005515//protein binding	GO:0016021//integral component of membrane;GO:0030141//secretory granule
ENSG00000174529	0.9	1.68	-0.911826	0.0270226	down	388730	Q6P7N7	TMEM81	NP_976310.1	transmembrane protein 81 precursor				-	-	GO:0016021//integral component of membrane
ENSG00000205090	0.26	0.08	1.73211	0.00516898	up	339453	Q5SV17	TMEM240	NP_001108220.1	transmembrane protein 240				-	-	GO:0016021//integral component of membrane;GO:0030054//cell junction;GO:0097060//synaptic membrane
ENSG00000253304	0.27	0.13	1.10135	0.0245523	up	399474	Q69YZ2	TMEM200B	NP_001003682.1	transmembrane protein 200B				-	-	GO:0016021//integral component of membrane
XLOC_054662	3.84	1.73	1.15609	0.00391718	up	51522	A0A024R001	TMEM14C	NP_001158730.1	transmembrane protein 14C
ENSG00000181291	0.01	0.04	-1.78566	0.0156779	down	124842	A0A0J9YW40	TMEM132E	NP_001291367.1	transmembrane protein 132E precursor	K17599	TMEM132	K17599 TMEM132; transmembrane protein 132	-	-	GO:0016021//integral component of membrane
ENSG00000181234	0	0.01	-3.54922	0.0210434	down	92293	Q8N3T6	TMEM132C	XP_011537300.1	transmembrane protein 132C isoform X1	K17599	TMEM132	K17599 TMEM132; transmembrane protein 132	GO:0008150//biological_process	GO:0003674//molecular_function	GO:0005575//cellular_component;GO:0016021//integral component of membrane
ENSG00000183307	0	0.02	-1.99017	0.0411582	down	27439	Q9BXQ6	TMEM121B	XP_011544427.1	transmembrane protein 121B isoform X2
ENSG00000181847	0.01	0	3.53907	0.0217467	up	201633	Q495A1	TIGIT	NP_776160.2	T-cell immunoreceptor with Ig and ITIM domains precursor	K16350	TIGIT	K16350 TIGIT; T-cell immunoreceptor with Ig and ITIM domains	GO:0032695//negative regulation of interleukin-12 production;GO:0032733//positive regulation of interleukin-10 production;GO:0050868//negative regulation of T cell activation	GO:0005102//receptor binding;GO:0005515//protein binding;GO:0042802//identical protein binding	GO:0005886//plasma membrane;GO:0009986//cell surface;GO:0016021//integral component of membrane
ENSG00000169989	0.19	0.43	-1.15372	0.0116376	down	201798	Q8IY51	TIGD4	XP_005262864.1	tigger transposable element-derived protein 4 isoform X1				-	GO:0003677//DNA binding	GO:0005634//nucleus
ENSG00000163634	0.05	0.17	-1.62297	0.045015	down	80145	A0A024R332	THOC7	XP_006713402.1	THO complex subunit 7 homolog isoform X1	K13176	THOC7	K13176 THOC7; THO complex subunit 7	GO:0006405//RNA export from nucleus;GO:0006406//mRNA export from nucleus;GO:0008380//RNA splicing;GO:0031124//mRNA 3'-end processing;GO:0046784//viral mRNA export from host cell nucleus	GO:0003723//RNA binding;GO:0005515//protein binding	GO:0000346//transcription export complex;GO:0000347//THO complex;GO:0000445//THO complex part of transcription export complex;GO:0000784//nuclear chromosome, telomeric region;GO:0005634//nucleus;GO:0005654//nucleoplasm;GO:0005737//cytoplasm;GO:0005829//cytosol;GO:0016607//nuclear speck
ENSG00000153779	0.06	0	3.83564	0.010729	up	90316	Q8IUE1	TGIF2LX	NP_620410.3	homeobox protein TGIF2LX	K19554	TGIF2L	K19554 TGIF2L; homeobox protein TGIF2L	GO:0006357//regulation of transcription from RNA polymerase II promoter	GO:0000981//RNA polymerase II transcription factor activity, sequence-specific DNA binding;GO:0003677//DNA binding	GO:0005634//nucleus
ENSG00000092969	0.02	0.01	2.11724	0.0271548	up	7042	P61812	TGFB2	NP_003229.1	transforming growth factor beta-2 proprotein isoform 2 preproprotein	K13376	TGFB2	K13376 TGFB2; transforming growth factor beta-2	GO:0000902//cell morphogenesis;GO:0001501//skeletal system development;GO:0001525//angiogenesis;GO:0001654//eye development;GO:0001666//response to hypoxia;GO:0001822//kidney development;GO:0001837//epithelial to mesenchymal transition;GO:0001843//neural tube closure;GO:0001942//hair follicle development;GO:0002576//platelet degranulation;GO:0003007//heart morphogenesis;GO:0003148//outflow tract …	GO:0001540//beta-amyloid binding;GO:0005102//receptor binding;GO:0005114//type II transforming growth factor beta receptor binding;GO:0005125//cytokine activity;GO:0005160//transforming growth factor beta receptor binding;GO:0005515//protein binding;GO:0008083//growth factor activity;GO:0034714//type III transforming growth factor beta receptor binding;GO:0042803//protein homodimerization activit…	GO:0005576//extracellular region;GO:0005615//extracellular space;GO:0030424//axon;GO:0031093//platelet alpha granule lumen;GO:0043025//neuronal cell body
ENSG00000091513	0	0	-4.09255	0.00518802	down	7018	H7C5E8	TF	NP_001341633.2	serotransferrin isoform 3	K14736	TF	K14736 TF; transferrin	GO:0001895//retina homeostasis;GO:0002576//platelet degranulation;GO:0006879//cellular iron ion homeostasis;GO:0031647//regulation of protein stability;GO:0033572//transferrin transport;GO:0034755//iron ion transmembrane transport;GO:0034756//regulation of iron ion transport;GO:0043687//post-translational protein modification;GO:0044267//cellular protein metabolic process;GO:0048260//positive reg…	GO:0005515//protein binding;GO:0008198//ferrous iron binding;GO:0008199//ferric iron binding;GO:0015091//ferric iron transmembrane transporter activity;GO:0034986//iron chaperone activity;GO:1990459//transferrin receptor binding	GO:0005576//extracellular region;GO:0005615//extracellular space;GO:0005769//early endosome;GO:0005770//late endosome;GO:0005788//endoplasmic reticulum lumen;GO:0005905//clathrin-coated pit;GO:0009925//basal plasma membrane;GO:0009986//cell surface;GO:0010008//endosome membrane;GO:0016324//apical plasma membrane;GO:0030139//endocytic vesicle;GO:0030665//clathrin-coated vesicle membrane;GO:0031232…
ENSG00000175018	0.09	0.26	-1.54305	0.02334	down	387718	Q5VZQ5	TEX36	NP_001121674.1	testis-expressed protein 36 isoform a
ENSG00000174016	0.17	0.08	1.10699	0.0335374	up	169966	Q8NEK8	TENT5D	NP_001164045.1	terminal nucleotidyltransferase 5D	K23035	TENT5D	K23035 TENT5D; terminal nucleotidyltransferase 5D [EC:2.7.7.19]	-	GO:0005515//protein binding;GO:1990817//RNA adenylyltransferase activity	-
ENSG00000203730	0.04	0	2.59687	0.0197059	up	127670	Q5T9Z0	TEDDM1	NP_741997.3	transmembrane epididymal protein 1				-	-	GO:0016021//integral component of membrane
ENSG00000242220	0.07	0.03	1.36825	0.032455	up	140290	J3KTL9	TCP10L	NP_653260.1	T-complex protein 10A homolog 1				GO:0000122//negative regulation of transcription from RNA polymerase II promoter	GO:0003714//transcription corepressor activity;GO:0005515//protein binding;GO:0042802//identical protein binding;GO:0043621//protein self-association;GO:0070491//repressing transcription factor binding	GO:0005634//nucleus;GO:0005814//centriole
XLOC_055209	0.63	0.31	1.03808	0.0120313	up	6941	H0YFN0	TCF19	NP_001305837.1	transcription factor 19				GO:0006355//regulation of transcription, DNA-templated
ENSG00000184905	0.01	0.08	-2.27204	0.0158892	down	140597	Q9H3H9	TCEAL2	NP_525129.1	transcription elongation factor A protein-like 2				-	GO:0050699//WW domain binding	GO:0005634//nucleus
XLOC_054992	0.58	0.11	2.42156	1.91413e-07	up	6905	A0A2R8Y551	TBCE	NP_001274731.1	tubulin-specific chaperone E isoform c	K21768	TBCE	K21768 TBCE; tubulin-specific chaperone E
ENSG00000273513	0.06	0.13	-1.24427	0.0476223	down	102723859	A0A087X1G2	TBC1D3E	NP_001278395.1	TBC1 domain family member 3E	K20134	TBC1D3	K20134 TBC1D3; TBC1 domain family member 3	GO:0006886//intracellular protein transport;GO:0090630//activation of GTPase activity	GO:0005096//GTPase activator activity;GO:0017137//Rab GTPase binding	GO:0005886//plasma membrane
ENSG00000274611	0.08	0.03	1.50476	0.0478014	up	729873	Q8IZP1	TBC1D3	NP_001116863.3	TBC1 domain family member 3	K20134	TBC1D3	K20134 TBC1D3; TBC1 domain family member 3	GO:0006886//intracellular protein transport;GO:0090630//activation of GTPase activity;GO:1902017//regulation of cilium assembly	GO:0005096//GTPase activator activity;GO:0017137//Rab GTPase binding	GO:0005886//plasma membrane;GO:0031901//early endosome membrane
ENSG00000198673	0.16	0.3	-0.925295	0.0360609	down	338811	F8VVF9	TAFA2	XP_024304732.1	chemokine-like protein TAFA-2 isoform X3				GO:0007613//memory;GO:0008542//visual learning	GO:0048018//receptor agonist activity	GO:0005615//extracellular space;GO:0005634//nucleus;GO:0005737//cytoplasm
XLOC_054909	1.03	0.34	1.59268	0.000102186	up	6871	A0A087WYK3	TADA2A	XP_016880475.1	transcriptional adapter 2-alpha isoform X5	K11314	TADA2A	K11314 TADA2A; transcriptional adapter 2-alpha
ENSG00000143858	0.03	0.07	-1.12153	0.0295598	down	127833	A0A024R9B3	SYT2	NP_001129976.1	synaptotagmin-2	K19902	SYT2	K19902 SYT2; synaptotagmin-2	GO:0014059//regulation of dopamine secretion;GO:0016079//synaptic vesicle exocytosis;GO:0016192//vesicle-mediated transport;GO:0017156//calcium ion regulated exocytosis;GO:0017158//regulation of calcium ion-dependent exocytosis;GO:0048488//synaptic vesicle endocytosis;GO:0048791//calcium ion-regulated exocytosis of neurotransmitter;GO:0061024//membrane organization;GO:0071277//cellular response t…	GO:0000149//SNARE binding;GO:0001786//phosphatidylserine binding;GO:0005509//calcium ion binding;GO:0005515//protein binding;GO:0005544//calcium-dependent phospholipid binding;GO:0019905//syntaxin binding;GO:0030276//clathrin binding;GO:0043533//inositol 1,3,4,5 tetrakisphosphate binding	GO:0005886//plasma membrane;GO:0016021//integral component of membrane;GO:0030054//cell junction;GO:0030424//axon;GO:0030665//clathrin-coated vesicle membrane;GO:0030672//synaptic vesicle membrane;GO:0031045//dense core granule;GO:0042584//chromaffin granule membrane;GO:0070382//exocytic vesicle
ENSG00000132718	0.04	0.01	1.43541	0.0466815	up	23208	Q9BT88	SYT11	XP_005245071.1	synaptotagmin-11 isoform X2	K19911	SYT11	K19911 SYT11; synaptotagmin-11	GO:0001778//plasma membrane repair;GO:0014059//regulation of dopamine secretion;GO:0016192//vesicle-mediated transport;GO:0017156//calcium ion regulated exocytosis;GO:0017158//regulation of calcium ion-dependent exocytosis;GO:0046929//negative regulation of neurotransmitter secretion;GO:0048791//calcium ion-regulated exocytosis of neurotransmitter;GO:0050765//negative regulation of phagocytosis;G…	GO:0000149//SNARE binding;GO:0001786//phosphatidylserine binding;GO:0005509//calcium ion binding;GO:0005515//protein binding;GO:0005544//calcium-dependent phospholipid binding;GO:0030276//clathrin binding;GO:0031369//translation initiation factor binding;GO:0031625//ubiquitin protein ligase binding;GO:0042803//protein homodimerization activity;GO:0048487//beta-tubulin binding	GO:0001891//phagocytic cup;GO:0005764//lysosome;GO:0005886//plasma membrane;GO:0008021//synaptic vesicle;GO:0014069//postsynaptic density;GO:0030054//cell junction;GO:0030285//integral component of synaptic vesicle membrane;GO:0030424//axon;GO:0032009//early phagosome;GO:0043005//neuron projection;GO:0043195//terminal bouton;GO:0043197//dendritic spine;GO:0044297//cell body;GO:0045335//phagocytic…
ENSG00000101463	0.05	0.01	2.11727	0.0271528	up	79953	Q9H7V2	SYNDIG1	XP_016883554.1	synapse differentiation-inducing gene protein 1 isoform X2				GO:0006886//intracellular protein transport;GO:0051965//positive regulation of synapse assembly;GO:0097091//synaptic vesicle clustering	GO:0005515//protein binding;GO:0035254//glutamate receptor binding;GO:0042803//protein homodimerization activity	GO:0005887//integral component of plasma membrane;GO:0014069//postsynaptic density;GO:0030054//cell junction;GO:0031901//early endosome membrane;GO:0043197//dendritic spine;GO:0043198//dendritic shaft;GO:0043231//intracellular membrane-bounded organelle;GO:0044297//cell body;GO:0045211//postsynaptic membrane;GO:0060076//excitatory synapse;GO:0098793//presynapse
ENSG00000217442	0.35	0.93	-1.39023	0.0138354	down	644186	A1L190	SYCE3	XP_024308029.1	synaptonemal complex central element protein 3 isoform X1	K19536	SYCE3	K19536 SYCE3; synaptonemal complex central element protein 3	GO:0007130//synaptonemal complex assembly;GO:0007131//reciprocal meiotic recombination;GO:0007283//spermatogenesis;GO:0043065//positive regulation of apoptotic process;GO:0051301//cell division	GO:0005515//protein binding	GO:0000801//central element;GO:0005634//nucleus;GO:0005694//chromosome
ENSG00000198203	0.01	0.04	-1.47743	0.0310516	down	6819	H7BZ17	SULT1C2	XP_005264070.1	sulfotransferase 1C2 isoform X1	K01025	SULT1	K01025 SULT1; sulfotransferase [EC:2.8.2.-]	GO:0009308//amine metabolic process;GO:0050427//3'-phosphoadenosine 5'-phosphosulfate metabolic process;GO:0051923//sulfation	GO:0005515//protein binding;GO:0008146//sulfotransferase activity	GO:0005737//cytoplasm;GO:0005829//cytosol
ENSG00000243244	0.01	0	3.83648	0.0107128	up	11037	Q9Y6Q2	STON1	NP_001185524.1	stonin-1	K20067	STON1_2	K20067 STON1_2; stonin-1/2	GO:0006897//endocytosis;GO:0030100//regulation of endocytosis	-	GO:0005737//cytoplasm;GO:0016020//membrane
ENSG00000230873	0.07	0.17	-1.19578	0.040985	down	401236	H3BQB6	STMND1	NP_001177695.1	stathmin domain-containing protein 1				GO:0007019//microtubule depolymerization;GO:0031110//regulation of microtubule polymerization or depolymerization;GO:0031175//neuron projection development;GO:0051493//regulation of cytoskeleton organization	GO:0015631//tubulin binding	GO:0005737//cytoplasm;GO:0043005//neuron projection
ENSG00000204344	0.11	0.04	1.51861	0.0337928	up	8859	H0YAS4	STK19	NP_004188.1	serine/threonine-protein kinase 19 isoform 1	K08880	STK19	K08880 STK19; serine/threonine kinase 19 [EC:2.7.11.1]
ENSG00000248592	0.03	0.01	2.37277	0.0106962	up	100526772	A8MSY1	STIMATE-MUSTN1	NP_001185903.2	TMEM110-MUSTN1 fusion protein				GO:0032237//activation of store-operated calcium channel activity;GO:0035584//calcium-mediated signaling using intracellular calcium source	GO:0005246//calcium channel regulator activity	GO:0016020//membrane;GO:0032541//cortical endoplasmic reticulum
ENSG00000174448	0.24	0.09	1.44018	0.0194068	up	147323	P59095	STARD6	XP_016881042.1	stAR-related lipid transfer protein 6 isoform X1				GO:0006869//lipid transport	GO:0008289//lipid binding	-
ENSG00000178078	0.87	0.45	0.963274	0.0226764	up	55620	M0R2W4	STAP2	NP_001013863.1	signal-transducing adaptor protein 2 isoform 2				GO:0042531//positive regulation of tyrosine phosphorylation of STAT protein	GO:0005515//protein binding;GO:0035591//signaling adaptor activity	GO:0005829//cytosol;GO:0005886//plasma membrane
ENSG00000066923	0.23	0.41	-0.842001	0.0443681	down	10734	D6W5U7	STAG3	NP_001269646.1	cohesin subunit SA-3 isoform 2	K13055	STAG3	K13055 STAG3; cohesin complex subunit SA-3	GO:0007062//sister chromatid cohesion;GO:0007130//synaptonemal complex assembly	GO:0003682//chromatin binding	GO:0000775//chromosome, centromeric region;GO:0000785//chromatin;GO:0000795//synaptonemal complex;GO:0005615//extracellular space;GO:0005634//nucleus;GO:0008278//cohesin complex;GO:0030893//meiotic cohesin complex
ENSG00000144681	0.03	0.01	2.11743	0.0271413	up	6769	C9J3Z9	STAC	XP_016862572.1	SH3 and cysteine-rich domain-containing protein isoform X4				GO:0003009//skeletal muscle contraction;GO:0007165//signal transduction;GO:0034605//cellular response to heat;GO:0035556//intracellular signal transduction;GO:1901387//positive regulation of voltage-gated calcium channel activity;GO:1903078//positive regulation of protein localization to plasma membrane;GO:2001259//positive regulation of cation channel activity	GO:0005515//protein binding;GO:0044325//ion channel binding;GO:0046872//metal ion binding	GO:0005829//cytosol;GO:0030315//T-tubule;GO:0031234//extrinsic component of cytoplasmic side of plasma membrane
ENSG00000010327	0.02	0	1.70549	0.0331497	up	23166	H7C4W7	STAB1	XP_016861489.1	stabilin-1 isoform X4	K19020	STAB1	K19020 STAB1; stabilin-1	GO:0006898//receptor-mediated endocytosis;GO:0006954//inflammatory response;GO:0007155//cell adhesion;GO:0007267//cell-cell signaling;GO:0016525//negative regulation of angiogenesis;GO:0042742//defense response to bacterium;GO:0055114//oxidation-reduction process	GO:0005041//low-density lipoprotein receptor activity;GO:0005044//scavenger receptor activity;GO:0005509//calcium ion binding;GO:0005515//protein binding;GO:0005540//hyaluronic acid binding;GO:0015035//protein disulfide oxidoreductase activity;GO:0030169//low-density lipoprotein particle binding	GO:0005886//plasma membrane;GO:0005887//integral component of plasma membrane;GO:0030666//endocytic vesicle membrane
ENSG00000126752	0.08	0.02	1.96962	0.0434878	up	6756	Q16384	SSX1	NP_005626.1	protein SSX1	K15624	SSX1	K15624 SSX1; protein SSX1	GO:0006355//regulation of transcription, DNA-templated;GO:1903507//negative regulation of nucleic acid-templated transcription	GO:0003676//nucleic acid binding;GO:0003714//transcription corepressor activity;GO:0005515//protein binding	GO:0005634//nucleus
ENSG00000125046	0.17	0.33	-0.986417	0.0285264	down	51066	Q9Y2M2	SSUH2	XP_016862026.1	protein SSUH2 homolog isoform X16				GO:0042476//odontogenesis	-	GO:0005634//nucleus;GO:0005737//cytoplasm
ENSG00000124193	0.04	0.01	2.2696	0.00599941	up	6431	Q13247	SRSF6	NP_006266.2	serine/arginine-rich splicing factor 6	K12893	SFRS4_5_6	K12893 SFRS4_5_6; splicing factor, arginine/serine-rich 4/5/6	GO:0000380//alternative mRNA splicing, via spliceosome;GO:0000381//regulation of alternative mRNA splicing, via spliceosome;GO:0000398//mRNA splicing, via spliceosome;GO:0006376//mRNA splice site selection;GO:0006405//RNA export from nucleus;GO:0006406//mRNA export from nucleus;GO:0010837//regulation of keratinocyte proliferation;GO:0031124//mRNA 3'-end processing;GO:0032868//response to insulin;…	GO:0003723//RNA binding;GO:0005515//protein binding;GO:0036002//pre-mRNA binding	GO:0005634//nucleus;GO:0005654//nucleoplasm;GO:0016607//nuclear speck
ENSG00000185739	0.02	0.05	-1.32859	0.0388576	down	6345	Q86TD4	SRL	NP_001310597.1	sarcalumenin isoform 2				-	GO:0005525//GTP binding	GO:0033018//sarcoplasmic reticulum lumen
ENSG00000182557	0.2	0.08	1.16148	0.0430585	up	201305	I3L3W7	SPNS3	XP_016879834.1	protein spinster homolog 3 isoform X6	K23677	SPNS	K23677 SPNS; MFS transporter, Spinster family, sphingosine-1-phosphate transporter	GO:0006869//lipid transport;GO:0055085//transmembrane transport	-	GO:0016021//integral component of membrane
ENSG00000164266	0.21	0.44	-1.03151	0.0466464	down	6690	D6RIU5	SPINK1	NP_001341895.1	serine protease inhibitor Kazal-type 1 precursor	K23417	SPINK1	K23417 SPINK1; serine protease inhibitor Kazal-type 1	GO:0010751//negative regulation of nitric oxide mediated signal transduction;GO:0048240//sperm capacitation;GO:0050732//negative regulation of peptidyl-tyrosine phosphorylation;GO:0060046//regulation of acrosome reaction;GO:0090281//negative regulation of calcium ion import;GO:1900004//negative regulation of serine-type endopeptidase activity;GO:2001256//regulation of store-operated calcium entry	GO:0004866//endopeptidase inhibitor activity;GO:0004867//serine-type endopeptidase inhibitor activity;GO:0005515//protein binding	GO:0070062//extracellular exosome
ENSG00000066336	0.02	0.11	-1.99591	0.019302	down	6688	F5H3K6	SPI1	XP_016873662.1	transcription factor PU.1 isoform X1	K09438	SPI1	K09438 SPI1; transcription factor PU.1	GO:0000122//negative regulation of transcription from RNA polymerase II promoter;GO:0002320//lymphoid progenitor cell differentiation;GO:0006357//regulation of transcription from RNA polymerase II promoter;GO:0030098//lymphocyte differentiation;GO:0030154//cell differentiation;GO:0030218//erythrocyte differentiation;GO:0030225//macrophage differentiation;GO:0030851//granulocyte differentiation;GO…	GO:0000978//RNA polymerase II core promoter proximal region sequence-specific DNA binding;GO:0000980//RNA polymerase II distal enhancer sequence-specific DNA binding;GO:0000981//RNA polymerase II transcription factor activity, sequence-specific DNA binding;GO:0001085//RNA polymerase II transcription factor binding;GO:0001227//transcriptional repressor activity, RNA polymerase II transcription reg…	GO:0000790//nuclear chromatin;GO:0005634//nucleus;GO:0005654//nucleoplasm;GO:0005667//transcription factor complex
ENSG00000152583	0.04	0.1	-1.22197	0.0458176	down	8404	A0A024RDE1	SPARCL1	NP_004675.3	SPARC-like protein 1 isoform 1 precursor				GO:0007165//signal transduction;GO:0043687//post-translational protein modification;GO:0044267//cellular protein metabolic process;GO:0099560//synaptic membrane adhesion	GO:0005509//calcium ion binding;GO:0005515//protein binding;GO:0005518//collagen binding;GO:0050840//extracellular matrix binding	GO:0005576//extracellular region;GO:0005615//extracellular space;GO:0005788//endoplasmic reticulum lumen;GO:0098978//glutamatergic synapse
ENSG00000106304	0.03	0	4.08267	0.00542631	up	6677	Q5D1J4	SPAM1	NP_001167517.1	hyaluronidase PH-20 isoform 2	K01197	hya	K01197 hya; hyaluronoglucosaminidase [EC:3.2.1.35]	GO:0005975//carbohydrate metabolic process;GO:0007155//cell adhesion;GO:0007339//binding of sperm to zona pellucida;GO:0007342//fusion of sperm to egg plasma membrane;GO:0035036//sperm-egg recognition	GO:0004415//hyalurononglucosaminidase activity	GO:0005886//plasma membrane;GO:0031225//anchored component of membrane
ENSG00000137098	0.05	0	2.9055	0.00673913	up	26206	F2Z302	SPAG8	XP_024303283.1	sperm-associated antigen 8 isoform X6				GO:0007049//cell cycle;GO:0007283//spermatogenesis;GO:0007338//single fertilization;GO:0008150//biological_process;GO:0030154//cell differentiation;GO:0045944//positive regulation of transcription from RNA polymerase II promoter	GO:0003674//molecular_function;GO:0005515//protein binding;GO:0008017//microtubule binding	GO:0001669//acrosomal vesicle;GO:0005634//nucleus;GO:0005737//cytoplasm;GO:0005819//spindle;GO:0016020//membrane
ENSG00000171056	0.01	0.06	-2.00204	0.00989713	down	83595	Q9BT81	SOX7	NP_113627.1	transcription factor SOX-7	K09270	SOX7S	K09270 SOX7S; transcription factor SOX7/8/10/18 (SOX group E/F)
ENSG00000064692	0.03	0.09	-1.6011	0.00472759	down	9627	Q6L983	SNCAIP	XP_016865574.1	synphilin-1 isoform X11	K04558	SNCAIP	K04558 SNCAIP; synuclein, alpha interacting protein (synphilin)	GO:0008219//cell death;GO:0042417//dopamine metabolic process;GO:0044267//cellular protein metabolic process;GO:0046928//regulation of neurotransmitter secretion;GO:0090083//regulation of inclusion body assembly	GO:0005515//protein binding;GO:0031625//ubiquitin protein ligase binding;GO:0042802//identical protein binding	GO:0005654//nucleoplasm;GO:0005737//cytoplasm;GO:0005829//cytosol;GO:0008021//synaptic vesicle;GO:0036464//cytoplasmic ribonucleoprotein granule;GO:0042734//presynaptic membrane;GO:0043025//neuronal cell body
ENSG00000172062	0.14	0.03	2.06138	0.00742791	up	6606	E7EQZ4	SMN1	XP_011541898.1	survival motor neuron protein isoform X1	K13129	SMN	K13129 SMN; survival motor neuron protein
ENSG00000273590	0.11	0.24	-1.07174	0.0481225	down	102723553	Q8TCY0	SMIM11B	XP_016883693.1	uncharacterized protein LOC102723553 isoform X1				-	-	GO:0016021//integral component of membrane
ENSG00000165935	0.07	0.18	-1.47783	0.0310052	down	341346	A6NFE2	SMCO2	XP_016874743.1	single-pass membrane and coiled-coil domain-containing protein 2 isoform X2				-	-	GO:0016021//integral component of membrane
ENSG00000170290	0	0.08	-4.09273	0.00518605	down	6588	A0A158RFT9	SLN	NP_003054.1	sarcolipin	K22642	SLN	K22642 SLN; sarcolipin	GO:0006816//calcium ion transport;GO:0043086//negative regulation of catalytic activity;GO:0043242//negative regulation of protein complex disassembly;GO:0051924//regulation of calcium ion transport;GO:0070296//sarcoplasmic reticulum calcium ion transport;GO:0090281//negative regulation of calcium ion import;GO:1901020//negative regulation of calcium ion transmembrane transporter activity;GO:1901…	GO:0004857//enzyme inhibitor activity;GO:0005515//protein binding;GO:0051117//ATPase binding	GO:0016021//integral component of membrane;GO:0016529//sarcoplasmic reticulum;GO:0033017//sarcoplasmic reticulum membrane
ENSG00000236320	0.03	0.07	-1.40349	0.0420139	down	342618	P0C7P3	SLFN14	XP_016880066.1	protein SLFN14 isoform X1				GO:0006402//mRNA catabolic process;GO:0016075//rRNA catabolic process;GO:0036345//platelet maturation;GO:0071286//cellular response to magnesium ion;GO:0071287//cellular response to manganese ion;GO:0090502//RNA phosphodiester bond hydrolysis, endonucleolytic	GO:0004521//endoribonuclease activity;GO:0005524//ATP binding;GO:0043022//ribosome binding	GO:0005634//nucleus;GO:0005737//cytoplasm
ENSG00000021488	0.08	0.02	1.97596	0.0206455	up	11136	P82251	SLC7A9	NP_055085.1	B(0,+)-type amino acid transporter 1	K13868	SLC7A9	K13868 SLC7A9; solute carrier family 7 (L-type amino acid transporter), member 9	GO:0003333//amino acid transmembrane transport;GO:0006865//amino acid transport;GO:0015804//neutral amino acid transport;GO:0015811//L-cystine transport;GO:0050900//leukocyte migration;GO:0065003//macromolecular complex assembly;GO:1902475//L-alpha-amino acid transmembrane transport	GO:0005515//protein binding;GO:0015175//neutral amino acid transmembrane transporter activity;GO:0015179//L-amino acid transmembrane transporter activity;GO:0015184//L-cystine transmembrane transporter activity;GO:0042605//peptide antigen binding	GO:0005886//plasma membrane;GO:0005887//integral component of plasma membrane;GO:0016324//apical plasma membrane;GO:0031526//brush border membrane
ENSG00000151012	0.45	0.83	-0.884385	0.0219429	down	23657	H0Y9F9	SLC7A11	XP_011530104.1	cystine/glutamate transporter isoform X1	K13869	SLC7A11	K13869 SLC7A11; solute carrier family 7 (L-type amino acid transporter), member 11	GO:0003333//amino acid transmembrane transport;GO:0006749//glutathione metabolic process;GO:0006865//amino acid transport;GO:0008542//visual learning;GO:0009636//response to toxic substance;GO:0014070//response to organic cyclic compound;GO:0021591//ventricular system development;GO:0021756//striatum development;GO:0030534//adult behavior;GO:0033029//regulation of neutrophil apoptotic process;GO:…	GO:0005515//protein binding;GO:0015179//L-amino acid transmembrane transporter activity;GO:0015327//cystine:glutamate antiporter activity	GO:0005791//rough endoplasmic reticulum;GO:0005856//cytoskeleton;GO:0005886//plasma membrane;GO:0009986//cell surface;GO:0016021//integral component of membrane;GO:0031526//brush border membrane;GO:0097449//astrocyte projection
ENSG00000140675	0.07	0.02	1.89367	0.0157186	up	6524	P31639	SLC5A2	NP_003032.1	sodium/glucose cotransporter 2	K14382	SLC5A2	K14382 SLC5A2; solute carrier family 5 (sodium/glucose cotransporter), member 2	GO:0005975//carbohydrate metabolic process;GO:0006814//sodium ion transport;GO:0008645//hexose transport;GO:1904659//glucose transmembrane transport	GO:0005362//low-affinity glucose:sodium symporter activity;GO:0005412//glucose:sodium symporter activity	GO:0005886//plasma membrane;GO:0016021//integral component of membrane;GO:0070062//extracellular exosome
ENSG00000113073	0.14	0.06	1.2165	0.0275203	up	83697	Q96Q91	SLC4A9	NP_113655.2	anion exchange protein 4 isoform 2	K13860	SLC4A9	K13860 SLC4A9; solute carrier family 4 (sodium bicarbonate cotransporter), member 9	GO:0015698//inorganic anion transport;GO:0015701//bicarbonate transport;GO:0051453//regulation of intracellular pH;GO:0098656//anion transmembrane transport	GO:0005452//inorganic anion exchanger activity;GO:0008510//sodium:bicarbonate symporter activity;GO:0015301//anion:anion antiporter activity	GO:0005886//plasma membrane;GO:0005887//integral component of plasma membrane
ENSG00000167703	0.01	0.05	-2.00487	0.00138784	down	124935	I3L4V3	SLC43A2	XP_016879668.1	large neutral amino acids transporter small subunit 4 isoform X2	K08229	SLC43A2	K08229 SLC43A2; MFS transporter, LAT3 family, solute carrier family 43, member 2
ENSG00000147804	0.03	0	2.4144	0.0340303	up	55630	E9PQ16	SLC39A4	XP_024302956.1	zinc transporter ZIP4 isoform X1	K14710	SLC39A4	K14710 SLC39A4; solute carrier family 39 (zinc transporter), member 4	GO:0006882//cellular zinc ion homeostasis;GO:0007165//signal transduction;GO:0034224//cellular response to zinc ion starvation;GO:0071578//zinc II ion transmembrane import	GO:0005385//zinc ion transmembrane transporter activity	GO:0005886//plasma membrane;GO:0005887//integral component of plasma membrane;GO:0016324//apical plasma membrane;GO:0031410//cytoplasmic vesicle;GO:0055038//recycling endosome membrane
ENSG00000143554	0.09	0.02	2.2131	0.000541598	up	11000	H0YDP0	SLC27A3	NP_077306.3	solute carrier family 27 member 3 isoform 1 precursor	K08772	SLC27A3	K08772 SLC27A3; solute carrier family 27 (fatty acid transporter), member 3 [EC:6.2.1.-]
ENSG00000105143	0.02	0	4.29212	0.00281717	up	6511	M0R1V3	SLC1A6	NP_001259016.1	excitatory amino acid transporter 4 isoform 1	K05617	SLC1A6	K05617 SLC1A6; solute carrier family 1 (high affinity glutamate/aspartate transporter), member 6	GO:0001504//neurotransmitter uptake;GO:0006811//ion transport;GO:0007268//chemical synaptic transmission;GO:0014047//glutamate secretion;GO:0015810//aspartate transport;GO:0015813//L-glutamate transport;GO:0042391//regulation of membrane potential;GO:0070778//L-aspartate transport;GO:0098712//L-glutamate import across plasma membrane	GO:0005314//high-affinity glutamate transmembrane transporter activity;GO:0015183//L-aspartate transmembrane transporter activity;GO:0046872//metal ion binding	GO:0005794//Golgi apparatus;GO:0005886//plasma membrane;GO:0005887//integral component of plasma membrane;GO:0016020//membrane;GO:0045111//intermediate filament cytoskeleton;GO:0098978//glutamatergic synapse;GO:0099056//integral component of presynaptic membrane
ENSG00000188991	0.02	0	4.08288	0.00542396	up	729025	A6NIM6	SLC15A5	NP_001164269.1	solute carrier family 15 member 5	K14639	SLC15A5	K14639 SLC15A5; solute carrier family 15, member 5	GO:0015031//protein transport;GO:0035672//oligopeptide transmembrane transport;GO:1902600//hydrogen ion transmembrane transport	GO:0005515//protein binding;GO:0015333//peptide:proton symporter activity;GO:0035673//oligopeptide transmembrane transporter activity;GO:1904680//peptide transmembrane transporter activity	GO:0016021//integral component of membrane
ENSG00000158296	0.1	0.23	-1.15202	0.0136427	down	64849	Q8WWT9	SLC13A3	NP_073740.2	solute carrier family 13 member 3 isoform a precursor	K14445	SLC13A2_3_5	K14445 SLC13A2_3_5; solute carrier family 13 (sodium-dependent dicarboxylate transporter), member 2/3/5	GO:0006814//sodium ion transport;GO:0015746//citrate transport;GO:0071422//succinate transmembrane transport	GO:0015137//citrate transmembrane transporter activity;GO:0015141//succinate transmembrane transporter activity;GO:0015362//high-affinity sodium:dicarboxylate symporter activity;GO:0017153//sodium:dicarboxylate symporter activity	GO:0005886//plasma membrane;GO:0016021//integral component of membrane;GO:0070062//extracellular exosome
ENSG00000070915	47.07	22.84	1.04304	0.00564192	up	6559	J3QSS1	SLC12A3	NP_001119580.2	solute carrier family 12 member 3 isoform 3	K14426	SLC12A3	K14426 SLC12A3; solute carrier family 12 (sodium/chloride transporter), member 3	GO:0006811//ion transport;GO:0006814//sodium ion transport;GO:0006884//cell volume homeostasis;GO:0035725//sodium ion transmembrane transport;GO:0055064//chloride ion homeostasis;GO:0055075//potassium ion homeostasis;GO:0055078//sodium ion homeostasis;GO:1902476//chloride transmembrane transport;GO:1990573//potassium ion import across plasma membrane	GO:0005515//protein binding;GO:0008511//sodium:potassium:chloride symporter activity;GO:0015081//sodium ion transmembrane transporter activity;GO:0015378//sodium:chloride symporter activity;GO:0015379//potassium:chloride symporter activity	GO:0005829//cytosol;GO:0005886//plasma membrane;GO:0005887//integral component of plasma membrane;GO:0016020//membrane;GO:0016324//apical plasma membrane;GO:0070062//extracellular exosome
ENSG00000253598	0.07	0.19	-1.25987	0.0202464	down	347051	Q5PT55	SLC10A5	NP_001010893.1	sodium/bile acid cotransporter 5 precursor	K14343	SLC10A3_5	K14343 SLC10A3_5; solute carrier family 10 (sodium/bile acid cotransporter), member 3/5	GO:0006814//sodium ion transport;GO:0055085//transmembrane transport	GO:0015293//symporter activity	GO:0016021//integral component of membrane
ENSG00000162739	0	0.02	-3.54922	0.0210434	down	114836	Q96DU3	SLAMF6	XP_016855704.1	SLAM family member 6 isoform X1	K16852	SLAMF6	K16852 SLAMF6; SLAM family member 6	GO:0032729//positive regulation of interferon-gamma production;GO:0032740//positive regulation of interleukin-17 production;GO:0045087//innate immune response;GO:0045954//positive regulation of natural killer cell mediated cytotoxicity;GO:0050776//regulation of immune response;GO:0072540//T-helper 17 cell lineage commitment	GO:0005515//protein binding	GO:0005886//plasma membrane;GO:0016021//integral component of membrane;GO:0070062//extracellular exosome
ENSG00000180730	0.01	0	3.53914	0.0217445	up	387914	Q6UWI4	SHISA2	NP_001007539.1	protein shisa-2 homolog precursor				GO:0007275//multicellular organism development;GO:0030178//negative regulation of Wnt signaling pathway;GO:0040037//negative regulation of fibroblast growth factor receptor signaling pathway	-	GO:0005783//endoplasmic reticulum;GO:0005789//endoplasmic reticulum membrane;GO:0016021//integral component of membrane
ENSG00000157060	0.03	0.09	-1.47508	0.0313208	down	81626	Q9BZQ2	SHCBP1L	NP_112195.2	testicular spindle-associated protein SHCBP1L isoform 1				GO:0007112//male meiosis cytokinesis;GO:0007283//spermatogenesis;GO:0030154//cell differentiation;GO:2001252//positive regulation of chromosome organization	-	GO:0005737//cytoplasm;GO:0072687//meiotic spindle
ENSG00000214193	0.09	0.03	1.58823	0.0144523	up	79729	D6RD64	SH3D21	XP_016857835.1	SH3 domain-containing protein 21 isoform X8				-	-	GO:0005634//nucleus;GO:0005654//nucleoplasm;GO:0005886//plasma membrane
ENSG00000100092	0.08	0.01	2.20951	0.0035616	up	23616	A0A3B3IU28	SH3BP1	NP_001336984.1	SH3 domain-binding protein 1 isoform 2	K20652	SH3BP1	K20652 SH3BP1; SH3-domain binding protein 1	GO:0006911//phagocytosis, engulfment;GO:0007015//actin filament organization;GO:0016477//cell migration;GO:0030834//regulation of actin filament depolymerization;GO:0032956//regulation of actin cytoskeleton organization;GO:0034329//cell junction assembly;GO:0043535//regulation of blood vessel endothelial cell migration;GO:0043547//positive regulation of GTPase activity;GO:0045198//establishment o…	GO:0005096//GTPase activator activity;GO:0005515//protein binding;GO:0017124//SH3 domain binding;GO:0030215//semaphorin receptor binding;GO:0048365//Rac GTPase binding	GO:0000145//exocyst;GO:0001891//phagocytic cup;GO:0005634//nucleus;GO:0005829//cytosol;GO:0005912//adherens junction;GO:0005923//bicellular tight junction;GO:0030027//lamellipodium;GO:0031252//cell leading edge
ENSG00000189410	0.01	0.04	-1.72597	0.0309863	down	400745	E5RGJ3	SH2D5	XP_011539764.1	SH2 domain-containing protein 5 isoform X2				-	-	GO:0014069//postsynaptic density;GO:0030054//cell junction;GO:0045211//postsynaptic membrane
ENSG00000178217	0.01	0.04	-1.88468	0.0292181	down	387694	Q5SQS7	SH2D4B	XP_016871725.1	SH2 domain-containing protein 4B isoform X1				-	-	GO:0005737//cytoplasm
ENSG00000106483	0.15	0.03	1.94525	0.00139885	up	6424	C9JMJ2	SFRP4	NP_003005.2	secreted frizzled-related protein 4 precursor	K02185	SFRP4	K02185 SFRP4; secreted frizzled-related protein 4	GO:0002092//positive regulation of receptor internalization;GO:0008285//negative regulation of cell proliferation;GO:0009725//response to hormone;GO:0010628//positive regulation of gene expression;GO:0030154//cell differentiation;GO:0030178//negative regulation of Wnt signaling pathway;GO:0030510//regulation of BMP signaling pathway;GO:0035567//non-canonical Wnt signaling pathway;GO:0043065//posi…	GO:0005515//protein binding;GO:0017147//Wnt-protein binding	GO:0005615//extracellular space;GO:0005634//nucleus;GO:0005737//cytoplasm;GO:0009986//cell surface
ENSG00000106366	0.12	0.05	1.30745	0.0238901	up	5054	A0A024QYT5	SERPINE1	NP_000593.1	plasminogen activator inhibitor 1 precursor	K03982	SERPINE1	K03982 SERPINE1; plasminogen activator inhibitor 1	GO:0001300//chronological cell aging;GO:0001525//angiogenesis;GO:0002576//platelet degranulation;GO:0007623//circadian rhythm;GO:0010469//regulation of receptor activity;GO:0010757//negative regulation of plasminogen activation;GO:0010951//negative regulation of endopeptidase activity;GO:0014912//negative regulation of smooth muscle cell migration;GO:0030194//positive regulation of blood coagulat…	GO:0002020//protease binding;GO:0004867//serine-type endopeptidase inhibitor activity;GO:0005102//receptor binding;GO:0005515//protein binding	GO:0005576//extracellular region;GO:0005615//extracellular space;GO:0005886//plasma membrane;GO:0031093//platelet alpha granule lumen;GO:0070062//extracellular exosome
ENSG00000197249	0.06	0.02	1.51699	0.0339837	up	5265	E9KL23	SERPINA1	NP_001121177.1	alpha-1-antitrypsin precursor	K03984	SERPINA1	K03984 SERPINA1; alpha-1-antitrypsin	GO:0002576//platelet degranulation;GO:0006888//ER to Golgi vesicle-mediated transport;GO:0006953//acute-phase response;GO:0007596//blood coagulation;GO:0010951//negative regulation of endopeptidase activity;GO:0043312//neutrophil degranulation;GO:0043687//post-translational protein modification;GO:0044267//cellular protein metabolic process;GO:0048208//COPII vesicle coating	GO:0002020//protease binding;GO:0004867//serine-type endopeptidase inhibitor activity;GO:0005515//protein binding;GO:0042802//identical protein binding	GO:0000139//Golgi membrane;GO:0005576//extracellular region;GO:0005615//extracellular space;GO:0005783//endoplasmic reticulum;GO:0005788//endoplasmic reticulum lumen;GO:0005794//Golgi apparatus;GO:0030134//ER to Golgi transport vesicle;GO:0031093//platelet alpha granule lumen;GO:0033116//endoplasmic reticulum-Golgi intermediate compartment membrane;GO:0043231//intracellular membrane-bounded organ…
ENSG00000205572	0.37	0.03	3.77462	1.29811e-08	up	728492	D6RCL9	SERF1B	NP_001171558.1	small EDRK-rich factor 1 isoform 1
ENSG00000082684	2.89	1.34	1.11318	0.00370692	up	54437	C9JKR3	SEMA5B	XP_016862128.1	semaphorin-5B isoform X2	K06841	SEMA5	K06841 SEMA5; semaphorin 5	GO:0001755//neural crest cell migration;GO:0030335//positive regulation of cell migration;GO:0048675//axon extension;GO:0048843//negative regulation of axon extension involved in axon guidance;GO:0050908//detection of light stimulus involved in visual perception;GO:0050919//negative chemotaxis;GO:0071526//semaphorin-plexin signaling pathway;GO:0097485//neuron projection guidance	GO:0030215//semaphorin receptor binding;GO:0045499//chemorepellent activity	GO:0016021//integral component of membrane
ENSG00000101251	0.04	0	2.59792	0.019656	up	80343	C9JNX3	SEL1L2	XP_006723719.1	protein sel-1 homolog 2 isoform X16	K14026	SEL1	K14026 SEL1; SEL1 protein	GO:0030433//ER-associated ubiquitin-dependent protein catabolic process	GO:0004842//ubiquitin-protein transferase activity	GO:0000839//Hrd1p ubiquitin ligase ERAD-L complex;GO:0016021//integral component of membrane
ENSG00000103184	0.06	0.02	1.6291	0.00720708	up	9717	K7ERV2	SEC14L5	NP_055507.1	SEC14-like protein 5
ENSG00000175356	0	0.02	-4.48659	0.00140307	down	57758	H0YDN3	SCUBE2	XP_011518550.1	signal peptide, CUB and EGF-like domain-containing protein 2 isoform X11				GO:0007275//multicellular organism development	GO:0005509//calcium ion binding;GO:0008289//lipid binding	GO:0005576//extracellular region;GO:0005615//extracellular space;GO:0009986//cell surface
ENSG00000155875	0.02	0.04	-1.17182	0.0377333	down	158297	F6S232	SAXO1	NP_001273979.1	stabilizer of axonemal microtubules 1 isoform c				GO:0009631//cold acclimation;GO:0030030//cell projection organization;GO:0034453//microtubule anchoring;GO:0045724//positive regulation of cilium assembly;GO:0050821//protein stabilization;GO:0070417//cellular response to cold	GO:0005515//protein binding;GO:0008017//microtubule binding	GO:0005814//centriole;GO:0005856//cytoskeleton;GO:0005879//axonemal microtubule;GO:0031514//motile cilium;GO:0036064//ciliary basal body;GO:0036126//sperm flagellum
ENSG00000163220	0.2	0.04	2.11784	0.0271113	up	6280	P06702	S100A9	NP_002956.1	protein S100-A9	K21128	S100A9	K21128 S100A9; protein S100-A9	GO:0001816//cytokine production;GO:0002224//toll-like receptor signaling pathway;GO:0002523//leukocyte migration involved in inflammatory response;GO:0006914//autophagy;GO:0006915//apoptotic process;GO:0006919//activation of cysteine-type endopeptidase activity involved in apoptotic process;GO:0006954//inflammatory response;GO:0007267//cell-cell signaling;GO:0010976//positive regulation of neuron…	GO:0005509//calcium ion binding;GO:0005515//protein binding;GO:0008017//microtubule binding;GO:0008270//zinc ion binding;GO:0016209//antioxidant activity;GO:0035662//Toll-like receptor 4 binding;GO:0050544//arachidonic acid binding;GO:0050786//RAGE receptor binding	GO:0005576//extracellular region;GO:0005615//extracellular space;GO:0005634//nucleus;GO:0005654//nucleoplasm;GO:0005737//cytoplasm;GO:0005829//cytosol;GO:0005856//cytoskeleton;GO:0005886//plasma membrane;GO:0030054//cell junction;GO:0034774//secretory granule lumen;GO:0070062//extracellular exosome
ENSG00000143556	0.49	0	5.68477	3.34959e-06	up	6278	P31151	S100A7	NP_002954.2	protein S100-A7	K21126	S100A7	K21126 S100A7; protein S100-A7	GO:0000302//response to reactive oxygen species;GO:0001525//angiogenesis;GO:0008544//epidermis development;GO:0010820//positive regulation of T cell chemotaxis;GO:0019730//antimicrobial humoral response;GO:0030216//keratinocyte differentiation;GO:0032496//response to lipopolysaccharide;GO:0043312//neutrophil degranulation;GO:0045087//innate immune response;GO:0050829//defense response to Gram-neg…	GO:0005509//calcium ion binding;GO:0005515//protein binding;GO:0008270//zinc ion binding;GO:0050786//RAGE receptor binding	GO:0005576//extracellular region;GO:0005615//extracellular space;GO:0005634//nucleus;GO:0005737//cytoplasm;GO:0005783//endoplasmic reticulum;GO:0005829//cytosol;GO:0005925//focal adhesion;GO:0035578//azurophil granule lumen
ENSG00000196420	1.82	0.93	0.957811	0.0289594	up	6276	P33763	S100A5	XP_016857521.1	protein S100-A5 isoform X4				-	GO:0005507//copper ion binding;GO:0005509//calcium ion binding;GO:0008270//zinc ion binding;GO:0042803//protein homodimerization activity	GO:0005634//nucleus;GO:0043025//neuronal cell body
ENSG00000204231	0.02	0	3.53885	0.0217538	up	6257	E9PK75	RXRB	XP_016866665.1	retinoic acid receptor RXR-beta isoform X3	K08525	RXRB	K08525 RXRB; retinoid X receptor beta
ENSG00000176783	0.62	2.01	-1.70004	2.59413e-05	down	80230	H0YA47	RUFY1	XP_016865384.1	RUN and FYVE domain-containing protein 1 isoform X6	K12482	RUFY1	K12482 RUFY1; RUN and FYVE domain-containing protein 1
ENSG00000155026	0.02	0.06	-1.53849	0.0314458	down	222967	P0C881	RSPH10B	XP_011513514.1	radial spoke head 10 homolog B2 isoform X8
XLOC_055270	1.32	0.15	3.04015	1.98649e-07	up	6222	J3JS69	RPS18	NP_072045.1	40S ribosomal protein S18	K02964	RP-S18e	K02964 RP-S18e; small subunit ribosomal protein S18e
ENSG00000257529	0.4	0.93	-1.19657	0.0224696	down	100529097	H7BZ11	RPL36A-HNRNPH2	NP_001186902.2	RPL36A-HNRNPH2 protein isoform a	K02929	RP-L44e	K02929 RP-L44e; large subunit ribosomal protein L44e	-	-	GO:0022625//cytosolic large ribosomal subunit
ENSG00000103269	0.51	0.26	0.957053	0.0429849	up	9028	O75783	RHBDL1	XP_016879338.1	rhomboid-related protein 1 isoform X2	K02857	RHBDL1_2_3	K02857 RHBDL1_2_3; rhomboid-related protein 1/2/3 [EC:3.4.21.105]	GO:0006508//proteolysis;GO:0007165//signal transduction	GO:0004252//serine-type endopeptidase activity	GO:0005887//integral component of plasma membrane;GO:0016020//membrane
ENSG00000187627	0.01	0	3.83634	0.0107155	up	400966	P0DJD0	RGPD1	XP_016859594.1	RANBP2-like and GRIP domain-containing protein 1 isoform X4				GO:0006607//NLS-bearing protein import into nucleus;GO:0043547//positive regulation of GTPase activity	GO:0005096//GTPase activator activity;GO:0008536//Ran GTPase binding	GO:0005634//nucleus;GO:0005643//nuclear pore;GO:0005737//cytoplasm
ENSG00000122035	90.9	47.87	0.925266	0.0139321	up	387496	Q6T310	RASL11A	XP_024305115.1	ras-like protein family member 11A isoform X1	K07852	RASL11A	K07852 RASL11A; Ras-like protein family member 11A	GO:0007165//signal transduction;GO:0045943//positive regulation of transcription from RNA polymerase I promoter	GO:0003924//GTPase activity;GO:0005525//GTP binding	GO:0005730//nucleolus;GO:0016020//membrane
ENSG00000105122	0.02	0.09	-1.96078	0.00183596	down	64926	M0QX12	RASAL3	NP_001334957.1	RAS protein activator like-3 isoform 3	K17634	RASAL3	K17634 RASAL3; RAS protein activator-like 3	GO:0000165//MAPK cascade;GO:0043547//positive regulation of GTPase activity;GO:0046580//negative regulation of Ras protein signal transduction;GO:0051142//positive regulation of NK T cell proliferation	GO:0005096//GTPase activator activity	GO:0005737//cytoplasm;GO:0005829//cytosol;GO:0005938//cell cortex;GO:0016020//membrane;GO:0070062//extracellular exosome;GO:0098562//cytoplasmic side of membrane
XLOC_055043	0.28	0.59	-1.07417	0.0104683	down	5884	O75943	RAD17	NP_579918.1	cell cycle checkpoint protein RAD17 isoform 3	K06662	HRAD17	K06662 HRAD17; cell cycle checkpoint protein
ENSG00000129646	0.25	0.53	-1.09365	0.00713121	down	84074	Q9H0J4	QRICH2	XP_016880695.1	glutamine-rich protein 2 isoform X2
ENSG00000188710	0.37	0.72	-0.961804	0.0299613	down	347148	P83859	QRFP	NP_937823.1	orexigenic neuropeptide QRFP preproprotein				GO:0007186//G-protein coupled receptor signaling pathway;GO:0007218//neuropeptide signaling pathway;GO:0007625//grooming behavior;GO:0007626//locomotory behavior;GO:0045777//positive regulation of blood pressure;GO:0060259//regulation of feeding behavior	GO:0005184//neuropeptide hormone activity;GO:0031854//orexigenic neuropeptide QRFP receptor binding	GO:0005575//cellular_component;GO:0005576//extracellular region
ENSG00000147485	0.15	0.27	-0.856037	0.0497553	down	137902	A1KZ92	PXDNL	XP_011515760.1	peroxidasin-like protein isoform X1	K19511	PXDN	K19511 PXDN; peroxidase [EC:1.11.1.7]	GO:0006979//response to oxidative stress;GO:0042744//hydrogen peroxide catabolic process;GO:0055114//oxidation-reduction process;GO:0090305//nucleic acid phosphodiester bond hydrolysis;GO:0098869//cellular oxidant detoxification	GO:0004519//endonuclease activity;GO:0004601//peroxidase activity;GO:0020037//heme binding;GO:0046872//metal ion binding	GO:0005615//extracellular space;GO:0005737//cytoplasm
ENSG00000152894	0.31	0.15	1.01608	0.01575	up	5796	E9PMV4	PTPRK	XP_011534323.1	receptor-type tyrosine-protein phosphatase kappa isoform X10	K06776	PTPRK	K06776 PTPRK; receptor-type tyrosine-protein phosphatase kappa [EC:3.1.3.48]
ENSG00000153707	0.02	0.01	1.6818	0.024137	up	5789	F5GWR7	PTPRD	XP_016870480.1	receptor-type tyrosine-protein phosphatase delta isoform X36	K06777	PTPRD	K06777 PTPRD; receptor-type tyrosine-protein phosphatase delta [EC:3.1.3.48]
ENSG00000050628	0.01	0.04	-2.2496	0.00142343	down	5733	P43115	PTGER3	NP_942008.1	prostaglandin E2 receptor EP3 subtype isoform 5	K04260	PTGER3	K04260 PTGER3; prostaglandin E receptor 3	GO:0006954//inflammatory response;GO:0007186//G-protein coupled receptor signaling pathway;GO:0007189//adenylate cyclase-activating G-protein coupled receptor signaling pathway;GO:0007200//phospholipase C-activating G-protein coupled receptor signaling pathway;GO:0007204//positive regulation of cytosolic calcium ion concentration;GO:0008219//cell death;GO:0014827//intestine smooth muscle contract…	GO:0004957//prostaglandin E receptor activity	GO:0005635//nuclear envelope;GO:0005886//plasma membrane;GO:0005887//integral component of plasma membrane;GO:0016021//integral component of membrane
ENSG00000171862	0.34	0.13	1.35552	0.0010289	up	5728	A0A087X033	PTEN	NP_001291647.1	phosphatidylinositol 3,4,5-trisphosphate 3-phosphatase and dual-specificity protein phosphatase PTEN isoform 3	K01110	PTEN	K01110 PTEN; phosphatidylinositol-3,4,5-trisphosphate 3-phosphatase and dual-specificity protein phosphatase PTEN [EC:3.1.3.16 3.1.3.48 3.1.3.67]	GO:0000079//regulation of cyclin-dependent protein serine/threonine kinase activity;GO:0001525//angiogenesis;GO:0001933//negative regulation of protein phosphorylation;GO:0002902//regulation of B cell apoptotic process;GO:0006367//transcription initiation from RNA polymerase II promoter;GO:0006470//protein dephosphorylation;GO:0006661//phosphatidylinositol biosynthetic process;GO:0006915//apoptot…	GO:0004438//phosphatidylinositol-3-phosphatase activity;GO:0004721//phosphoprotein phosphatase activity;GO:0004722//protein serine/threonine phosphatase activity;GO:0004725//protein tyrosine phosphatase activity;GO:0005161//platelet-derived growth factor receptor binding;GO:0005515//protein binding;GO:0008138//protein tyrosine/serine/threonine phosphatase activity;GO:0008289//lipid binding;GO:001…	GO:0005576//extracellular region;GO:0005634//nucleus;GO:0005654//nucleoplasm;GO:0005737//cytoplasm;GO:0005739//mitochondrion;GO:0005829//cytosol;GO:0005886//plasma membrane;GO:0009898//cytoplasmic side of plasma membrane;GO:0016324//apical plasma membrane;GO:0016605//PML body;GO:0035749//myelin sheath adaxonal region;GO:0042995//cell projection;GO:0043005//neuron projection;GO:0043197//dendritic …
ENSG00000185198	0.47	0.19	1.26055	0.018361	up	400668	A0A0A0MR61	PRSS57	NP_001295138.2	serine protease 57 isoform 2 precursor	K23011	PRSS57	K23011 PRSS57; serine protease 57 [EC:3.4.21.-]	GO:0006508//proteolysis	GO:0004252//serine-type endopeptidase activity;GO:0008201//heparin binding;GO:0008236//serine-type peptidase activity	GO:0005615//extracellular space;GO:0035578//azurophil granule lumen
ENSG00000165076	0.03	0.09	-1.72499	0.0310821	down	136242	F8WDA6	PRSS37	NP_001357332.1	probable inactive serine protease 37 isoform 1 precursor				GO:0006508//proteolysis;GO:0007339//binding of sperm to zona pellucida;GO:0016477//cell migration;GO:0051604//protein maturation;GO:0070613//regulation of protein processing;GO:1905516//positive regulation of fertilization;GO:2000344//positive regulation of acrosome reaction	GO:0004252//serine-type endopeptidase activity	GO:0001669//acrosomal vesicle;GO:0005576//extracellular region;GO:0005634//nucleus;GO:0030141//secretory granule
ENSG00000205352	0.04	0	3.53899	0.0217492	up	54458	A0A024RB45	PRR13	NP_060927.1	proline-rich protein 13 isoform 1				-	GO:0005515//protein binding	GO:0005654//nucleoplasm;GO:0005829//cytosol
ENSG00000007062	0.01	0.04	-2.10107	0.0126811	down	8842	O43490	PROM1	XP_016864289.1	prominin-1 isoform X4	K06532	PROM1	K06532 PROM1; prominin 1	GO:0010842//retina layer formation;GO:0045494//photoreceptor cell maintenance;GO:0060042//retina morphogenesis in camera-type eye;GO:0060219//camera-type eye photoreceptor cell differentiation;GO:0072112//glomerular visceral epithelial cell differentiation;GO:0072139//glomerular parietal epithelial cell differentiation;GO:2000768//positive regulation of nephron tubule epithelial cell differentiat…	GO:0005515//protein binding;GO:0015485//cholesterol binding;GO:0042805//actinin binding;GO:0045296//cadherin binding	GO:0001750//photoreceptor outer segment;GO:0005615//extracellular space;GO:0005783//endoplasmic reticulum;GO:0005793//endoplasmic reticulum-Golgi intermediate compartment;GO:0005886//plasma membrane;GO:0005887//integral component of plasma membrane;GO:0005902//microvillus;GO:0005929//cilium;GO:0009986//cell surface;GO:0016324//apical plasma membrane;GO:0031528//microvillus membrane;GO:0031982//ve…
ENSG00000113494	0	0.01	-2.77708	0.0108504	down	5618	P16471	PRLR	NP_001191244.1	prolactin receptor isoform 2 precursor	K05081	PRLR	K05081 PRLR; prolactin receptor	GO:0006694//steroid biosynthetic process;GO:0007166//cell surface receptor signaling pathway;GO:0007171//activation of transmembrane receptor protein tyrosine kinase activity;GO:0007566//embryo implantation;GO:0007595//lactation;GO:0038161//prolactin signaling pathway;GO:0042110//T cell activation;GO:0042976//activation of Janus kinase activity;GO:0043066//negative regulation of apoptotic process…	GO:0004896//cytokine receptor activity;GO:0004925//prolactin receptor activity;GO:0005515//protein binding;GO:0017046//peptide hormone binding;GO:0019955//cytokine binding;GO:0042803//protein homodimerization activity;GO:0042978//ornithine decarboxylase activator activity;GO:0046872//metal ion binding	GO:0005576//extracellular region;GO:0005886//plasma membrane;GO:0009897//external side of plasma membrane;GO:0009986//cell surface;GO:0016021//integral component of membrane;GO:0031904//endosome lumen;GO:0043235//receptor complex
ENSG00000231887	0	0.05	-3.54882	0.0210559	down	5554	A0A087WYT0	PRH1	NP_001278243.1	salivary acidic proline-rich phosphoprotein 1/2 isoform a preproprotein	K13910	PRH1_2	K13910 PRH1_2; salivary acidic proline-rich phosphoprotein 1/2
ENSG00000164256	0.04	0.11	-1.56613	0.00697165	down	56979	Q9NQV7	PRDM9	NP_064612.2	histone-lysine N-methyltransferase PRDM9 isoform PRDM9 B	K20796	PRDM7_9	K20796 PRDM7_9; [histone H3]-lysine4 N-trimethyltransferase PRDM7/9 [EC:2.1.1.354]	GO:0006311//meiotic gene conversion;GO:0006357//regulation of transcription from RNA polymerase II promoter;GO:0010845//positive regulation of reciprocal meiotic recombination;GO:0016584//nucleosome positioning;GO:0051568//histone H3-K4 methylation	GO:0000977//RNA polymerase II regulatory region sequence-specific DNA binding;GO:0000981//RNA polymerase II transcription factor activity, sequence-specific DNA binding;GO:0003700//transcription factor activity, sequence-specific DNA binding;GO:0010844//recombination hotspot binding;GO:0018024//histone-lysine N-methyltransferase activity;GO:0031490//chromatin DNA binding;GO:0042800//histone methy…	GO:0005634//nucleus;GO:0005654//nucleoplasm;GO:0005694//chromosome
ENSG00000126856	0.03	0.1	-1.60643	0.010395	down	11105	Q9NQW5	PRDM7	XP_011521133.1	probable histone-lysine N-methyltransferase PRDM7 isoform X5	K20796	PRDM7_9	K20796 PRDM7_9; [histone H3]-lysine4 N-trimethyltransferase PRDM7/9 [EC:2.1.1.354]	GO:0006357//regulation of transcription from RNA polymerase II promoter;GO:0010845//positive regulation of reciprocal meiotic recombination;GO:0051568//histone H3-K4 methylation	GO:0000977//RNA polymerase II regulatory region sequence-specific DNA binding;GO:0000981//RNA polymerase II transcription factor activity, sequence-specific DNA binding;GO:0003700//transcription factor activity, sequence-specific DNA binding;GO:0005515//protein binding;GO:0031490//chromatin DNA binding;GO:0042800//histone methyltransferase activity (H3-K4 specific);GO:0043565//sequence-specific D…	GO:0005634//nucleus;GO:0005694//chromosome
ENSG00000147596	0	0.02	-3.54764	0.0210937	down	63978	C9JMM8	PRDM14	XP_011515874.1	PR domain zinc finger protein 14 isoform X1				GO:0000122//negative regulation of transcription from RNA polymerase II promoter;GO:0000902//cell morphogenesis;GO:0001708//cell fate specification;GO:0001827//inner cell mass cell fate commitment;GO:0007281//germ cell development;GO:0007566//embryo implantation;GO:0009566//fertilization;GO:0030718//germ-line stem cell population maintenance;GO:0034972//histone H3-R26 methylation;GO:0035019//soma…	GO:0000977//RNA polymerase II regulatory region sequence-specific DNA binding;GO:0000981//RNA polymerase II transcription factor activity, sequence-specific DNA binding;GO:0003700//transcription factor activity, sequence-specific DNA binding;GO:0003723//RNA binding;GO:0005515//protein binding;GO:0008168//methyltransferase activity;GO:0031490//chromatin DNA binding;GO:0043565//sequence-specific DN…	GO:0005634//nucleus;GO:0005654//nucleoplasm
ENSG00000185686	0	0.01	-3.54941	0.0210374	down	23532	A0A024R1E6	PRAME	NP_001278644.1	melanoma antigen preferentially expressed in tumors isoform a
ENSG00000178125	0.06	0.18	-1.47656	0.031151	down	286187	Q7Z4L9	PPP1R42	NP_001335492.1	protein phosphatase 1 regulatory subunit 42 isoform 2	K17579	PPP1R42	K17579 PPP1R42; protein phosphatase 1 regulatory subunit 42	GO:0010921//regulation of phosphatase activity	GO:0003779//actin binding;GO:0015631//tubulin binding;GO:0070840//dynein complex binding	GO:0002177//manchette;GO:0005737//cytoplasm;GO:0005813//centrosome;GO:0005815//microtubule organizing center;GO:0015630//microtubule cytoskeleton
ENSG00000168938	0.29	0.65	-1.17996	0.0122674	down	5480	P45877	PPIC	NP_000934.1	peptidyl-prolyl cis-trans isomerase C precursor	K09563	PPIC	K09563 PPIC; peptidyl-prolyl isomerase C (cyclophilin C) [EC:5.2.1.8]	GO:0000413//protein peptidyl-prolyl isomerization;GO:0042026//protein refolding	GO:0003755//peptidyl-prolyl cis-trans isomerase activity;GO:0005515//protein binding;GO:0016018//cyclosporin A binding;GO:0051082//unfolded protein binding	GO:0005737//cytoplasm;GO:0070062//extracellular exosome
ENSG00000143847	7.15	4.07	0.812951	0.0309514	up	8497	O75335	PPFIA4	XP_011508372.1	liprin-alpha-4 isoform X5				GO:0007269//neurotransmitter secretion;GO:0014047//glutamate secretion	GO:0005515//protein binding	GO:0005829//cytosol;GO:0009986//cell surface;GO:0045202//synapse;GO:0048786//presynaptic active zone
ENSG00000028277	0.04	0.02	1.42474	0.025152	up	5452	A0A0D9SF23	POU2F2	XP_011525345.2	POU domain, class 2, transcription factor 2 isoform X15	K09364	POU2F	K09364 POU2F; POU domain transcription factor, class 2	GO:0002335//mature B cell differentiation;GO:0002380//immunoglobulin secretion involved in immune response;GO:0006366//transcription from RNA polymerase II promoter;GO:0006959//humoral immune response;GO:0042795//snRNA transcription from RNA polymerase II promoter;GO:0045944//positive regulation of transcription from RNA polymerase II promoter;GO:0048469//cell maturation	GO:0000978//RNA polymerase II core promoter proximal region sequence-specific DNA binding;GO:0000981//RNA polymerase II transcription factor activity, sequence-specific DNA binding;GO:0001228//transcriptional activator activity, RNA polymerase II transcription regulatory region sequence-specific binding;GO:0003700//transcription factor activity, sequence-specific DNA binding;GO:0019904//protein d…	GO:0005634//nucleus;GO:0005654//nucleoplasm;GO:0005737//cytoplasm;GO:0043231//intracellular membrane-bounded organelle
ENSG00000188877	0.02	0	3.53885	0.0217538	up	340441		POTEA	NP_001005365.2	POTE ankyrin domain family member A isoform 2	K17299	POTE	K17299 POTE; POTE ankyrin domain family protein
ENSG00000005421	0.05	0.01	1.86354	0.0312089	up	5444	F8WF42	PON1	NP_000437.3	serum paraoxonase/arylesterase 1 precursor	K01045	PON	K01045 PON; arylesterase / paraoxonase [EC:3.1.1.2 3.1.8.1]	GO:0008203//cholesterol metabolic process;GO:0009636//response to toxic substance;GO:0010875//positive regulation of cholesterol efflux;GO:0016311//dephosphorylation;GO:0019372//lipoxygenase pathway;GO:0019439//aromatic compound catabolic process;GO:0031667//response to nutrient levels;GO:0032411//positive regulation of transporter activity;GO:0034445//negative regulation of plasma lipoprotein pa…	GO:0004063//aryldialkylphosphatase activity;GO:0004064//arylesterase activity;GO:0005509//calcium ion binding;GO:0005543//phospholipid binding;GO:0042803//protein homodimerization activity;GO:0102007//acyl-L-homoserine-lactone lactonohydrolase activity	GO:0005576//extracellular region;GO:0005615//extracellular space;GO:0034364//high-density lipoprotein particle;GO:0034366//spherical high-density lipoprotein particle;GO:0043231//intracellular membrane-bounded organelle;GO:0070062//extracellular exosome;GO:0072562//blood microparticle
ENSG00000118557	0.04	0.11	-1.29213	0.0207628	down	83449	Q8TBY8	PMFBP1	NP_112583.2	polyamine-modulated factor 1-binding protein 1 isoform a	K23223	PMFBP1	K23223 PMFBP1; polyamine-modulated factor 1-binding protein 1	GO:0007283//spermatogenesis	GO:0003674//molecular_function	GO:0005737//cytoplasm;GO:0097224//sperm connecting piece
ENSG00000260238	0.22	0.04	2.5108	0.0018025	up	100527963	A0A087WT04	PMF1-BGLAP	NP_001186591.1	PMF1-BGLAP protein isoform 2	K11546	PMF1	K11546 PMF1; polyamine-modulated factor 1
ENSG00000117598	0.01	0	3.53942	0.0217352	up	163404	Q32ZL2	PLPPR5	XP_011539139.1	phospholipid phosphatase-related protein type 5 isoform X2	K19581	LPPR1_2_5	K19581 LPPR1_2_5; lipid phosphate phosphatase-related protein type 1/2/5	GO:0006644//phospholipid metabolic process;GO:0010976//positive regulation of neuron projection development;GO:0046839//phospholipid dephosphorylation;GO:0051491//positive regulation of filopodium assembly	GO:0008195//phosphatidate phosphatase activity;GO:0016791//phosphatase activity;GO:0042577//lipid phosphatase activity	GO:0005886//plasma membrane;GO:0005887//integral component of plasma membrane
XLOC_054870	0.02	0.55	-4.38061	1.33512e-06	down	9842	K7EII8	PLEKHM1	NP_001339754.1	pleckstrin homology domain-containing family M member 1 isoform 2	K23282	PLEKHM1	K23282 PLEKHM1; pleckstrin homology domain-containing family M member 1
ENSG00000154822	0.07	0.03	1.38976	0.0247323	up	23228	H7C276	PLCL2	XP_016861514.1	inactive phospholipase C-like protein 2 isoform X3	K15370	PLCL2	K15370 PLCL2; inactive phospholipase C-like protein 2
ENSG00000122861	0	0.03	-4.09356	0.00517687	down	5328	E7ET40	PLAU	NP_001306120.1	urokinase-type plasminogen activator isoform 3	K01348	PLAU	K01348 PLAU; urokinase plasminogen activator [EC:3.4.21.73]	GO:0001666//response to hypoxia;GO:0006508//proteolysis;GO:0006935//chemotaxis;GO:0007165//signal transduction;GO:0007596//blood coagulation;GO:0010469//regulation of receptor activity;GO:0014909//smooth muscle cell migration;GO:0014910//regulation of smooth muscle cell migration;GO:0030335//positive regulation of cell migration;GO:0031639//plasminogen activation;GO:0033628//regulation of cell ad…	GO:0004252//serine-type endopeptidase activity;GO:0005515//protein binding	GO:0005576//extracellular region;GO:0005615//extracellular space;GO:0005886//plasma membrane;GO:0005925//focal adhesion;GO:0009986//cell surface;GO:0035579//specific granule membrane;GO:0070062//extracellular exosome;GO:0070821//tertiary granule membrane
ENSG00000189129	0.22	0.79	-1.80537	0.000827916	down	219348	Q5JTB6	PLAC9	NP_001012991.1	placenta-specific protein 9 isoform 1 precursor				-	GO:0005515//protein binding	GO:0005576//extracellular region
ENSG00000170890	0.21	0.04	2.11696	0.0271751	up	5319	F8W062	PLA2G1B	NP_000919.1	phospholipase A2 precursor	K01047	PLA2G	K01047 PLA2G; secretory phospholipase A2 [EC:3.1.1.4]	GO:0000187//activation of MAPK activity;GO:0002227//innate immune response in mucosa;GO:0002446//neutrophil mediated immunity;GO:0006633//fatty acid biosynthetic process;GO:0006644//phospholipid metabolic process;GO:0006654//phosphatidic acid biosynthetic process;GO:0007015//actin filament organization;GO:0007165//signal transduction;GO:0008284//positive regulation of cell proliferation;GO:001052…	GO:0004623//phospholipase A2 activity;GO:0005102//receptor binding;GO:0005509//calcium ion binding;GO:0005543//phospholipid binding;GO:0032052//bile acid binding;GO:0047498//calcium-dependent phospholipase A2 activity	GO:0005576//extracellular region;GO:0005615//extracellular space;GO:0005829//cytosol;GO:0009986//cell surface;GO:0030141//secretory granule
ENSG00000277481	0.01	0.03	-1.72627	0.0309567	down	342372	Q7Z443	PKD1L3	XP_016878693.1	polycystic kidney disease protein 1-like 3 isoform X10	K04989	PKD1L3	K04989 PKD1L3; polycystin 1L3	GO:0001581//detection of chemical stimulus involved in sensory perception of sour taste;GO:0001822//kidney development;GO:0006812//cation transport;GO:0050915//sensory perception of sour taste;GO:0050982//detection of mechanical stimulus;GO:0070588//calcium ion transmembrane transport;GO:0071468//cellular response to acidic pH	GO:0005261//cation channel activity;GO:0005262//calcium channel activity;GO:0005515//protein binding;GO:0008324//cation transmembrane transporter activity;GO:0030246//carbohydrate binding;GO:0033040//sour taste receptor activity	GO:0005886//plasma membrane;GO:0009986//cell surface;GO:0016020//membrane;GO:0034703//cation channel complex;GO:0043235//receptor complex;GO:0070062//extracellular exosome
ENSG00000172367	0.02	0	3.53972	0.0217254	up	79849	B0YJ61	PDZD3	XP_016873825.1	Na(+)/H(+) exchange regulatory cofactor NHE-RF4 isoform X5				GO:0006811//ion transport;GO:0006833//water transport;GO:0007168//receptor guanylyl cyclase signaling pathway;GO:0009636//response to toxic substance;GO:0010754//negative regulation of cGMP-mediated signaling;GO:0031283//negative regulation of guanylate cyclase activity	GO:0005515//protein binding;GO:0008022//protein C-terminus binding;GO:0008200//ion channel inhibitor activity;GO:0030251//guanylate cyclase inhibitor activity;GO:1990381//ubiquitin-specific protease binding	GO:0005829//cytosol;GO:0005903//brush border;GO:0035003//subapical complex;GO:0045177//apical part of cell
ENSG00000162493	0.06	0.01	2.86116	0.00112976	up	10630	Q86YL7	PDPN	NP_001006626.1	podoplanin isoform d	K16778	PDPN	K16778 PDPN; podoplanin	GO:0000902//cell morphogenesis;GO:0001946//lymphangiogenesis;GO:0003333//amino acid transmembrane transport;GO:0006833//water transport;GO:0006865//amino acid transport;GO:0007266//Rho protein signal transduction;GO:0008285//negative regulation of cell proliferation;GO:0008360//regulation of cell shape;GO:0010718//positive regulation of epithelial to mesenchymal transition;GO:0015884//folic acid …	GO:0005102//receptor binding;GO:0005372//water transmembrane transporter activity;GO:0005515//protein binding;GO:0008517//folic acid transporter activity;GO:0015171//amino acid transmembrane transporter activity;GO:0015250//water channel activity;GO:0019956//chemokine binding;GO:0051087//chaperone binding	GO:0001726//ruffle;GO:0005829//cytosol;GO:0005886//plasma membrane;GO:0005887//integral component of plasma membrane;GO:0016020//membrane;GO:0016323//basolateral plasma membrane;GO:0016324//apical plasma membrane;GO:0030027//lamellipodium;GO:0030054//cell junction;GO:0030175//filopodium;GO:0031258//lamellipodium membrane;GO:0031410//cytoplasmic vesicle;GO:0031527//filopodium membrane;GO:0031528//…
ENSG00000133256	0	0.03	-2.78074	0.010743	down	5158	H7C4F7	PDE6B	NP_001337084.1	rod cGMP-specific 3\',5\'-cyclic phosphodiesterase subunit beta isoform 5	K13756	PDE6B	K13756 PDE6B; rod cGMP-specific 3',5'-cyclic phosphodiesterase subunit beta [EC:3.1.4.35]	GO:0007186//G-protein coupled receptor signaling pathway;GO:0007223//Wnt signaling pathway, calcium modulating pathway;GO:0007601//visual perception;GO:0007603//phototransduction, visible light;GO:0016056//rhodopsin mediated signaling pathway;GO:0022400//regulation of rhodopsin mediated signaling pathway;GO:0051480//regulation of cytosolic calcium ion concentration;GO:0060041//retina development …	GO:0046872//metal ion binding;GO:0047555//3',5'-cyclic-GMP phosphodiesterase activity	GO:0005886//plasma membrane;GO:0097381//photoreceptor disc membrane
ENSG00000112852	0.04	0.1	-1.29196	0.02078	down	56133	A0A096LPA4	PCDHB2	NP_061759.1	protocadherin beta-2 precursor	K16494	PCDHB	K16494 PCDHB; protocadherin beta	GO:0007155//cell adhesion;GO:0007156//homophilic cell adhesion via plasma membrane adhesion molecules;GO:0007268//chemical synaptic transmission;GO:0007399//nervous system development;GO:0007416//synapse assembly;GO:0016339//calcium-dependent cell-cell adhesion via plasma membrane cell adhesion molecules	GO:0005509//calcium ion binding	GO:0005887//integral component of plasma membrane;GO:0016021//integral component of membrane
ENSG00000140694	0.49	1.36	-1.48612	0.000203131	down	5073	H3BT23	PARN	XP_011520816.1	poly(A)-specific ribonuclease PARN isoform X5	K01148	PARN	K01148 PARN; poly(A)-specific ribonuclease [EC:3.1.13.4]
ENSG00000111845	3.66	1.72	1.08966	0.00557473	up	55003	A0A0S2Z5C3	PAK1IP1	NP_060376.2	p21-activated protein kinase-interacting protein 1	K14830	MAK11	K14830 MAK11; protein MAK11
ENSG00000142619	0.01	0	3.53942	0.0217352	up	51702	Q9ULW8	PADI3	XP_016856952.1	protein-arginine deiminase type-3 isoform X2	K01481	E3.5.3.15	K01481 E3.5.3.15; protein-arginine deiminase [EC:3.5.3.15]
ENSG00000117115	0.01	0.04	-1.6256	0.0446691	down	11240	Q9Y2J8	PADI2	NP_031391.2	protein-arginine deiminase type-2	K01481	E3.5.3.15	K01481 E3.5.3.15; protein-arginine deiminase [EC:3.5.3.15]	GO:0006325//chromatin organization;GO:0010848//regulation of chromatin disassembly;GO:0018101//protein citrullination;GO:0021762//substantia nigra development;GO:0030520//intracellular estrogen receptor signaling pathway;GO:0036413//histone H3-R26 citrullination;GO:0036414//histone citrullination;GO:0043312//neutrophil degranulation;GO:0048096//chromatin-mediated maintenance of transcription;GO:0…	GO:0004668//protein-arginine deiminase activity;GO:0005509//calcium ion binding;GO:0030331//estrogen receptor binding;GO:0042803//protein homodimerization activity	GO:0005576//extracellular region;GO:0005634//nucleus;GO:0005737//cytoplasm;GO:0005829//cytosol;GO:0035327//transcriptionally active chromatin;GO:0035578//azurophil granule lumen;GO:0070062//extracellular exosome
ENSG00000089041	0.01	0	3.83633	0.0107156	up	5027	Q99572	P2RX7	XP_016874855.1	P2X purinoceptor 7 isoform X3	K05220	P2RX7	K05220 P2RX7; P2X purinoceptor 7	GO:0000187//activation of MAPK activity;GO:0000902//cell morphogenesis;GO:0001845//phagolysosome assembly;GO:0001916//positive regulation of T cell mediated cytotoxicity;GO:0002028//regulation of sodium ion transport;GO:0002931//response to ischemia;GO:0006468//protein phosphorylation;GO:0006509//membrane protein ectodomain proteolysis;GO:0006649//phospholipid transfer to membrane;GO:0006812//cat…	GO:0001530//lipopolysaccharide binding;GO:0001614//purinergic nucleotide receptor activity;GO:0004931//extracellular ATP-gated cation channel activity;GO:0005102//receptor binding;GO:0005515//protein binding;GO:0005524//ATP binding;GO:0035381//ATP-gated ion channel activity;GO:0042803//protein homodimerization activity	GO:0005639//integral component of nuclear inner membrane;GO:0005737//cytoplasm;GO:0005886//plasma membrane;GO:0005887//integral component of plasma membrane;GO:0005911//cell-cell junction;GO:0009897//external side of plasma membrane;GO:0016020//membrane;GO:0016021//integral component of membrane;GO:0031594//neuromuscular junction;GO:0032059//bleb;GO:0043025//neuronal cell body;GO:0098793//presyna…
ENSG00000187848	0.01	0.06	-2.92441	0.00631303	down	22953	Q32MC3	P2RX2	XP_016874524.1	P2X purinoceptor 2 isoform X4	K05216	P2RX2	K05216 P2RX2; P2X purinoceptor 2	GO:0001666//response to hypoxia;GO:0002931//response to ischemia;GO:0003029//detection of hypoxic conditions in blood by carotid body chemoreceptor signaling;GO:0006812//cation transport;GO:0007274//neuromuscular synaptic transmission;GO:0007528//neuromuscular junction development;GO:0007596//blood coagulation;GO:0007605//sensory perception of sound;GO:0009743//response to carbohydrate;GO:0010524…	GO:0001614//purinergic nucleotide receptor activity;GO:0004931//extracellular ATP-gated cation channel activity;GO:0005524//ATP binding;GO:0015276//ligand-gated ion channel activity;GO:0035381//ATP-gated ion channel activity;GO:0042802//identical protein binding	GO:0005639//integral component of nuclear inner membrane;GO:0005886//plasma membrane;GO:0005887//integral component of plasma membrane;GO:0016021//integral component of membrane;GO:0016324//apical plasma membrane;GO:0043025//neuronal cell body;GO:0043235//receptor complex;GO:0098794//postsynapse
ENSG00000178602	0.04	0.21	-2.38949	0.0100814	down	150677	Q8NHW6	OTOS	NP_683764.1	otospiralin precursor				GO:0007605//sensory perception of sound	-	GO:0005576//extracellular region
ENSG00000276045	0	0.03	-3.84864	0.0102623	down	84876	A0A0B4J2E8	ORAI1	NP_116179.2	calcium release-activated calcium channel protein 1	K16056	ORAI1	K16056 ORAI1; calcium release-activated calcium channel protein 1	GO:0002115//store-operated calcium entry;GO:0002250//adaptive immune response;GO:0045762//positive regulation of adenylate cyclase activity;GO:0051924//regulation of calcium ion transport;GO:0051928//positive regulation of calcium ion transport;GO:0061180//mammary gland epithelium development;GO:0070509//calcium ion import;GO:0070588//calcium ion transmembrane transport	GO:0005515//protein binding;GO:0005516//calmodulin binding;GO:0015279//store-operated calcium channel activity;GO:0042802//identical protein binding	GO:0005886//plasma membrane;GO:0005887//integral component of plasma membrane;GO:0016020//membrane;GO:0016323//basolateral plasma membrane;GO:0032991//macromolecular complex;GO:0044853//plasma membrane raft;GO:0045121//membrane raft
ENSG00000159961	0.01	0	3.53885	0.0217538	up	8392	P47888	OR3A3	XP_011522330.1	olfactory receptor 3A3 isoform X1	K04257	OLFR	K04257 OLFR; olfactory receptor	GO:0007165//signal transduction;GO:0007186//G-protein coupled receptor signaling pathway;GO:0050911//detection of chemical stimulus involved in sensory perception of smell	GO:0004930//G-protein coupled receptor activity;GO:0004984//olfactory receptor activity	GO:0005886//plasma membrane;GO:0016021//integral component of membrane
ENSG00000172519	0	0	3.53907	0.0217467	up	284433	A0A126GWE9	OR10H5	NP_001004466.1	olfactory receptor 10H5	K04257	OLFR	K04257 OLFR; olfactory receptor	GO:0007187//G-protein coupled receptor signaling pathway, coupled to cyclic nucleotide second messenger;GO:0007268//chemical synaptic transmission;GO:0050911//detection of chemical stimulus involved in sensory perception of smell	GO:0004930//G-protein coupled receptor activity;GO:0004984//olfactory receptor activity;GO:0004993//G-protein coupled serotonin receptor activity;GO:0030594//neurotransmitter receptor activity	GO:0005886//plasma membrane;GO:0005887//integral component of plasma membrane;GO:0030425//dendrite
ENSG00000102837	0.02	0	3.53972	0.0217254	up	10562	A0A024QZ95	OLFM4	NP_006409.3	olfactomedin-4 precursor				GO:0007155//cell adhesion;GO:0010939//regulation of necrotic cell death;GO:0042981//regulation of apoptotic process;GO:0043312//neutrophil degranulation;GO:0050764//regulation of phagocytosis;GO:0051260//protein homooligomerization;GO:1900026//positive regulation of substrate adhesion-dependent cell spreading;GO:2000389//regulation of neutrophil extravasation	GO:0003824//catalytic activity;GO:0005515//protein binding;GO:0042803//protein homodimerization activity;GO:0045296//cadherin binding	GO:0005576//extracellular region;GO:0005615//extracellular space;GO:0005739//mitochondrion;GO:0005886//plasma membrane;GO:0030141//secretory granule;GO:0035580//specific granule lumen;GO:0042581//specific granule;GO:0042582//azurophil granule;GO:0048471//perinuclear region of cytoplasm;GO:0070062//extracellular exosome;GO:1904724//tertiary granule lumen
ENSG00000109205	0.24	0.08	1.53461	0.0148621	up	54959	H0Y8T7	ODAM	NP_060325.3	odontogenic ameloblast-associated protein precursor				GO:0001934//positive regulation of protein phosphorylation;GO:0006954//inflammatory response;GO:0010628//positive regulation of gene expression;GO:0031214//biomineral tissue development;GO:0032956//regulation of actin cytoskeleton organization;GO:0042475//odontogenesis of dentin-containing tooth;GO:0043547//positive regulation of GTPase activity;GO:0044267//cellular protein metabolic process;GO:0…	GO:0005515//protein binding	GO:0005576//extracellular region;GO:0005615//extracellular space;GO:0005634//nucleus;GO:0005737//cytoplasm;GO:0071944//cell periphery;GO:0099512//supramolecular fiber
ENSG00000122543	0.18	0.05	1.74453	0.0468073	up	654231	P0CE72	OCM	NP_001091091.1	oncomodulin-1				-	GO:0005509//calcium ion binding	GO:0005634//nucleus;GO:0005737//cytoplasm
ENSG00000137634	0	0.04	-4.09356	0.00517687	down	54827	Q6UWF7	NXPE4	XP_011541185.1	NXPE family member 4 isoform X3				GO:0008150//biological_process	GO:0003674//molecular_function	GO:0070062//extracellular exosome
ENSG00000228570	0.02	0.07	-1.60968	0.0172568	down	283008	B1AL46	NUTM2E	XP_024303719.1	nUT family member 2E isoform X1
ENSG00000184507	0.03	0.01	1.97125	0.0433152	up	256646	Q86Y26	NUTM1	NP_786883.1	NUT family member 1 isoform 3				-	GO:0005515//protein binding	GO:0005634//nucleus;GO:0005737//cytoplasm
ENSG00000176046	0.73	1.62	-1.14222	0.00322347	down	26471	O60356	NUPR1	NP_036517.1	nuclear protein 1 isoform b	K15626	NUPR1	K15626 NUPR1; nuclear protein, 1	GO:0002526//acute inflammatory response;GO:0006473//protein acetylation;GO:0008283//cell proliferation;GO:0008285//negative regulation of cell proliferation;GO:0008584//male gonad development;GO:0009636//response to toxic substance;GO:0010506//regulation of autophagy;GO:0010507//negative regulation of autophagy;GO:0010667//negative regulation of cardiac muscle cell apoptotic process;GO:0031401//p…	GO:0003677//DNA binding;GO:0003682//chromatin binding;GO:0003713//transcription coactivator activity;GO:0005515//protein binding;GO:0010698//acetyltransferase activator activity	GO:0005634//nucleus;GO:0005737//cytoplasm;GO:0005829//cytosol;GO:0032993//protein-DNA complex;GO:0048471//perinuclear region of cytoplasm
ENSG00000189233	0.01	0.03	-1.98979	0.041197	down	389643	C9JSP2	NUGGC	XP_011542828.1	nuclear GTPase SLIP-GC isoform X4				GO:0033262//regulation of nuclear cell cycle DNA replication;GO:0043066//negative regulation of apoptotic process;GO:0071222//cellular response to lipopolysaccharide	GO:0003924//GTPase activity;GO:0005525//GTP binding	GO:0016607//nuclear speck
ENSG00000162631	0.02	0	2.41397	0.0340619	up	22854	Q9Y2I2	NTNG1	NP_001106697.1	netrin-G1 isoform G1a preproprotein	K07522	NTNG1	K07522 NTNG1; netrin-G1	GO:0007409//axonogenesis;GO:0008045//motor neuron axon guidance;GO:0009887//animal organ morphogenesis;GO:0009888//tissue development;GO:0050804//modulation of synaptic transmission;GO:0099560//synaptic membrane adhesion	GO:0005515//protein binding;GO:0050839//cell adhesion molecule binding;GO:0098632//protein binding involved in cell-cell adhesion	GO:0005576//extracellular region;GO:0005886//plasma membrane;GO:0046658//anchored component of plasma membrane;GO:0098978//glutamatergic synapse;GO:0099029//anchored component of presynaptic active zone membrane
ENSG00000123572	0.02	0.01	1.59717	0.0338564	up	203447	B7Z1I7	NRK	XP_011529189.1	nik-related protein kinase isoform X3	K16313	NRK	K16313 NRK; Nik-related protein kinase [EC:2.7.11.1]	GO:0000165//MAPK cascade;GO:0007256//activation of JNKK activity;GO:0007567//parturition;GO:0008285//negative regulation of cell proliferation;GO:0023014//signal transduction by protein phosphorylation;GO:0031098//stress-activated protein kinase signaling cascade;GO:0031532//actin cytoskeleton reorganization;GO:0032147//activation of protein kinase activity;GO:0048812//neuron projection morphogen…	GO:0004674//protein serine/threonine kinase activity;GO:0005524//ATP binding	GO:0005737//cytoplasm
ENSG00000120937	0.31	0.05	2.51193	0.00179346	up	4879	P16860	NPPB	NP_002512.1	natriuretic peptides B preproprotein	K12335	NPPB	K12335 NPPB; natriuretic peptide B	GO:0003085//negative regulation of systemic arterial blood pressure;GO:0006182//cGMP biosynthetic process;GO:0006457//protein folding;GO:0007166//cell surface receptor signaling pathway;GO:0007168//receptor guanylyl cyclase signaling pathway;GO:0007218//neuropeptide signaling pathway;GO:0007589//body fluid secretion;GO:0008217//regulation of blood pressure;GO:0016525//negative regulation of angio…	GO:0005102//receptor binding;GO:0005179//hormone activity;GO:0005515//protein binding;GO:0008613//diuretic hormone activity;GO:0051427//hormone receptor binding	GO:0005576//extracellular region;GO:0005615//extracellular space;GO:0005634//nucleus;GO:0005737//cytoplasm;GO:0032991//macromolecular complex
ENSG00000243716	0.17	0.32	-0.908947	0.0305317	down	100132247	C9JGN3	NPIPB5	NP_001129337.1	nuclear pore complex interacting protein family member				-	-	GO:0005654//nucleoplasm;GO:0016021//integral component of membrane
XLOC_054823	0.25	0.66	-1.41643	0.00411151	down	642778	F8WFD2	NPIPA3	XP_011520887.1	nuclear pore complex-interacting protein family member A3 isoform X8				-
ENSG00000148734	0	0.01	-4.30414	0.00266384	down	64106	Q9GZQ6	NPFFR1	NP_071429.1	neuropeptide FF receptor 1	K04240	NPFFR1	K04240 NPFFR1; neuropeptide FF receptor 1	GO:0007186//G-protein coupled receptor signaling pathway;GO:0007218//neuropeptide signaling pathway;GO:0008150//biological_process;GO:0032870//cellular response to hormone stimulus	GO:0004930//G-protein coupled receptor activity;GO:0008188//neuropeptide receptor activity	GO:0005886//plasma membrane;GO:0005887//integral component of plasma membrane;GO:0005929//cilium
ENSG00000196408	0.11	0.31	-1.41878	0.00923299	down	124056	H3BN18	NOXO1	NP_653204.1	NADPH oxidase organizer 1 isoform a	K17934	NOXO1	K17934 NOXO1; NADPH oxidase organizer 1	GO:0006801//superoxide metabolic process;GO:0010310//regulation of hydrogen peroxide metabolic process;GO:0022617//extracellular matrix disassembly;GO:0043085//positive regulation of catalytic activity;GO:0060263//regulation of respiratory burst	GO:0005515//protein binding;GO:0005543//phospholipid binding;GO:0016176//superoxide-generating NADPH oxidase activator activity;GO:0019899//enzyme binding;GO:0035091//phosphatidylinositol binding	GO:0005886//plasma membrane;GO:0043020//NADPH oxidase complex
ENSG00000196943	0.25	0.51	-1.05205	0.00938274	down	161424	H0YJP7	NOP9	XP_011534828.1	nucleolar protein 9 isoform X2	K14790	NOP9	K14790 NOP9; nucleolar protein 9
ENSG00000173572	0.01	0	3.53942	0.0217352	up	126204	Q86W25	NLRP13	NP_789780.2	NACHT, LRR and PYD domains-containing protein 13 isoform 1	K22665	NLRP13	K22665 NLRP13; NACHT, LRR and PYD domains-containing protein 13	-	GO:0005524//ATP binding	-
ENSG00000169992	0.09	0.03	1.40551	0.012597	up	57555	I3L498	NLGN2	XP_016880386.1	neuroligin-2 isoform X2	K07378	NLGN	K07378 NLGN; neuroligin
ENSG00000125816	0	0.03	-3.54922	0.0210434	down	644524	Q9H2Z4	NKX2-4	NP_149416.1	homeobox protein Nkx-2.4	K09344	NKX2-4	K09344 NKX2-4; homeobox protein Nkx-2.4	GO:0007275//multicellular organism development;GO:0008150//biological_process;GO:0030154//cell differentiation;GO:0045944//positive regulation of transcription from RNA polymerase II promoter	GO:0000978//RNA polymerase II core promoter proximal region sequence-specific DNA binding;GO:0000981//RNA polymerase II transcription factor activity, sequence-specific DNA binding;GO:0003674//molecular_function;GO:0003700//transcription factor activity, sequence-specific DNA binding;GO:0043565//sequence-specific DNA binding	GO:0005575//cellular_component;GO:0005634//nucleus
ENSG00000105374	0.2	0.01	3.3767	0.000862071	up	4818	M0R0D6	NKG7	NP_001350622.1	protein NKG7 isoform 2				-	GO:0005515//protein binding	GO:0005886//plasma membrane;GO:0005887//integral component of plasma membrane
ENSG00000111859	0	0.03	-3.18192	0.00217825	down	4739	A0A087WUD2	NEDD9	NP_892011.2	enhancer of filamentation 1 isoform 2	K16832	NEDD9	K16832 NEDD9; enhancer of filamentation 1	GO:0007010//cytoskeleton organization;GO:0007049//cell cycle;GO:0007155//cell adhesion;GO:0007165//signal transduction;GO:0007229//integrin-mediated signaling pathway;GO:0016477//cell migration;GO:0030335//positive regulation of cell migration;GO:0040008//regulation of growth;GO:0051017//actin filament bundle assembly;GO:0051301//cell division;GO:0061098//positive regulation of protein tyrosine k…	GO:0005515//protein binding;GO:1990782//protein tyrosine kinase binding	GO:0000922//spindle pole;GO:0005634//nucleus;GO:0005654//nucleoplasm;GO:0005737//cytoplasm;GO:0005794//Golgi apparatus;GO:0005819//spindle;GO:0005829//cytosol;GO:0005886//plasma membrane;GO:0005925//focal adhesion;GO:0005938//cell cortex;GO:0030027//lamellipodium
ENSG00000173376	3.35	1.95	0.7792	0.042005	up	79625	D6RF18	NDNF	XP_024309980.1	protein NDNF isoform X1				GO:0001525//angiogenesis;GO:0001764//neuron migration;GO:0002931//response to ischemia;GO:0007263//nitric oxide mediated signal transduction;GO:0010811//positive regulation of cell-substrate adhesion;GO:0010976//positive regulation of neuron projection development;GO:0019800//peptide cross-linking via chondroitin 4-sulfate glycosaminoglycan;GO:0030198//extracellular matrix organization;GO:0043524…	GO:0005539//glycosaminoglycan binding;GO:0008201//heparin binding	GO:0005576//extracellular region;GO:0031012//extracellular matrix
ENSG00000167011	0.33	0.17	0.98309	0.0312167	up	375607	Q8N8M0	NAT16	XP_024302527.1	probable N-acetyltransferase 16 isoform X2				-	GO:0016747//transferase activity, transferring acyl groups other than amino-acyl groups	-
ENSG00000249437	0.01	0.02	-2.13576	0.0256975	down	4671	Q13075	NAIP	NP_001333799.1	baculoviral IAP repeat-containing protein 1 isoform 1	K12807	NAIP	K12807 NAIP; baculoviral IAP repeat-containing protein 1
ENSG00000253506	0.07	0	3.83578	0.0107263	up	342538	Q9H009	NACA2	NP_954984.1	nascent polypeptide-associated complex subunit alpha-2				GO:0015031//protein transport	-	GO:0005634//nucleus;GO:0005854//nascent polypeptide-associated complex
ENSG00000196132	0.21	0.11	0.905685	0.0396781	up	4661	Q6P6D5	MYT1	NP_004526.1	myelin transcription factor 1	K23192	MYT1	K23192 MYT1; myelin transcription factor 1
ENSG00000170011	0.01	0	3.53929	0.0217396	up	25924	Q8NFW9	MYRIP	NP_001271355.1	rab effector MyRIP isoform d	K22237	MYRIP	K22237 MYRIP; Rab effector MyRIP	GO:0006886//intracellular protein transport;GO:0032024//positive regulation of insulin secretion	GO:0003779//actin binding;GO:0005515//protein binding;GO:0008270//zinc ion binding;GO:0017022//myosin binding;GO:0017137//Rab GTPase binding;GO:0051018//protein kinase A binding	GO:0000145//exocyst;GO:0001750//photoreceptor outer segment;GO:0030133//transport vesicle;GO:0030864//cortical actin cytoskeleton;GO:0031045//dense core granule;GO:0042470//melanosome;GO:0045202//synapse;GO:0048471//perinuclear region of cytoplasm
ENSG00000283683	0	0.02	-3.54931	0.0210404	down	110806290	A0A1B0GUC4	MYOCOS	NP_001355093.1	myocilin opposite strand protein
XLOC_055214	0.05	0.5	-3.3447	1.0279e-06	down	4439	A2ABF1	MSH5	NP_002432.1	mutS protein homolog 5 isoform c	K08741	MSH5	K08741 MSH5; DNA mismatch repair protein MSH5
ENSG00000134042	0.02	0.07	-1.60772	0.00821794	down	83876	A0A024R2B7	MRO	XP_016881524.1	protein maestro isoform X1				-	-	GO:0005730//nucleolus
ENSG00000278619	1.53	0.73	1.05282	0.00984251	up	79922	A0A087WZC1	MRM1	XP_011523578.1	rRNA methyltransferase 1, mitochondrial isoform X2	K15507	MRM1	K15507 MRM1; 21S rRNA (GM2251-2'-O)-methyltransferase [EC:2.1.1.-]
ENSG00000142606	0.09	0.02	2.11188	0.00308958	up	79258	Q495T6	MMEL1	XP_016857804.1	membrane metallo-endopeptidase-like 1 isoform X6	K08635	MMEL1	K08635 MMEL1; neprilysin [EC:3.4.24.11]
ENSG00000275023	0	0.02	-2.70192	0.00254928	down	4302	A0A087WVY1	MLLT6	NP_005928.2	protein AF-17	K23588	MLLT6_10	K23588 MLLT6_10; protein AF-17/10
ENSG00000141741	0.04	0.01	2.41466	0.0340111	up	84299	J3KTI2	MIEN1	NP_001317135.1	migration and invasion enhancer 1 isoform 2	K07401	K07401	K07401 K07401; selenoprotein W-related protein	GO:0006915//apoptotic process;GO:0010269//response to selenium ion;GO:0030335//positive regulation of cell migration;GO:0043066//negative regulation of apoptotic process;GO:0051491//positive regulation of filopodium assembly	GO:0005515//protein binding	GO:0005829//cytosol;GO:0031235//intrinsic component of the cytoplasmic side of the plasma membrane
ENSG00000177427	0.61	0.32	0.934683	0.0251553	up	125170	Q96C03	MIEF2	NP_631901.2	mitochondrial dynamics protein MID49 isoform 1	K23507	MIEF1_2	K23507 MIEF1_2; mitochondrial dynamics protein MID51/49
XLOC_055082	0.21	0.11	0.924766	0.0476134	up	4277	F5H7Q8	MICB	NP_001276089.1	MHC class I polypeptide-related sequence B isoform 2	K07985	MIC	K07985 MIC; MHC class I-related protein
XLOC_055172	0.01	0.08	-2.61501	0.0187046	down	100507436	A0A024RCL3	MICA	NP_001276082.1	MHC class I polypeptide-related sequence A isoform 3 (MICA*00801)	K07985	MIC	K07985 MIC; MHC class I-related protein
ENSG00000161091	6.97	11.9	-0.772362	0.0409964	down	126321	Q9HBP8	MFSD12	NP_778148.2	major facilitator superfamily domain-containing protein 12 isoform c				GO:0008643//carbohydrate transport;GO:0055085//transmembrane transport;GO:0071702//organic substance transport	GO:0005215//transporter activity;GO:0015293//symporter activity	GO:0005765//lysosomal membrane;GO:0005887//integral component of plasma membrane
ENSG00000166482	0.09	0.21	-1.26863	0.0260439	down	4239	P55083	MFAP4	NP_002395.1	microfibril-associated glycoprotein 4 isoform 2 precursor				GO:0007155//cell adhesion;GO:0009650//UV protection;GO:0010712//regulation of collagen metabolic process;GO:0048251//elastic fiber assembly;GO:0071493//cellular response to UV-B;GO:0097435//fibril organization	GO:0005201//extracellular matrix structural constituent;GO:0005515//protein binding	GO:0001527//microfibril;GO:0005576//extracellular region;GO:0071953//elastic fiber
ENSG00000167077	0.01	0.04	-1.9144	0.0145443	down	150365	F5GZT0	MEI1	XP_011528256.1	meiosis inhibitor protein 1 isoform X20				GO:0007141//male meiosis I;GO:0007286//spermatid development;GO:0045141//meiotic telomere clustering	-	GO:0005623//cell
ENSG00000103313	0.04	0.09	-1.32758	0.0285251	down	4210	D2DTW1	MEFV	NP_001185465.1	pyrin isoform 2	K12803	MEFV	K12803 MEFV; pyrin	GO:0006954//inflammatory response;GO:0010508//positive regulation of autophagy;GO:0032691//negative regulation of interleukin-1 beta production;GO:0032695//negative regulation of interleukin-12 production;GO:0034341//response to interferon-gamma;GO:0050728//negative regulation of inflammatory response;GO:0071641//negative regulation of macrophage inflammatory protein 1 alpha production;GO:1900016…	GO:0003779//actin binding;GO:0005515//protein binding;GO:0008270//zinc ion binding;GO:0042802//identical protein binding	GO:0001726//ruffle;GO:0005634//nucleus;GO:0005737//cytoplasm;GO:0005776//autophagosome;GO:0005829//cytosol;GO:0005874//microtubule;GO:0005875//microtubule associated complex;GO:0030027//lamellipodium;GO:0031410//cytoplasmic vesicle
ENSG00000170948	0	0.05	-3.54892	0.0210529	down	85509	Q8WWY6	MBD3L1	NP_660209.2	methyl-CpG-binding domain protein 3-like 1				GO:0000122//negative regulation of transcription from RNA polymerase II promoter;GO:0006346//methylation-dependent chromatin silencing	GO:0005515//protein binding;GO:0008327//methyl-CpG binding	GO:0005634//nucleus
ENSG00000152939	0.01	0.04	-1.61587	0.0317277	down	153562	A1BQX2	MARVELD2	NP_001033692.2	MARVEL domain-containing protein 2 isoform 1	K17291	MARVELD2	K17291 MARVELD2; MARVEL domain-containing protein 2
ENSG00000165509	0.04	0.01	2.41467	0.0340105	up	139081	Q3SYA6	MAGEC3	NP_803251.1	melanoma-associated antigen C3 isoform 2
ENSG00000182798	0.11	0.25	-1.23939	0.0334658	down	645864	A8MXT2	MAGEB17	NP_001264236.1	melanoma-associated antigen B17
ENSG00000143194	0.26	0.09	1.45143	0.00539591	up	84944	Q96JY0	MAEL	XP_016858092.1	protein maelstrom homolog isoform X3	K18411	MAEL	K18411 MAEL; protein maelstrom	GO:0000122//negative regulation of transcription from RNA polymerase II promoter;GO:0000902//cell morphogenesis;GO:0007129//synapsis;GO:0007140//male meiosis;GO:0007275//multicellular organism development;GO:0007283//spermatogenesis;GO:0008630//intrinsic apoptotic signaling pathway in response to DNA damage;GO:0009566//fertilization;GO:0030154//cell differentiation;GO:0031047//gene silencing by R…	GO:0000981//RNA polymerase II transcription factor activity, sequence-specific DNA binding;GO:0043565//sequence-specific DNA binding	GO:0000785//chromatin;GO:0001741//XY body;GO:0005634//nucleus;GO:0005737//cytoplasm;GO:0030849//autosome;GO:0033391//chromatoid body;GO:0043186//P granule;GO:0048471//perinuclear region of cytoplasm;GO:0071547//piP-body
ENSG00000179796	0.01	0	4.08239	0.00542958	up	116135	A0A024R2R0	LRRC3B	XP_011531634.1	leucine-rich repeat-containing protein 3B isoform X1				-	-	GO:0005615//extracellular space;GO:0016021//integral component of membrane;GO:0031012//extracellular matrix
ENSG00000147145	0	0.02	-3.54843	0.0210685	down	2846	Q99677	LPAR4	NP_005287.1	lysophosphatidic acid receptor 4	K04275	LPAR4	K04275 LPAR4; lysophosphatidic acid receptor 4	GO:0007186//G-protein coupled receptor signaling pathway;GO:0035025//positive regulation of Rho protein signal transduction;GO:0051482//positive regulation of cytosolic calcium ion concentration involved in phospholipase C-activating G-protein coupled signaling pathway	GO:0004930//G-protein coupled receptor activity;GO:0035727//lysophosphatidic acid binding;GO:0070915//lysophosphatidic acid receptor activity	GO:0005886//plasma membrane;GO:0005887//integral component of plasma membrane;GO:0016604//nuclear body;GO:0043231//intracellular membrane-bounded organelle
ENSG00000138131	0.39	0.18	1.09559	0.0123663	up	84171	Q96JB6	LOXL4	XP_006718083.1	lysyl oxidase homolog 4 isoform X1	K00280	LOXL2_3_4	K00280 LOXL2_3_4; lysyl oxidase-like protein 2/3/4 [EC:1.4.3.-]	GO:0006897//endocytosis;GO:0018057//peptidyl-lysine oxidation;GO:0030199//collagen fibril organization	GO:0004720//protein-lysine 6-oxidase activity;GO:0005044//scavenger receptor activity;GO:0005507//copper ion binding;GO:0005515//protein binding	GO:0005615//extracellular space;GO:0016020//membrane;GO:0043235//receptor complex;GO:0070062//extracellular exosome
ENSG00000277117	0.24	0.47	-0.932026	0.0298022	down	102723996	A0A087X1L8	LOC102723996	XP_011544381.1	ICOS ligand isoform X3	K06710	ICOSLG	K06710 ICOSLG; inducible T-cell co-stimulator ligand	GO:0006955//immune response;GO:0007165//signal transduction;GO:0007166//cell surface receptor signaling pathway;GO:0031295//T cell costimulation;GO:0042102//positive regulation of T cell proliferation;GO:0042130//negative regulation of T cell proliferation;GO:0071222//cellular response to lipopolysaccharide	-	GO:0009897//external side of plasma membrane;GO:0009986//cell surface;GO:0016021//integral component of membrane
ENSG00000157224	0.08	0.17	-1.08278	0.0311571	down	102723899	C9J4P0	LOC102723899	NP_001352372.1	uncharacterized protein LOC102723899 precursor				GO:0016338//calcium-independent cell-cell adhesion via plasma membrane cell-adhesion molecules	GO:0005515//protein binding;GO:0042802//identical protein binding	GO:0005886//plasma membrane;GO:0005923//bicellular tight junction;GO:0016021//integral component of membrane;GO:0016328//lateral plasma membrane
ENSG00000275869	0.02	0.13	-2.28781	0.00556825	down	102723713		LOC102723713	XP_011544540.1	tP53-target gene 3 protein
ENSG00000277991	0.01	0.04	-1.84718	0.00519577	down	102723360		LOC102723360	XP_024307801.1	uncharacterized protein LOC102723360 isoform X3
ENSG00000131737	0	0.05	-4.30161	0.00268009	down	100653049	O76011	LOC100653049	XP_003403930.1	keratin, type I cuticular Ha4 isoform X1	K07604	KRT1	K07604 KRT1; type I keratin, acidic	GO:0008544//epidermis development;GO:0031424//keratinization;GO:0070268//cornification	GO:0005198//structural molecule activity	GO:0005615//extracellular space;GO:0005829//cytosol;GO:0005882//intermediate filament
ENSG00000204021	0.07	0.01	2.41396	0.0340621	up	643414	Q5VXJ0	LIPK	XP_011538384.1	lipase member K isoform X8				GO:0016042//lipid catabolic process;GO:0044255//cellular lipid metabolic process;GO:0070268//cornification	GO:0016298//lipase activity	GO:0005576//extracellular region;GO:0043231//intracellular membrane-bounded organelle
ENSG00000267453	0.02	0.25	-3.17873	0.00220241	down	102724279		LINC01835	NP_001289422.1	uncharacterized protein LOC102724279
ENSG00000156959	0.02	0.01	2.24995	0.0170526	up	375323	Q7Z7J7	LHFPL4	XP_016861849.1	LHFPL tetraspan subfamily member 4 protein isoform X2				GO:0097112//gamma-aminobutyric acid receptor clustering	GO:0005515//protein binding;GO:0050811//GABA receptor binding	GO:0016021//integral component of membrane;GO:0030054//cell junction;GO:0030425//dendrite;GO:0045211//postsynaptic membrane;GO:0060077//inhibitory synapse
ENSG00000146166	0.04	0.13	-1.59995	0.00200232	down	51557	Q5TDP6	LGSN	NP_001137412.1	lengsin isoform b				GO:0006542//glutamine biosynthetic process;GO:0019740//nitrogen utilization	GO:0004356//glutamate-ammonia ligase activity	GO:0005886//plasma membrane;GO:0016020//membrane
ENSG00000108231	0.01	0	3.53972	0.0217254	up	9211	A0A0S2Z4X3	LGI1	NP_005088.1	leucine-rich glioma-inactivated protein 1 isoform 1 precursor				GO:0007399//nervous system development;GO:0007411//axon guidance;GO:0030307//positive regulation of cell growth;GO:0031175//neuron projection development;GO:0050806//positive regulation of synaptic transmission;GO:0051260//protein homooligomerization;GO:0099645//neurotransmitter receptor localization to postsynaptic specialization membrane	GO:0005102//receptor binding;GO:0005515//protein binding	GO:0005576//extracellular region;GO:0005615//extracellular space;GO:0030054//cell junction;GO:0043083//synaptic cleft;GO:0098978//glutamatergic synapse
ENSG00000168961	0.07	0.16	-1.21628	0.0234738	down	3965	J3QS92	LGALS9	XP_016880112.1	galectin-9 isoform X1	K10093	LGALS9	K10093 LGALS9; galectin-9	GO:0002519//natural killer cell tolerance induction;GO:0006935//chemotaxis;GO:0006954//inflammatory response;GO:0007565//female pregnancy;GO:0010628//positive regulation of gene expression;GO:0010629//negative regulation of gene expression;GO:0032496//response to lipopolysaccharide;GO:0032673//regulation of interleukin-4 production;GO:0032674//regulation of interleukin-5 production;GO:0032682//ne…	GO:0005534//galactose binding;GO:0016936//galactoside binding;GO:0019899//enzyme binding;GO:0030246//carbohydrate binding;GO:0048030//disaccharide binding	GO:0005615//extracellular space;GO:0005634//nucleus;GO:0005737//cytoplasm;GO:0005829//cytosol
ENSG00000167615	0.27	0.14	0.897609	0.0357962	up	114823	Q96PV6	LENG8	XP_006723060.1	leukocyte receptor cluster member 8 isoform X4
ENSG00000136167	0.07	0.02	1.53143	0.0189941	up	3936	A0A024RDT4	LCP1	XP_005266431.1	plastin-2 isoform X1	K17276	LCP1	K17276 LCP1; plastin-2	GO:0002286//T cell activation involved in immune response;GO:0010737//protein kinase A signaling;GO:0016477//cell migration;GO:0022617//extracellular matrix disassembly;GO:0031100//animal organ regeneration;GO:0033157//regulation of intracellular protein transport;GO:0035722//interleukin-12-mediated signaling pathway;GO:0044319//wound healing, spreading of cells;GO:0051017//actin filament bundle …	GO:0003779//actin binding;GO:0005178//integrin binding;GO:0005509//calcium ion binding;GO:0042802//identical protein binding;GO:0051015//actin filament binding;GO:0051020//GTPase binding	GO:0001725//stress fiber;GO:0001726//ruffle;GO:0001891//phagocytic cup;GO:0002102//podosome;GO:0005615//extracellular space;GO:0005737//cytoplasm;GO:0005829//cytosol;GO:0005884//actin filament;GO:0005886//plasma membrane;GO:0005925//focal adhesion;GO:0015629//actin cytoskeleton;GO:0030054//cell junction;GO:0030175//filopodium;GO:0032432//actin filament bundle;GO:0032587//ruffle membrane;GO:004847…
ENSG00000170477	0.02	0.08	-1.72474	0.0311068	down	3851	F8VZR6	KRT4	NP_002263.3	keratin, type II cytoskeletal 4	K07605	KRT2	K07605 KRT2; type II keratin, basic	GO:0007010//cytoskeleton organization;GO:0030855//epithelial cell differentiation;GO:0031424//keratinization;GO:0050680//negative regulation of epithelial cell proliferation;GO:0070268//cornification	GO:0005515//protein binding	GO:0005634//nucleus;GO:0005829//cytosol;GO:0005882//intermediate filament;GO:0009986//cell surface;GO:0045095//keratin filament;GO:0045111//intermediate filament cytoskeleton
ENSG00000171345	0.08	0.02	2.11696	0.0271756	up	3880	C9JM50	KRT19	NP_002267.2	keratin, type I cytoskeletal 19	K07604	KRT1	K07604 KRT1; type I keratin, acidic	GO:0007219//Notch signaling pathway;GO:0016032//viral process;GO:0031424//keratinization;GO:0043627//response to estrogen;GO:0045214//sarcomere organization;GO:0060706//cell differentiation involved in embryonic placenta development;GO:0070268//cornification	GO:0005200//structural constituent of cytoskeleton;GO:0005515//protein binding;GO:0008307//structural constituent of muscle;GO:0044877//macromolecular complex binding	GO:0005829//cytosol;GO:0005882//intermediate filament;GO:0005886//plasma membrane;GO:0016010//dystrophin-associated glycoprotein complex;GO:0016327//apicolateral plasma membrane;GO:0030018//Z disc;GO:0042383//sarcolemma;GO:0043034//costamere;GO:0070062//extracellular exosome;GO:0071944//cell periphery;GO:1990357//terminal web
ENSG00000124743	0.14	0.07	0.926473	0.0482569	up	401265	Q9H511	KLHL31	XP_016866347.1	kelch-like protein 31 isoform X1	K10467	KLHL31	K10467 KLHL31; kelch-like protein 31	GO:0001933//negative regulation of protein phosphorylation;GO:0046329//negative regulation of JNK cascade	-	GO:0005634//nucleus;GO:0005737//cytoplasm
ENSG00000161594	0.19	0.07	1.42019	0.0154177	up	317719	C9JHB3	KLHL10	NP_001316525.1	kelch-like protein 10 isoform 2	K10448	KLHL10	K10448 KLHL10; kelch-like protein 10	GO:0000902//cell morphogenesis;GO:0007286//spermatid development;GO:0008584//male gonad development;GO:0009566//fertilization;GO:0016567//protein ubiquitination;GO:0048808//male genitalia morphogenesis;GO:0048873//homeostasis of number of cells within a tissue	-	GO:0005737//cytoplasm
ENSG00000283039	0.01	0.05	-1.61978	0.0454369	down	105378952	A0A0U1RQI7	KLF18	NP_001345367.1	Kruppel-like factor 18				GO:0006357//regulation of transcription from RNA polymerase II promoter	GO:0000981//RNA polymerase II transcription factor activity, sequence-specific DNA binding;GO:0003676//nucleic acid binding;GO:0046872//metal ion binding	GO:0005634//nucleus
ENSG00000157404	0.01	0	4.08206	0.00543337	up	3815	A0A024RDA0	KIT	NP_000213.1	mast/stem cell growth factor receptor Kit isoform 1 precursor	K05091	KIT	K05091 KIT; proto-oncogene tyrosine-protein kinase Kit [EC:2.7.10.1]	GO:0000165//MAPK cascade;GO:0000187//activation of MAPK activity;GO:0001541//ovarian follicle development;GO:0002244//hematopoietic progenitor cell differentiation;GO:0002318//myeloid progenitor cell differentiation;GO:0002320//lymphoid progenitor cell differentiation;GO:0002327//immature B cell differentiation;GO:0002371//dendritic cell cytokine production;GO:0002551//mast cell chemotaxis;GO:000…	GO:0002020//protease binding;GO:0004713//protein tyrosine kinase activity;GO:0004714//transmembrane receptor protein tyrosine kinase activity;GO:0005020//stem cell factor receptor activity;GO:0005515//protein binding;GO:0005524//ATP binding;GO:0019955//cytokine binding;GO:0042169//SH2 domain binding;GO:0042803//protein homodimerization activity;GO:0046872//metal ion binding	GO:0001669//acrosomal vesicle;GO:0005615//extracellular space;GO:0005886//plasma membrane;GO:0005887//integral component of plasma membrane;GO:0005911//cell-cell junction;GO:0009897//external side of plasma membrane;GO:0009898//cytoplasmic side of plasma membrane;GO:0042629//mast cell granule;GO:0043235//receptor complex
XLOC_055318	1.34	0.69	0.958983	0.0173816	up	3833	A0A087X1W5	KIFC1	XP_016866326.1	kinesin-like protein KIFC1 isoform X3	K10405	KIFC1	K10405 KIFC1; kinesin family member C1
ENSG00000130294	0	0.01	-4.30053	0.00268712	down	547	C9JBH1	KIF1A	NP_004312.2	kinesin-like protein KIF1A isoform 2	K10392	KIF1	K10392 KIF1; kinesin family member 1	GO:0007018//microtubule-based movement;GO:0008089//anterograde axonal transport;GO:0016192//vesicle-mediated transport;GO:0022027//interkinetic nuclear migration;GO:0030705//cytoskeleton-dependent intracellular transport;GO:0098840//protein transport along microtubule;GO:1990048//anterograde neuronal dense core vesicle transport;GO:1990049//retrograde neuronal dense core vesicle transport	GO:0003774//motor activity;GO:0003777//microtubule motor activity;GO:0005524//ATP binding;GO:0008017//microtubule binding;GO:0008574//ATP-dependent microtubule motor activity, plus-end-directed;GO:0016887//ATPase activity;GO:0042802//identical protein binding;GO:0042803//protein homodimerization activity	GO:0005829//cytosol;GO:0005871//kinesin complex;GO:0005874//microtubule;GO:0008021//synaptic vesicle;GO:0030424//axon;GO:0030425//dendrite;GO:0043005//neuron projection;GO:0043025//neuronal cell body;GO:0098794//postsynapse;GO:1904115//axon cytoplasm
ENSG00000257093	0.15	0.26	-0.845562	0.0425512	down	57189	C9J7X6	KIAA1147	NP_001073861.1	protein LCHN
ENSG00000162687	0.01	0.03	-1.70149	0.02245	down	343450	Q3SY61	KCNT2	XP_016856669.1	potassium channel subfamily T member 2 isoform X4	K04947	KCNT2	K04947 KCNT2; potassium channel subfamily T member 2	GO:0042391//regulation of membrane potential;GO:0097623//potassium ion export across plasma membrane	GO:0005228//intracellular sodium activated potassium channel activity;GO:0005524//ATP binding;GO:0015271//outward rectifier potassium channel activity;GO:0070089//chloride-activated potassium channel activity	GO:0005886//plasma membrane;GO:0016021//integral component of membrane
XLOC_055001	5.65	2.15	1.39045	0.000483539	up	3785	A0A0D9SGJ7	KCNQ2	NP_742107.1	potassium voltage-gated channel subfamily KQT member 2 isoform e	K04927	KCNQ2	K04927 KCNQ2; potassium voltage-gated channel KQT-like subfamily member 2	GO:0007268//chemical synaptic transmission;GO:0007399//nervous system development;GO:0034765//regulation of ion transmembrane transport;GO:0071805//potassium ion transmembrane transport
XLOC_054759	0.18	0.07	1.40408	0.0335592	up	3784	A0A2R8YDV1	KCNQ1	NP_861463.1	potassium voltage-gated channel subfamily KQT member 1 isoform 2 precursor	K04926	KCNQ1	K04926 KCNQ1; potassium voltage-gated channel KQT-like subfamily member 1	GO:0006349//regulation of gene expression by genetic imprinting;GO:0007605//sensory perception of sound;GO:0008016//regulation of heart contraction;GO:0010460//positive regulation of heart rate;GO:0016458//gene silencing;GO:0035690//cellular response to drug;GO:0048839//inner ear development;GO:0050892//intestinal absorption;GO:0060048//cardiac muscle contraction;GO:0060306//regulation of membran…
ENSG00000151704	0	0.01	-3.54931	0.0210404	down	3758	A0A024R3K6	KCNJ1	NP_722451.1	ATP-sensitive inward rectifier potassium channel 1 isoform b	K04995	KCNJ1	K04995 KCNJ1; potassium inwardly-rectifying channel subfamily J member 1	GO:0006813//potassium ion transport;GO:0007588//excretion;GO:0034765//regulation of ion transmembrane transport;GO:1990573//potassium ion import across plasma membrane	GO:0005242//inward rectifier potassium channel activity;GO:0005524//ATP binding;GO:0005546//phosphatidylinositol-4,5-bisphosphate binding;GO:0015272//ATP-activated inward rectifier potassium channel activity	GO:0005886//plasma membrane;GO:0008076//voltage-gated potassium channel complex
ENSG00000129159	0.1	0.18	-0.853064	0.047163	down	3746	A0A1W2PPN9	KCNC1	NP_004967.1	potassium voltage-gated channel subfamily C member 1 isoform 2	K04887	KCNC1	K04887 KCNC1; potassium voltage-gated channel Shaw-related subfamily C member 1	GO:0006813//potassium ion transport;GO:0009636//response to toxic substance;GO:0009642//response to light intensity;GO:0010996//response to auditory stimulus;GO:0014075//response to amine;GO:0021549//cerebellum development;GO:0021759//globus pallidus development;GO:0035690//cellular response to drug;GO:0035864//response to potassium ion;GO:0051260//protein homooligomerization;GO:0051262//protein …	GO:0005249//voltage-gated potassium channel activity;GO:0005251//delayed rectifier potassium channel activity;GO:0019894//kinesin binding;GO:0044325//ion channel binding;GO:0099508//voltage-gated ion channel activity involved in regulation of presynaptic membrane potential	GO:0005886//plasma membrane;GO:0008076//voltage-gated potassium channel complex;GO:0009986//cell surface;GO:0016021//integral component of membrane;GO:0030424//axon;GO:0030673//axolemma;GO:0032590//dendrite membrane;GO:0032809//neuronal cell body membrane;GO:0043025//neuronal cell body;GO:0044305//calyx of Held;GO:0099055//integral component of postsynaptic membrane;GO:0099056//integral component…
ENSG00000104848	0.06	0.02	1.86414	0.00696911	up	3743	Q96RP8	KCNA7	NP_114092.2	potassium voltage-gated channel subfamily A member 7	K04880	KCNA7	K04880 KCNA7; potassium voltage-gated channel Shaker-related subfamily A member 7	GO:0034765//regulation of ion transmembrane transport;GO:0051260//protein homooligomerization;GO:0071805//potassium ion transmembrane transport	GO:0005249//voltage-gated potassium channel activity;GO:0005251//delayed rectifier potassium channel activity	GO:0005886//plasma membrane;GO:0008076//voltage-gated potassium channel complex;GO:0016021//integral component of membrane
ENSG00000162267	0	0.03	-2.77553	0.0108958	down	3699	A0A087WW43	ITIH3	XP_024309280.1	inter-alpha-trypsin inhibitor heavy chain H3 isoform X2				GO:0002576//platelet degranulation;GO:0010951//negative regulation of endopeptidase activity;GO:0030212//hyaluronan metabolic process	GO:0004866//endopeptidase inhibitor activity;GO:0004867//serine-type endopeptidase inhibitor activity	GO:0005576//extracellular region;GO:0031089//platelet dense granule lumen;GO:0070062//extracellular exosome
ENSG00000170561	0	0.02	-3.55117	0.0209812	down	153572	Q9BZI1	IRX2	XP_024310147.1	iroquois-class homeodomain protein IRX-2 isoform X2				GO:0000122//negative regulation of transcription from RNA polymerase II promoter;GO:0072086//specification of loop of Henle identity;GO:0072272//proximal/distal pattern formation involved in metanephric nephron development	GO:0000981//RNA polymerase II transcription factor activity, sequence-specific DNA binding;GO:0001227//transcriptional repressor activity, RNA polymerase II transcription regulatory region sequence-specific binding;GO:0043565//sequence-specific DNA binding	GO:0005634//nucleus
ENSG00000167378	0.05	0.1	-0.902288	0.0489433	down	126298	Q8WZA9	IRGQ	NP_001007562.1	immunity-related GTPase family Q protein				-	GO:0005525//GTP binding	-
ENSG00000188487	0	0.02	-4.09356	0.00517687	down	387755	A0A0A0MSI1	INSC	NP_001265242.1	protein inscuteable homolog isoform b				GO:0007399//nervous system development;GO:0008356//asymmetric cell division;GO:0030154//cell differentiation;GO:0031647//regulation of protein stability	GO:0005515//protein binding;GO:0019904//protein domain specific binding;GO:0030674//protein binding, bridging	GO:0005886//plasma membrane;GO:0005938//cell cortex;GO:0032991//macromolecular complex
ENSG00000153391	0.06	0.02	1.76456	0.0170169	up	125476	K7EKI6	INO80C	XP_005258253.1	INO80 complex subunit C isoform X2	K11667	INO80C	K11667 INO80C; INO80 complex subunit C	GO:0006281//DNA repair;GO:0006310//DNA recombination;GO:0006338//chromatin remodeling;GO:0008150//biological_process;GO:0016579//protein deubiquitination	GO:0003674//molecular_function	GO:0001650//fibrillar center;GO:0005654//nucleoplasm;GO:0031011//Ino80 complex;GO:0071339//MLL1 complex
ENSG00000139269	0.18	0.38	-1.07217	0.0209205	down	83729	P58166	INHBE	NP_113667.1	inhibin beta E chain preproprotein	K22689	INHBE	K22689 INHBE; inhibin beta E chain	GO:0010862//positive regulation of pathway-restricted SMAD protein phosphorylation;GO:0042981//regulation of apoptotic process;GO:0043408//regulation of MAPK cascade;GO:0048468//cell development;GO:0060395//SMAD protein signal transduction	GO:0005125//cytokine activity;GO:0005160//transforming growth factor beta receptor binding;GO:0005179//hormone activity;GO:0008083//growth factor activity	GO:0005615//extracellular space
ENSG00000145103	0.03	0	2.41383	0.0340722	up	286676	Q86SU0	ILDR1	XP_011511040.1	immunoglobulin-like domain-containing receptor 1 isoform X1				GO:0006897//endocytosis;GO:0051260//protein homooligomerization;GO:0090277//positive regulation of peptide hormone secretion;GO:1990830//cellular response to leukemia inhibitory factor	GO:0042802//identical protein binding;GO:0070506//high-density lipoprotein particle receptor activity	GO:0005829//cytosol;GO:0005886//plasma membrane;GO:0016021//integral component of membrane;GO:0032991//macromolecular complex;GO:0061689//tricellular tight junction
ENSG00000168685	0.45	0.23	0.955993	0.0215833	up	3575	H0YA41	IL7R	XP_005248356.1	interleukin-7 receptor subunit alpha isoform X1	K05072	IL7R	K05072 IL7R; interleukin 7 receptor	GO:0000018//regulation of DNA recombination;GO:0000902//cell morphogenesis;GO:0001915//negative regulation of T cell mediated cytotoxicity;GO:0002377//immunoglobulin production;GO:0006955//immune response;GO:0007165//signal transduction;GO:0007166//cell surface receptor signaling pathway;GO:0008284//positive regulation of cell proliferation;GO:0008361//regulation of cell size;GO:0010628//positive…	GO:0003823//antigen binding;GO:0004896//cytokine receptor activity;GO:0004917//interleukin-7 receptor activity;GO:0005515//protein binding	GO:0005576//extracellular region;GO:0005886//plasma membrane;GO:0009897//external side of plasma membrane;GO:0016021//integral component of membrane;GO:0030665//clathrin-coated vesicle membrane
ENSG00000113520	0.11	0	4.29226	0.00281623	up	3565	U3LVN1	IL4	NP_000580.1	interleukin-4 isoform 1 precursor	K05430	IL4	K05430 IL4; interleukin 4	GO:0006955//immune response;GO:0008203//cholesterol metabolic process;GO:0010628//positive regulation of gene expression;GO:0010633//negative regulation of epithelial cell migration;GO:0016239//positive regulation of macroautophagy;GO:0019221//cytokine-mediated signaling pathway;GO:0030183//B cell differentiation;GO:0030890//positive regulation of B cell proliferation;GO:0032736//positive regulat…	GO:0005125//cytokine activity;GO:0005136//interleukin-4 receptor binding;GO:0005515//protein binding;GO:0008083//growth factor activity	GO:0005576//extracellular region;GO:0005615//extracellular space
ENSG00000185291	2.73	4.64	-0.767521	0.0461774	down	3563	P26951	IL3RA	XP_005274838.1	interleukin-3 receptor subunit alpha isoform X2	K04737	IL3RA	K04737 IL3RA; interleukin 3 receptor alpha	GO:0000165//MAPK cascade;GO:0019221//cytokine-mediated signaling pathway;GO:0036016//cellular response to interleukin-3;GO:0038156//interleukin-3-mediated signaling pathway	GO:0004896//cytokine receptor activity;GO:0004912//interleukin-3 receptor activity;GO:0019955//cytokine binding	GO:0005886//plasma membrane;GO:0009897//external side of plasma membrane;GO:0016021//integral component of membrane;GO:0043235//receptor complex
ENSG00000137033	0.15	0.07	1.10127	0.047948	up	90865	O95760	IL33	NP_001340731.1	interleukin-33 isoform f	K12967	IL33	K12967 IL33; interleukin 33	GO:0002282//microglial cell activation involved in immune response;GO:0002686//negative regulation of leukocyte migration;GO:0002826//negative regulation of T-helper 1 type immune response;GO:0002830//positive regulation of type 2 immune response;GO:0016579//protein deubiquitination;GO:0032436//positive regulation of proteasomal ubiquitin-dependent protein catabolic process;GO:0032689//negative r…	GO:0005125//cytokine activity;GO:0005515//protein binding	GO:0005576//extracellular region;GO:0005615//extracellular space;GO:0005654//nucleoplasm;GO:0005694//chromosome;GO:0030133//transport vesicle
ENSG00000008517	3.94	1.68	1.22917	0.00188939	up	9235	C6GKH1	IL32	NP_001356522.1	interleukin-32 isoform F	K22632	IL32	K22632 IL32; interleukin 32	GO:0006952//defense response;GO:0006955//immune response;GO:0007155//cell adhesion;GO:0019221//cytokine-mediated signaling pathway	GO:0005125//cytokine activity;GO:0005515//protein binding	GO:0005615//extracellular space;GO:0005829//cytosol;GO:0016020//membrane
ENSG00000103522	0.01	0.03	-1.88826	0.0289119	down	50615	Q9HBE5	IL21R	XP_011544160.1	interleukin-21 receptor isoform X3	K05075	IL21R	K05075 IL21R; interleukin 21 receptor	GO:0030101//natural killer cell activation;GO:0038114//interleukin-21-mediated signaling pathway	GO:0001532//interleukin-21 receptor activity;GO:0004888//transmembrane signaling receptor activity;GO:0004896//cytokine receptor activity	GO:0005886//plasma membrane;GO:0016021//integral component of membrane
ENSG00000136689	0.01	0.05	-2.6158	0.0186685	down	3557	P18510	IL1RN	XP_005263718.1	interleukin-1 receptor antagonist protein isoform X1	K05481	IL1RN	K05481 IL1RN; interleukin 1 receptor antagonist	GO:0006629//lipid metabolic process;GO:0006954//inflammatory response;GO:0006955//immune response;GO:0019221//cytokine-mediated signaling pathway;GO:0030073//insulin secretion;GO:0030593//neutrophil chemotaxis;GO:0032755//positive regulation of interleukin-6 production;GO:0034115//negative regulation of heterotypic cell-cell adhesion;GO:0043123//positive regulation of I-kappaB kinase/NF-kappaB si…	GO:0005125//cytokine activity;GO:0005149//interleukin-1 receptor binding;GO:0005150//interleukin-1, Type I receptor binding;GO:0005151//interleukin-1, Type II receptor binding;GO:0005152//interleukin-1 receptor antagonist activity;GO:0005515//protein binding;GO:0045352//interleukin-1 Type I receptor antagonist activity;GO:0045353//interleukin-1 Type II receptor antagonist activity	GO:0005615//extracellular space;GO:0005737//cytoplasm;GO:0005886//plasma membrane;GO:0070062//extracellular exosome
ENSG00000169306	0.11	0.04	1.35107	0.0191734	up	11141	X5DNQ7	IL1RAPL1	XP_016884730.1	interleukin-1 receptor accessory protein-like 1 isoform X2	K05170	IL1RAPL	K05170 IL1RAPL; interleukin 1 receptor accessory protein-like	GO:0007157//heterophilic cell-cell adhesion via plasma membrane cell adhesion molecules;GO:0007165//signal transduction;GO:0010975//regulation of neuron projection development;GO:0030182//neuron differentiation;GO:0045920//negative regulation of exocytosis;GO:0050775//positive regulation of dendrite morphogenesis;GO:0051965//positive regulation of synapse assembly;GO:0070588//calcium ion transmem…	GO:0005102//receptor binding;GO:0005245//voltage-gated calcium channel activity;GO:0005515//protein binding;GO:0019966//interleukin-1 binding	GO:0005737//cytoplasm;GO:0005886//plasma membrane;GO:0009986//cell surface;GO:0016021//integral component of membrane;GO:0030424//axon;GO:0030425//dendrite;GO:0045211//postsynaptic membrane;GO:0098978//glutamatergic synapse
ENSG00000243646	0.19	0.05	1.86316	0.00236233	up	3588	A0A1B0GU52	IL10RB	NP_000619.3	interleukin-10 receptor subunit beta precursor	K05135	IL10RB	K05135 IL10RB; interleukin 10 receptor beta	GO:0006954//inflammatory response;GO:0006955//immune response;GO:0007165//signal transduction;GO:0019221//cytokine-mediated signaling pathway;GO:0046427//positive regulation of JAK-STAT cascade;GO:0051607//defense response to virus	GO:0004896//cytokine receptor activity;GO:0004920//interleukin-10 receptor activity;GO:0005515//protein binding;GO:0038023//signaling receptor activity	GO:0005886//plasma membrane;GO:0016021//integral component of membrane;GO:0032002//interleukin-28 receptor complex
ENSG00000119632	0.56	1.36	-1.26259	0.00483246	down	83982	A0A0B4J270	IFI27L2	NP_114425.1	interferon alpha-inducible protein 27-like protein 2
ENSG00000010295	0	0.03	-2.43289	0.03246	down	25900	F8W8H2	IFFO1	XP_016874658.1	intermediate filament family orphan 1 isoform X4				-	-	GO:0005882//intermediate filament
ENSG00000137331	0.1	0.03	1.86377	0.0311872	up	8870	A0A1U9X7X2	IER3	NP_003888.2	radiation-inducible immediate-early gene IEX-1
ENSG00000170509	0.51	0.24	1.06984	0.0165056	up	345275	Q7Z5P4	HSD17B13	NP_001129702.1	17-beta-hydroxysteroid dehydrogenase 13 isoform B				GO:0034389//lipid particle organization;GO:0046889//positive regulation of lipid biosynthetic process;GO:0055114//oxidation-reduction process	GO:0003674//molecular_function;GO:0016229//steroid dehydrogenase activity	GO:0005576//extracellular region;GO:0005811//lipid particle;GO:0005829//cytosol
ENSG00000153976	0.03	0.01	1.97115	0.0433255	up	9955	J3KSX5	HS3ST3A1	XP_016880969.1	heparan sulfate glucosamine 3-O-sulfotransferase 3A1 isoform X1	K07809	HS3ST3	K07809 HS3ST3; [heparan sulfate]-glucosamine 3-sulfotransferase 3 [EC:2.8.2.30]	GO:0006024//glycosaminoglycan biosynthetic process;GO:0015012//heparan sulfate proteoglycan biosynthetic process	GO:0008146//sulfotransferase activity;GO:0008467//[heparan sulfate]-glucosamine 3-sulfotransferase 1 activity;GO:0033872//[heparan sulfate]-glucosamine 3-sulfotransferase 3 activity;GO:0034483//heparan sulfate sulfotransferase activity	GO:0000139//Golgi membrane;GO:0016021//integral component of membrane
ENSG00000110169	0.07	0.26	-1.9231	0.00163364	down	3263	Q9BS19	HPX	NP_000604.1	hemopexin precursor	K18977	HPX	K18977 HPX; hemopexin	GO:0002639//positive regulation of immunoglobulin production;GO:0002925//positive regulation of humoral immune response mediated by circulating immunoglobulin;GO:0006879//cellular iron ion homeostasis;GO:0006898//receptor-mediated endocytosis;GO:0015886//heme transport;GO:0016032//viral process;GO:0020027//hemoglobin metabolic process;GO:0042168//heme metabolic process;GO:0042531//positive regula…	GO:0005515//protein binding;GO:0015232//heme transporter activity;GO:0046872//metal ion binding	GO:0005576//extracellular region;GO:0005615//extracellular space;GO:0070062//extracellular exosome;GO:0071682//endocytic vesicle lumen;GO:0072562//blood microparticle
ENSG00000121905	0.03	0.12	-1.82253	0.021282	down	3208	P84074	HPCA	XP_016856607.1	neuron-specific calcium-binding protein hippocalcin isoform X1				GO:0007420//brain development;GO:0019722//calcium-mediated signaling;GO:0031283//negative regulation of guanylate cyclase activity;GO:0031584//activation of phospholipase D activity;GO:0045762//positive regulation of adenylate cyclase activity;GO:0048839//inner ear development;GO:0060041//retina development in camera-type eye;GO:0071257//cellular response to electrical stimulus;GO:0071277//cellul…	GO:0003779//actin binding;GO:0005509//calcium ion binding;GO:0019900//kinase binding;GO:0042802//identical protein binding	GO:0005737//cytoplasm;GO:0005829//cytosol;GO:0019898//extrinsic component of membrane;GO:0030424//axon;GO:0032590//dendrite membrane;GO:0032809//neuronal cell body membrane;GO:0032839//dendrite cytoplasm;GO:0043204//perikaryon;GO:0044327//dendritic spine head;GO:0098978//glutamatergic synapse
ENSG00000198353	2.18	1.01	1.10827	0.00575598	up	3221	A0A024RB51	HOXC4	NP_705897.1	homeobox protein Hox-C4	K09304	HOX_4	K09304 HOX_4; homeobox protein HoxA/B/C/D4	GO:0001501//skeletal system development;GO:0009952//anterior/posterior pattern specification;GO:0045944//positive regulation of transcription from RNA polymerase II promoter;GO:0048704//embryonic skeletal system morphogenesis;GO:0051216//cartilage development	GO:0000977//RNA polymerase II regulatory region sequence-specific DNA binding;GO:0000980//RNA polymerase II distal enhancer sequence-specific DNA binding;GO:0000981//RNA polymerase II transcription factor activity, sequence-specific DNA binding;GO:0001228//transcriptional activator activity, RNA polymerase II transcription regulatory region sequence-specific binding;GO:0005515//protein binding;GO…	GO:0005634//nucleus
ENSG00000173917	0.14	0.03	1.84027	0.0121173	up	3212	P14652	HOXB2	XP_005257332.1	homeobox protein Hox-B2 isoform X1	K09302	HOX_2	K09302 HOX_2; homeobox protein HoxA/B2	GO:0002011//morphogenesis of an epithelial sheet;GO:0007275//multicellular organism development;GO:0008015//blood circulation;GO:0009952//anterior/posterior pattern specification;GO:0009953//dorsal/ventral pattern formation;GO:0021569//rhombomere 3 development;GO:0021570//rhombomere 4 development;GO:0021612//facial nerve structural organization;GO:0045944//positive regulation of transcription fro…	GO:0000978//RNA polymerase II core promoter proximal region sequence-specific DNA binding;GO:0000981//RNA polymerase II transcription factor activity, sequence-specific DNA binding;GO:0001228//transcriptional activator activity, RNA polymerase II transcription regulatory region sequence-specific binding;GO:0003700//transcription factor activity, sequence-specific DNA binding;GO:0043565//sequence-…	GO:0005634//nucleus;GO:0005654//nucleoplasm;GO:0005829//cytosol;GO:0016607//nuclear speck
ENSG00000135100	0.02	0.06	-1.70271	0.0223532	down	6927	E0YMJ1	HNF1A	NP_001293108.2	hepatocyte nuclear factor 1-alpha isoform 1	K08036	TCF1	K08036 TCF1; transcription factor 1, hepatocyte nuclear factor 1-alpha	GO:0001779//natural killer cell differentiation;GO:0001889//liver development;GO:0006357//regulation of transcription from RNA polymerase II promoter;GO:0030073//insulin secretion;GO:0031016//pancreas development;GO:0035565//regulation of pronephros size;GO:0035623//renal glucose absorption;GO:0042593//glucose homeostasis;GO:0045893//positive regulation of transcription, DNA-templated;GO:0045944/…	GO:0000981//RNA polymerase II transcription factor activity, sequence-specific DNA binding;GO:0001228//transcriptional activator activity, RNA polymerase II transcription regulatory region sequence-specific binding;GO:0003677//DNA binding;GO:0003700//transcription factor activity, sequence-specific DNA binding;GO:0005515//protein binding;GO:0044212//transcription regulatory region DNA binding;GO:…	GO:0005634//nucleus;GO:0005737//cytoplasm;GO:0032991//macromolecular complex
ENSG00000270276	0.53	1.1	-1.04631	0.0132471	down	554313	B2R4R0	HIST2H4B	NP_001029249.1	histone H4	K11254	H4	K11254 H4; histone H4
ENSG00000183598	0.45	0.08	2.26812	0.00603351	up	653604	Q71DI3	HIST2H3D	NP_001116847.1	histone H3.2	K11253	H3	K11253 H3; histone H3
ENSG00000277157	0.18	0.6	-1.62046	0.0312454	down	8360	B2R4R0	HIST1H4D	NP_003530.1	histone H4	K11254	H4	K11254 H4; histone H4
ENSG00000124610	0.09	0.27	-1.52787	0.0443658	down	3024	Q02539	HIST1H1A	NP_005316.1	histone H1.1	K11275	H1_5	K11275 H1_5; histone H1/5	GO:0006334//nucleosome assembly;GO:0006355//regulation of transcription, DNA-templated;GO:0007283//spermatogenesis;GO:0016584//nucleosome positioning;GO:0030261//chromosome condensation;GO:0031936//negative regulation of chromatin silencing;GO:0045910//negative regulation of DNA recombination;GO:0048260//positive regulation of receptor-mediated endocytosis	GO:0003690//double-stranded DNA binding;GO:0005515//protein binding;GO:0008201//heparin binding;GO:0031490//chromatin DNA binding;GO:0031492//nucleosomal DNA binding	GO:0000786//nucleosome;GO:0000790//nuclear chromatin;GO:0005634//nucleus;GO:0005719//nuclear euchromatin;GO:0009986//cell surface;GO:0031982//vesicle
ENSG00000143512	0.03	0	2.59705	0.0196974	up	79802	Q6UWX4	HHIPL2	XP_016857839.1	HHIP-like protein 2 isoform X3				-	GO:0003824//catalytic activity;GO:0005515//protein binding	GO:0005576//extracellular region
ENSG00000147099	0.02	0	1.97187	0.0432501	up	55869	Q9BY41	HDAC8	NP_001159892.1	histone deacetylase 8 isoform 4	K11405	HDAC8	K11405 HDAC8; histone deacetylase 8 [EC:3.5.1.98]	GO:0000122//negative regulation of transcription from RNA polymerase II promoter;GO:0006325//chromatin organization;GO:0006333//chromatin assembly or disassembly;GO:0007062//sister chromatid cohesion;GO:0031397//negative regulation of protein ubiquitination;GO:0031647//regulation of protein stability;GO:0032204//regulation of telomere maintenance;GO:0045944//positive regulation of transcription f…	GO:0004407//histone deacetylase activity;GO:0005515//protein binding;GO:0008134//transcription factor binding;GO:0030544//Hsp70 protein binding;GO:0032041//NAD-dependent histone deacetylase activity (H3-K14 specific);GO:0046872//metal ion binding;GO:0051879//Hsp90 protein binding	GO:0000118//histone deacetylase complex;GO:0000228//nuclear chromosome;GO:0005634//nucleus;GO:0005654//nucleoplasm;GO:0005737//cytoplasm;GO:0005886//plasma membrane
ENSG00000161610	0.08	0	3.53935	0.0217374	up	3060	O43612	HCRT	NP_001515.1	orexin precursor	K05246	HCRT	K05246 HCRT; hypocretin (orexin) neuropeptide	GO:0001659//temperature homeostasis;GO:0007186//G-protein coupled receptor signaling pathway;GO:0007200//phospholipase C-activating G-protein coupled receptor signaling pathway;GO:0007204//positive regulation of cytosolic calcium ion concentration;GO:0007205//protein kinase C-activating G-protein coupled receptor signaling pathway;GO:0007218//neuropeptide signaling pathway;GO:0007268//chemical sy…	GO:0005184//neuropeptide hormone activity;GO:0031771//type 1 hypocretin receptor binding;GO:0031772//type 2 hypocretin receptor binding	GO:0005576//extracellular region;GO:0005791//rough endoplasmic reticulum;GO:0008021//synaptic vesicle;GO:0030054//cell junction;GO:0030141//secretory granule;GO:0048471//perinuclear region of cytoplasm;GO:0098794//postsynapse
ENSG00000180353	0.01	0.04	-1.9912	0.041054	down	3059	F8WEZ6	HCLS1	NP_001278970.2	hematopoietic lineage cell-specific protein isoform 2	K06106	CTTN	K06106 CTTN; cortactin	GO:0000122//negative regulation of transcription from RNA polymerase II promoter;GO:0006355//regulation of transcription, DNA-templated;GO:0008284//positive regulation of cell proliferation;GO:0009725//response to hormone;GO:0014068//positive regulation of phosphatidylinositol 3-kinase signaling;GO:0030041//actin filament polymerization;GO:0030218//erythrocyte differentiation;GO:0030833//regulati…	GO:0001085//RNA polymerase II transcription factor binding;GO:0003779//actin binding;GO:0005515//protein binding;GO:0017124//SH3 domain binding;GO:0019901//protein kinase binding;GO:0044877//macromolecular complex binding;GO:0051015//actin filament binding	GO:0005634//nucleus;GO:0005667//transcription factor complex;GO:0005737//cytoplasm;GO:0005739//mitochondrion;GO:0005829//cytosol;GO:0005884//actin filament;GO:0005886//plasma membrane;GO:0030427//site of polarized growth;GO:0030864//cortical actin cytoskeleton
ENSG00000135077	1.86	3.21	-0.786635	0.0416639	down	84868	E5RFR4	HAVCR2	NP_116171.3	hepatitis A virus cellular receptor 2 precursor	K20414	HAVCR2	K20414 HAVCR2; hepatitis A virus cellular receptor 2	GO:0002250//adaptive immune response;GO:0002281//macrophage activation involved in immune response;GO:0002519//natural killer cell tolerance induction;GO:0002652//regulation of tolerance induction dependent upon immune response;GO:0002826//negative regulation of T-helper 1 type immune response;GO:0002859//negative regulation of natural killer cell mediated cytotoxicity directed against tumor cell…	GO:0005515//protein binding;GO:0046872//metal ion binding	GO:0001772//immunological synapse;GO:0005769//early endosome;GO:0009986//cell surface;GO:0016021//integral component of membrane;GO:0016592//mediator complex;GO:0030054//cell junction
ENSG00000103044	2.57	1.46	0.816742	0.0328053	up	3038	O00219	HAS3	NP_001186209.1	hyaluronan synthase 3 isoform a	K00752	hasA	K00752 hasA; hyaluronan synthase [EC:2.4.1.212]	GO:0005975//carbohydrate metabolic process;GO:0030213//hyaluronan biosynthetic process;GO:0045226//extracellular polysaccharide biosynthetic process;GO:0045893//positive regulation of transcription, DNA-templated;GO:0085029//extracellular matrix assembly;GO:1900106//positive regulation of hyaluranon cable assembly	GO:0005515//protein binding;GO:0042802//identical protein binding;GO:0050501//hyaluronan synthase activity	GO:0005737//cytoplasm;GO:0005886//plasma membrane;GO:0005887//integral component of plasma membrane;GO:0016021//integral component of membrane;GO:0036117//hyaluranon cable
ENSG00000105509	0.02	0	3.53949	0.0217328	up	3036	M0QXH4	HAS1	XP_011525186.1	hyaluronan synthase 1 isoform X1	K00752	hasA	K00752 hasA; hyaluronan synthase [EC:2.4.1.212]	GO:0006024//glycosaminoglycan biosynthetic process;GO:0007155//cell adhesion;GO:0010764//negative regulation of fibroblast migration;GO:0030213//hyaluronan biosynthetic process;GO:0036120//cellular response to platelet-derived growth factor stimulus;GO:0044849//estrous cycle;GO:0045226//extracellular polysaccharide biosynthetic process;GO:0085029//extracellular matrix assembly	GO:0005515//protein binding;GO:0042802//identical protein binding;GO:0050501//hyaluronan synthase activity	GO:0005737//cytoplasm;GO:0005886//plasma membrane;GO:0005887//integral component of plasma membrane
ENSG00000099284	0.07	0.19	-1.39646	0.0175865	down	55506	Q5SQT3	H2AFY2	NP_061119.1	core histone macro-H2A.2	K11251	H2A	K11251 H2A; histone H2A	GO:0000122//negative regulation of transcription from RNA polymerase II promoter;GO:0006325//chromatin organization;GO:0006334//nucleosome assembly;GO:0007420//brain development;GO:0007549//dosage compensation;GO:0045618//positive regulation of keratinocyte differentiation;GO:0045814//negative regulation of gene expression, epigenetic;GO:0071169//establishment of protein localization to chromatin…	GO:0000977//RNA polymerase II regulatory region sequence-specific DNA binding;GO:0003677//DNA binding;GO:0031490//chromatin DNA binding;GO:0044212//transcription regulatory region DNA binding;GO:0046982//protein heterodimerization activity	GO:0000784//nuclear chromosome, telomeric region;GO:0000786//nucleosome;GO:0000790//nuclear chromatin;GO:0001740//Barr body;GO:0005654//nucleoplasm;GO:0070062//extracellular exosome
XLOC_055019	1.03	0.41	1.30398	0.00427844	up	2953	A0A087WY67	GSTT2	NP_001289599.1	glutathione S-transferase theta-2 isoform b	K00799	GST	K00799 GST; glutathione S-transferase [EC:2.5.1.18]
ENSG00000171189	0.21	0.43	-1.03825	0.0157897	down	2897	E7EPZ0	GRIK1	NP_001307559.1	glutamate receptor ionotropic, kainate 1 isoform 6 precursor	K05201	GRIK1	K05201 GRIK1; glutamate receptor, ionotropic kainate 1	GO:0007215//glutamate receptor signaling pathway;GO:0007268//chemical synaptic transmission;GO:0007399//nervous system development;GO:0007417//central nervous system development;GO:0034220//ion transmembrane transport;GO:0035235//ionotropic glutamate receptor signaling pathway;GO:0035249//synaptic transmission, glutamatergic;GO:0050804//modulation of synaptic transmission;GO:0051966//regulation o…	GO:0008066//glutamate receptor activity;GO:0015277//kainate selective glutamate receptor activity;GO:1904315//transmitter-gated ion channel activity involved in regulation of postsynaptic membrane potential	GO:0005886//plasma membrane;GO:0005887//integral component of plasma membrane;GO:0030054//cell junction;GO:0032983//kainate selective glutamate receptor complex;GO:0042734//presynaptic membrane;GO:0045211//postsynaptic membrane
ENSG00000125675	0.01	0	3.83628	0.0107167	up	2892	A0A087WYJ6	GRIA3	NP_000819.3	glutamate receptor 3 isoform 2 precursor	K05199	GRIA3	K05199 GRIA3; glutamate receptor 3	GO:0007215//glutamate receptor signaling pathway;GO:0034220//ion transmembrane transport;GO:0035235//ionotropic glutamate receptor signaling pathway;GO:0060078//regulation of postsynaptic membrane potential;GO:2000310//regulation of N-methyl-D-aspartate selective glutamate receptor activity	GO:0001540//beta-amyloid binding;GO:0004971//AMPA glutamate receptor activity;GO:1904315//transmitter-gated ion channel activity involved in regulation of postsynaptic membrane potential	GO:0005886//plasma membrane;GO:0030054//cell junction;GO:0030666//endocytic vesicle membrane;GO:0032281//AMPA glutamate receptor complex;GO:0045211//postsynaptic membrane
ENSG00000154016	0	0.03	-4.30251	0.00267429	down	10750	J3QRP9	GRAP	NP_006604.1	GRB2-related adapter protein isoform 1				GO:0007265//Ras protein signal transduction;GO:0007267//cell-cell signaling;GO:0009967//positive regulation of signal transduction	GO:0005070//SH3/SH2 adaptor activity;GO:0005515//protein binding	GO:0005737//cytoplasm;GO:0005829//cytosol
ENSG00000123901	0.02	0	2.59667	0.0197156	up	10888	F5GZ43	GPR83	NP_001317274.1	probable G-protein coupled receptor 83 isoform 2 precursor	K04210	GPR83	K04210 GPR83; G protein-coupled receptor 83	GO:0007186//G-protein coupled receptor signaling pathway;GO:0007218//neuropeptide signaling pathway;GO:0051384//response to glucocorticoid	GO:0004930//G-protein coupled receptor activity;GO:0004983//neuropeptide Y receptor activity	GO:0005886//plasma membrane;GO:0005929//cilium;GO:0016021//integral component of membrane;GO:0097730//non-motile cilium
ENSG00000184194	0.01	0	3.53935	0.0217374	up	54328	J3KPD1	GPR173	NP_061842.1	probable G-protein coupled receptor 173	K04300	SREB3	K04300 SREB3; super conserved receptor expressed in brain 3	GO:0007165//signal transduction;GO:0007186//G-protein coupled receptor signaling pathway;GO:0097211//cellular response to gonadotropin-releasing hormone;GO:2001223//negative regulation of neuron migration	GO:0004930//G-protein coupled receptor activity;GO:0004968//gonadotropin-releasing hormone receptor activity	GO:0005886//plasma membrane;GO:0016021//integral component of membrane
ENSG00000178115	0	0.02	-3.54804	0.0210811	down	728047	H3BV12	GOLGA8O	XP_011520291.1	golgin subfamily A member 8O isoform X3				-	-	GO:0005794//Golgi apparatus
ENSG00000125787	0	0.11	-4.3045	0.00266151	down	2797	O43555	GNRH2	NP_847902.1	progonadoliberin-2 isoform b preproprotein	K05252	GNRH	K05252 GNRH; gonadotropin-releasing hormone	GO:0000003//reproduction;GO:0007165//signal transduction;GO:0007186//G-protein coupled receptor signaling pathway;GO:0007275//multicellular organism development	GO:0005179//hormone activity;GO:0005183//gonadotropin hormone-releasing hormone activity;GO:0031530//gonadotropin-releasing hormone receptor binding	GO:0005576//extracellular region;GO:0005615//extracellular space
ENSG00000204590	0.01	0	3.83633	0.0107156	up	2794	A2AB27	GNL1	XP_005249072.1	guanine nucleotide-binding protein-like 1 isoform X1
ENSG00000060558	0.01	0.05	-1.99235	0.0409385	down	2769	K7EP74	GNA15	NP_002059.3	guanine nucleotide-binding protein subunit alpha-15	K04637	GNA15	K04637 GNA15; guanine nucleotide-binding protein subunit alpha-15	GO:0007186//G-protein coupled receptor signaling pathway;GO:0007188//adenylate cyclase-modulating G-protein coupled receptor signaling pathway;GO:0007202//activation of phospholipase C activity;GO:0007207//phospholipase C-activating G-protein coupled acetylcholine receptor signaling pathway;GO:0030168//platelet activation;GO:0051482//positive regulation of cytosolic calcium ion concentration invo…	GO:0001664//G-protein coupled receptor binding;GO:0003924//GTPase activity;GO:0005525//GTP binding;GO:0031683//G-protein beta/gamma-subunit complex binding;GO:0046872//metal ion binding	GO:0005834//heterotrimeric G-protein complex;GO:0005886//plasma membrane
ENSG00000164411	0.19	0.43	-1.19972	0.00973053	down	375519	A0A0A0MRM5	GJB7	NP_940970.1	gap junction beta-7 protein	K07626	GJB7	K07626 GJB7; gap junction beta-7 protein	GO:0007154//cell communication;GO:0055085//transmembrane transport	GO:0005243//gap junction channel activity	GO:0005922//connexin complex;GO:0016021//integral component of membrane
XLOC_054905	0.6	1.32	-1.12347	0.0050839	down	79893	A0A087X1N0	GGNBP2	XP_011523567.1	gametogenetin-binding protein 2 isoform X2
ENSG00000261949	0.06	0.01	1.97154	0.0432846	up	100507003	I3L273	GFY	NP_001182185.1	Golgi-associated olfactory signaling regulator precursor				GO:0007608//sensory perception of smell;GO:0050896//response to stimulus;GO:0097499//protein localization to non-motile cilium;GO:1905515//non-motile cilium assembly	-	GO:0030173//integral component of Golgi membrane
ENSG00000125965	0.14	0.06	1.15896	0.0435114	up	8200	F1T0J1	GDF5	NP_001306067.1	growth/differentiation factor 5 preproprotein	K04664	GDF5	K04664 GDF5; growth differentiation factor 5	GO:0007179//transforming growth factor beta receptor signaling pathway;GO:0007267//cell-cell signaling;GO:0009612//response to mechanical stimulus;GO:0010862//positive regulation of pathway-restricted SMAD protein phosphorylation;GO:0030326//embryonic limb morphogenesis;GO:0030509//BMP signaling pathway;GO:0030513//positive regulation of BMP signaling pathway;GO:0032331//negative regulation of ch…	GO:0005125//cytokine activity;GO:0005160//transforming growth factor beta receptor binding;GO:0005515//protein binding;GO:0008083//growth factor activity;GO:0036122//BMP binding;GO:0042802//identical protein binding	GO:0005576//extracellular region;GO:0005615//extracellular space;GO:0005886//plasma membrane
ENSG00000106633	0.07	0.02	1.97978	0.0108073	up	2645	P35557	GCK	NP_000153.1	hexokinase-4 isoform 1	K12407	GCK	K12407 GCK; glucokinase [EC:2.7.1.2]	GO:0001678//cellular glucose homeostasis;GO:0006096//glycolytic process;GO:0006110//regulation of glycolytic process;GO:0006739//NADP metabolic process;GO:0032024//positive regulation of insulin secretion;GO:0032869//cellular response to insulin stimulus;GO:0042593//glucose homeostasis;GO:0043266//regulation of potassium ion transport;GO:0044320//cellular response to leptin stimulus;GO:0045721//n…	GO:0004340//glucokinase activity;GO:0005515//protein binding;GO:0005524//ATP binding;GO:0005536//glucose binding;GO:0008865//fructokinase activity;GO:0019158//mannokinase activity	GO:0005654//nucleoplasm;GO:0005739//mitochondrion;GO:0005829//cytosol
ENSG00000102145	0.18	0.03	2.40787	0.00119283	up	2623	B7WNQ9	GATA1	XP_011542200.1	erythroid transcription factor isoform X2	K09182	GATA1	K09182 GATA1; GATA-binding protein 1	GO:0000122//negative regulation of transcription from RNA polymerase II promoter;GO:0001701//in utero embryonic development;GO:0006366//transcription from RNA polymerase II promoter;GO:0007267//cell-cell signaling;GO:0007596//blood coagulation;GO:0008285//negative regulation of cell proliferation;GO:0008584//male gonad development;GO:0010559//regulation of glycoprotein biosynthetic process;GO:001…	GO:0000976//transcription regulatory region sequence-specific DNA binding;GO:0000977//RNA polymerase II regulatory region sequence-specific DNA binding;GO:0000978//RNA polymerase II core promoter proximal region sequence-specific DNA binding;GO:0000980//RNA polymerase II distal enhancer sequence-specific DNA binding;GO:0000981//RNA polymerase II transcription factor activity, sequence-specific DN…	GO:0005634//nucleus;GO:0005654//nucleoplasm;GO:0005667//transcription factor complex;GO:0017053//transcriptional repressor complex;GO:0032993//protein-DNA complex
ENSG00000148935	0	0.03	-4.0918	0.00519623	down	2620	O43903	GAS2	NP_808221.1	growth arrest-specific protein 2 isoform a				GO:0001544//initiation of primordial ovarian follicle growth;GO:0001547//antral ovarian follicle growth;GO:0006915//apoptotic process;GO:0007050//cell cycle arrest;GO:0008360//regulation of cell shape;GO:0008593//regulation of Notch signaling pathway;GO:0030728//ovulation;GO:0071711//basement membrane organization	GO:0008017//microtubule binding	GO:0005829//cytosol;GO:0005884//actin filament;GO:0016020//membrane
ENSG00000158089	0	0.02	-3.84778	0.0102784	down	79623	H7C168	GALNT14	NP_001316026.1	polypeptide N-acetylgalactosaminyltransferase 14 isoform 6	K00710	GALNT	K00710 GALNT; polypeptide N-acetylgalactosaminyltransferase [EC:2.4.1.41]	GO:0016266//O-glycan processing	GO:0004653//polypeptide N-acetylgalactosaminyltransferase activity;GO:0030246//carbohydrate binding;GO:0046872//metal ion binding	GO:0000139//Golgi membrane;GO:0005794//Golgi apparatus;GO:0016021//integral component of membrane
ENSG00000197093	0.05	0.14	-1.38755	0.0140205	down	79690	A0A0J9YYD8	GAL3ST4	NP_078913.3	galactose-3-O-sulfotransferase 4	K09677	GAL3ST4	K09677 GAL3ST4; galactose-3-O-sulfotransferase 4 [EC:2.8.2.-]	GO:0006790//sulfur compound metabolic process;GO:0007267//cell-cell signaling;GO:0009100//glycoprotein metabolic process;GO:0009247//glycolipid biosynthetic process;GO:0009311//oligosaccharide metabolic process;GO:0030166//proteoglycan biosynthetic process	GO:0001733//galactosylceramide sulfotransferase activity;GO:0050656//3'-phosphoadenosine 5'-phosphosulfate binding;GO:0050694//galactose 3-O-sulfotransferase activity;GO:0050698//proteoglycan sulfotransferase activity	GO:0016020//membrane;GO:0016021//integral component of membrane;GO:0032580//Golgi cisterna membrane;GO:0070062//extracellular exosome
ENSG00000128242	1.21	0.53	1.18556	0.00447446	up	9514	A0A024R1D7	GAL3ST1	NP_001305033.1	galactosylceramide sulfotransferase isoform 1	K01019	GAL3ST1	K01019 GAL3ST1; galactosylceramide sulfotransferase [EC:2.8.2.11]	GO:0006487//protein N-linked glycosylation;GO:0006682//galactosylceramide biosynthetic process;GO:0007283//spermatogenesis;GO:0042552//myelination	GO:0001733//galactosylceramide sulfotransferase activity;GO:0008146//sulfotransferase activity	GO:0000139//Golgi membrane;GO:0005887//integral component of plasma membrane;GO:0016020//membrane
ENSG00000186628	0.02	0.01	1.74411	0.0468603	up	123722	H0YLA8	FSD2	XP_016877413.1	fibronectin type III and SPRY domain-containing protein 2 isoform X3				-	GO:0005515//protein binding	GO:0005634//nucleus;GO:0016529//sarcoplasmic reticulum;GO:0048471//perinuclear region of cytoplasm
ENSG00000186765	2.9	1.67	0.793656	0.0427648	up	25794	O14926	FSCN2	XP_011522889.1	fascin-2 isoform X1	K17455	FSCN2	K17455 FSCN2; fascin2	GO:0007163//establishment or maintenance of cell polarity;GO:0007601//visual perception;GO:0009653//anatomical structure morphogenesis;GO:0016477//cell migration;GO:0030036//actin cytoskeleton organization;GO:0042462//eye photoreceptor cell development;GO:0051017//actin filament bundle assembly	GO:0003779//actin binding;GO:0030674//protein binding, bridging;GO:0051015//actin filament binding	GO:0005737//cytoplasm;GO:0015629//actin cytoskeleton;GO:0032420//stereocilium
ENSG00000073910	0.12	0.22	-0.807911	0.0448558	down	10129	A0A0C4DFX2	FRY	XP_016875796.1	protein furry homolog isoform X4				GO:0000902//cell morphogenesis;GO:0031175//neuron projection development;GO:0043086//negative regulation of catalytic activity;GO:1904428//negative regulation of tubulin deacetylation	GO:0004857//enzyme inhibitor activity	GO:0000922//spindle pole;GO:0005815//microtubule organizing center;GO:0005938//cell cortex
ENSG00000153303	0	0.02	-2.43081	0.0326067	down	79981	D6RB43	FRMD1	XP_011534444.1	FERM domain-containing protein 1 isoform X6	K16821	FRMD1	K16821 FRMD1; FERM domain-containing protein 1	-	-	GO:0005856//cytoskeleton
XLOC_055035	1.17	0.56	1.05915	0.0176661	up	2483	J3KSQ7	FRG1	XP_016863447.1	protein FRG1 isoform X1	K13122	FRG1	K13122 FRG1; protein FRG1
ENSG00000171051	0.01	0.1	-3.58411	0.000292932	down	2357	M0QZT0	FPR1	NP_002020.1	fMet-Leu-Phe receptor	K04172	FPR1	K04172 FPR1; formyl peptide receptor 1	GO:0000187//activation of MAPK activity;GO:0002430//complement receptor mediated signaling pathway;GO:0006935//chemotaxis;GO:0006954//inflammatory response;GO:0007165//signal transduction;GO:0007186//G-protein coupled receptor signaling pathway;GO:0007188//adenylate cyclase-modulating G-protein coupled receptor signaling pathway;GO:0007200//phospholipase C-activating G-protein coupled receptor si…	GO:0001664//G-protein coupled receptor binding;GO:0004930//G-protein coupled receptor activity;GO:0004982//N-formyl peptide receptor activity;GO:0005124//scavenger receptor binding;GO:0005515//protein binding;GO:0050786//RAGE receptor binding	GO:0005737//cytoplasm;GO:0005886//plasma membrane;GO:0016021//integral component of membrane;GO:0030667//secretory granule membrane;GO:0035577//azurophil granule membrane;GO:0101003//ficolin-1-rich granule membrane
ENSG00000206262	0.07	0.17	-1.20447	0.0149679	down	401089	Q6ZUU3	FOXL2NB	XP_024309285.1	FOXL2 neighbor protein isoform X1				-	-	GO:0001650//fibrillar center
ENSG00000125798	0.03	0	4.08219	0.00543184	up	3170	Q9Y261	FOXA2	NP_068556.2	hepatocyte nuclear factor 3-beta isoform 1	K08035	FOXA2	K08035 FOXA2; forkhead box protein A2, hepatocyte nuclear factor 3-beta	GO:0000432//positive regulation of transcription from RNA polymerase II promoter by glucose;GO:0001708//cell fate specification;GO:0006325//chromatin organization;GO:0006357//regulation of transcription from RNA polymerase II promoter;GO:0008344//adult locomotory behavior;GO:0009653//anatomical structure morphogenesis;GO:0010719//negative regulation of epithelial to mesenchymal transition;GO:0030…	GO:0000978//RNA polymerase II core promoter proximal region sequence-specific DNA binding;GO:0000981//RNA polymerase II transcription factor activity, sequence-specific DNA binding;GO:0003677//DNA binding;GO:0003700//transcription factor activity, sequence-specific DNA binding;GO:0008134//transcription factor binding;GO:0019904//protein domain specific binding;GO:0044212//transcription regulatory…	GO:0005634//nucleus;GO:0005654//nucleoplasm;GO:0005737//cytoplasm;GO:0030054//cell junction
ENSG00000133393	1.38	2.38	-0.790542	0.0426222	down	123811	I3L0U4	FOPNL	NP_001291427.1	lisH domain-containing protein FOPNL isoform 3	K16535	FOPNL	K16535 FOPNL; lisH domain-containing protein FOPNL
ENSG00000110203	0.1	0	4.63862	0.000800462	up	2352	P41439	FOLR3	NP_001304974.1	folate receptor gamma isoform 2	K13649	FOLR	K13649 FOLR; folate receptor	GO:0007155//cell adhesion;GO:0007342//fusion of sperm to egg plasma membrane;GO:0015884//folic acid transport;GO:0035036//sperm-egg recognition;GO:0043312//neutrophil degranulation	GO:0005542//folic acid binding;GO:0038023//signaling receptor activity	GO:0005576//extracellular region;GO:0016020//membrane;GO:0019898//extrinsic component of membrane;GO:0031362//anchored component of external side of plasma membrane;GO:0035580//specific granule lumen;GO:1904724//tertiary granule lumen
ENSG00000134612	0	0.03	-3.84645	0.0103034	down	219595		FOLH1B	NP_710163.1	putative N-acetylated-alpha-linked acidic dipeptidase
ENSG00000052795	0.39	0.68	-0.785195	0.0450783	down	57600	H0Y8F3	FNIP2	NP_001332972.1	folliculin-interacting protein 2 isoform 3	K20401	FNIP2	K20401 FNIP2; folliculin-interacting protein 2	GO:0000122//negative regulation of transcription from RNA polymerase II promoter;GO:0001932//regulation of protein phosphorylation;GO:0006468//protein phosphorylation;GO:0008630//intrinsic apoptotic signaling pathway in response to DNA damage;GO:0010823//negative regulation of mitochondrion organization;GO:0031334//positive regulation of protein complex assembly;GO:0033138//positive regulation of…	GO:0005515//protein binding;GO:0042030//ATPase inhibitor activity;GO:0051087//chaperone binding	GO:0005737//cytoplasm
ENSG00000000938	0.02	0	3.53943	0.0217349	up	2268	P09769	FGR	XP_011539315.1	tyrosine-protein kinase Fgr isoform X4	K08891	FGR	K08891 FGR; tyrosine-protein kinase Fgr [EC:2.7.10.2]	GO:0002768//immune response-regulating cell surface receptor signaling pathway;GO:0006468//protein phosphorylation;GO:0007169//transmembrane receptor protein tyrosine kinase signaling pathway;GO:0007229//integrin-mediated signaling pathway;GO:0008360//regulation of cell shape;GO:0009615//response to virus;GO:0014068//positive regulation of phosphatidylinositol 3-kinase signaling;GO:0018108//pepti…	GO:0001784//phosphotyrosine binding;GO:0004713//protein tyrosine kinase activity;GO:0004715//non-membrane spanning protein tyrosine kinase activity;GO:0005102//receptor binding;GO:0005515//protein binding;GO:0005524//ATP binding;GO:0019901//protein kinase binding;GO:0034987//immunoglobulin receptor binding;GO:0034988//Fc-gamma receptor I complex binding	GO:0005576//extracellular region;GO:0005743//mitochondrial inner membrane;GO:0005758//mitochondrial intermembrane space;GO:0005829//cytosol;GO:0005856//cytoskeleton;GO:0005886//plasma membrane;GO:0015629//actin cytoskeleton;GO:0016235//aggresome;GO:0031234//extrinsic component of cytoplasmic side of plasma membrane;GO:0032587//ruffle membrane;GO:0034774//secretory granule lumen;GO:0070062//extrac…
ENSG00000158815	0.01	0.04	-1.99114	0.0410609	down	8822	O60258	FGF17	XP_005273732.1	fibroblast growth factor 17 isoform X1	K04358	FGF	K04358 FGF; fibroblast growth factor	GO:0000165//MAPK cascade;GO:0007165//signal transduction;GO:0007267//cell-cell signaling;GO:0007399//nervous system development;GO:0008284//positive regulation of cell proliferation;GO:0008543//fibroblast growth factor receptor signaling pathway;GO:0051897//positive regulation of protein kinase B signaling	GO:0005105//type 1 fibroblast growth factor receptor binding;GO:0005111//type 2 fibroblast growth factor receptor binding;GO:0008083//growth factor activity	GO:0005576//extracellular region;GO:0005615//extracellular space
ENSG00000146192	0.03	0	3.16061	0.00236998	up	221472	H7BY95	FGD2	XP_016865918.1	FYVE, RhoGEF and PH domain-containing protein 2 isoform X1	K05721	FGD2	K05721 FGD2; FYVE, RhoGEF and PH domain containing 2	GO:0007010//cytoskeleton organization;GO:0007186//G-protein coupled receptor signaling pathway;GO:0008360//regulation of cell shape;GO:0030036//actin cytoskeleton organization;GO:0035023//regulation of Rho protein signal transduction;GO:0043065//positive regulation of apoptotic process;GO:0043087//regulation of GTPase activity;GO:0043507//positive regulation of JUN kinase activity;GO:0046847//fil…	GO:0005085//guanyl-nucleotide exchange factor activity;GO:0005089//Rho guanyl-nucleotide exchange factor activity;GO:0005515//protein binding;GO:0031267//small GTPase binding;GO:0046872//metal ion binding;GO:1901981//phosphatidylinositol phosphate binding	GO:0001726//ruffle;GO:0005634//nucleus;GO:0005737//cytoplasm;GO:0005794//Golgi apparatus;GO:0005829//cytosol;GO:0005856//cytoskeleton;GO:0030027//lamellipodium;GO:0031901//early endosome membrane;GO:0032587//ruffle membrane
ENSG00000182511	0.19	0.44	-1.24245	0.00588369	down	2242	P07332	FES	XP_016877497.1	tyrosine-protein kinase Fes/Fps isoform X4	K07527	FES	K07527 FES; tyrosine-protein kinase Fes/Fps [EC:2.7.10.2]	GO:0001578//microtubule bundle formation;GO:0006935//chemotaxis;GO:0007098//centrosome cycle;GO:0007155//cell adhesion;GO:0008360//regulation of cell shape;GO:0010976//positive regulation of neuron projection development;GO:0018108//peptidyl-tyrosine phosphorylation;GO:0030155//regulation of cell adhesion;GO:0031116//positive regulation of microtubule polymerization;GO:0042127//regulation of cell…	GO:0004713//protein tyrosine kinase activity;GO:0004715//non-membrane spanning protein tyrosine kinase activity;GO:0005515//protein binding;GO:0005524//ATP binding;GO:0008017//microtubule binding;GO:0034987//immunoglobulin receptor binding;GO:0035091//phosphatidylinositol binding	GO:0005737//cytoplasm;GO:0005794//Golgi apparatus;GO:0005829//cytosol;GO:0005925//focal adhesion;GO:0015630//microtubule cytoskeleton;GO:0031234//extrinsic component of cytoplasmic side of plasma membrane;GO:0031410//cytoplasmic vesicle
ENSG00000142748	0.11	0.02	2.11715	0.0271616	up	8547	Q6UXM4	FCN3	NP_775628.1	ficolin-3 isoform 2 precursor	K10104	FCN	K10104 FCN; ficolin	GO:0001867//complement activation, lectin pathway;GO:0006956//complement activation;GO:0043654//recognition of apoptotic cell;GO:0046597//negative regulation of viral entry into host cell;GO:0051607//defense response to virus;GO:1902679//negative regulation of RNA biosynthetic process	GO:0003823//antigen binding;GO:0005515//protein binding;GO:0030246//carbohydrate binding;GO:0046872//metal ion binding	GO:0005576//extracellular region;GO:0005581//collagen trimer;GO:0072562//blood microparticle
ENSG00000164049	0.03	0.1	-1.53885	0.0314062	down	285231	Q6X9E4	FBXW12	NP_996985.2	F-box/WD repeat-containing protein 12 isoform 1	K10267	FBXW12S	K10267 FBXW12S; F-box and WD-40 domain protein 12/13/14/15/16/17/19	GO:0000209//protein polyubiquitination;GO:0043687//post-translational protein modification	-	GO:0005829//cytosol
ENSG00000205085	0.39	0.68	-0.818941	0.0386161	down	346653	Q6NXP2	FAM71F2	XP_024302520.1	protein FAM71F2 isoform X4
ENSG00000135248	0.06	0.17	-1.35532	0.0292468	down	84691	Q96KD3	FAM71F1	NP_115988.1	protein FAM71F1 isoform 1
ENSG00000189090	0.03	0.25	-2.61623	0.0186492	down	100133093	B3EWG6	FAM25G	NP_001131021.1	protein FAM25G
ENSG00000088926	0.02	0	3.53914	0.0217445	up	2160	P03951	F11	XP_005262878.1	coagulation factor XI isoform X1	K01323	F11	K01323 F11; coagulation factor XI [EC:3.4.21.27]	GO:0007596//blood coagulation;GO:0007597//blood coagulation, intrinsic pathway;GO:0031639//plasminogen activation;GO:0051919//positive regulation of fibrinolysis	GO:0004252//serine-type endopeptidase activity;GO:0005515//protein binding;GO:0008201//heparin binding;GO:0070009//serine-type aminopeptidase activity	GO:0005576//extracellular region;GO:0005615//extracellular space;GO:0005886//plasma membrane;GO:0016020//membrane;GO:0070062//extracellular exosome
ENSG00000196482	0.01	0	3.83564	0.010729	up	2104	F1D8R6	ESRRG	NP_001230436.1	estrogen-related receptor gamma isoform 5	K08554	NR3B3	K08554 NR3B3; estrogen-related receptor gamma	GO:0006355//regulation of transcription, DNA-templated;GO:0006367//transcription initiation from RNA polymerase II promoter;GO:0043401//steroid hormone mediated signaling pathway;GO:0045893//positive regulation of transcription, DNA-templated;GO:0045944//positive regulation of transcription from RNA polymerase II promoter;GO:0048384//retinoic acid receptor signaling pathway	GO:0000977//RNA polymerase II regulatory region sequence-specific DNA binding;GO:0000981//RNA polymerase II transcription factor activity, sequence-specific DNA binding;GO:0001228//transcriptional activator activity, RNA polymerase II transcription regulatory region sequence-specific binding;GO:0003707//steroid hormone receptor activity;GO:0004879//RNA polymerase II transcription factor activity,…	GO:0005654//nucleoplasm
ENSG00000268964	0.02	0.1	-2.05828	0.00244104	down	100271846	M9QSX5	ERVV-2	NP_001177984.1	endogenous retrovirus group V member 2 Env polyprotein precursor				-	-	GO:0016021//integral component of membrane
XLOC_054775	0.04	0.43	-3.40939	5.59032e-07	down	23085	Q8IUD2	ERC1	XP_016874563.1	ELKS/Rab6-interacting/CAST family member 1 isoform X17	K16072	ERC1	K16072 ERC1; ELKS/RAB6-interacting/CAST family member 1
ENSG00000133106	0.01	0	3.53943	0.0217349	up	94240	F5H4H1	EPSTI1	XP_006719959.1	epithelial-stromal interaction protein 1 isoform X2
ENSG00000188833	0.94	0.48	0.97354	0.0169763	up	377841	Q5MY95	ENTPD8	XP_011516967.1	ectonucleoside triphosphate diphosphohydrolase 8 isoform X1	K01510	ENTPD1_3_8	K01510 ENTPD1_3_8; apyrase [EC:3.6.1.5]	GO:0009124//nucleoside monophosphate biosynthetic process;GO:0009133//nucleoside diphosphate biosynthetic process;GO:0034656//nucleobase-containing small molecule catabolic process	GO:0005524//ATP binding;GO:0017110//nucleoside-diphosphatase activity;GO:0017111//nucleoside-triphosphatase activity;GO:0046872//metal ion binding	GO:0005886//plasma membrane;GO:0016021//integral component of membrane
ENSG00000197561	0.36	0.07	2.33334	0.000423925	up	1991	P08246	ELANE	NP_001963.1	neutrophil elastase preproprotein	K01327	ELANE	K01327 ELANE; leukocyte elastase [EC:3.4.21.37]
ENSG00000063046	0.19	0.08	1.27835	0.00847783	up	1975	F8VYE9	EIF4B	NP_001408.2	eukaryotic translation initiation factor 4B isoform 2	K03258	EIF4B	K03258 EIF4B; translation initiation factor 4B	GO:0001731//formation of translation preinitiation complex;GO:0002181//cytoplasmic translation;GO:0006413//translational initiation;GO:0006446//regulation of translational initiation;GO:0097010//eukaryotic translation initiation factor 4F complex assembly	GO:0003723//RNA binding;GO:0003743//translation initiation factor activity;GO:0005515//protein binding;GO:0033592//RNA strand annealing activity;GO:0034057//RNA strand-exchange activity;GO:0043024//ribosomal small subunit binding	GO:0005829//cytosol;GO:0005844//polysome;GO:0016281//eukaryotic translation initiation factor 4F complex
ENSG00000120738	62.49	32.27	0.953515	0.0112779	up	1958	Q546S1	EGR1	NP_001955.1	early growth response protein 1	K09203	EGR1	K09203 EGR1; early growth response protein 1	GO:0000122//negative regulation of transcription from RNA polymerase II promoter;GO:0001666//response to hypoxia;GO:0002931//response to ischemia;GO:0006357//regulation of transcription from RNA polymerase II promoter;GO:0006366//transcription from RNA polymerase II promoter;GO:0009749//response to glucose;GO:0010628//positive regulation of gene expression;GO:0030217//T cell differentiation;GO:00…	GO:0000976//transcription regulatory region sequence-specific DNA binding;GO:0000977//RNA polymerase II regulatory region sequence-specific DNA binding;GO:0000981//RNA polymerase II transcription factor activity, sequence-specific DNA binding;GO:0001228//transcriptional activator activity, RNA polymerase II transcription regulatory region sequence-specific binding;GO:0003677//DNA binding;GO:00037…	GO:0005634//nucleus;GO:0005654//nucleoplasm;GO:0005737//cytoplasm
ENSG00000172638	1.45	0.61	1.24481	0.00220666	up	30008	E9PNB8	EFEMP2	NP_058634.4	EGF-containing fibulin-like extracellular matrix protein 2 precursor	K19866	EFEMP2	K19866 EFEMP2; EGF-containing fibulin-like extracellular matrix protein 2	GO:0048251//elastic fiber assembly	GO:0005201//extracellular matrix structural constituent;GO:0005509//calcium ion binding;GO:0005515//protein binding	GO:0005576//extracellular region;GO:0005604//basement membrane;GO:0070062//extracellular exosome;GO:1903561//extracellular vesicle
ENSG00000127129	1.68	0.94	0.830738	0.0444265	up	1907	P20800	EDN2	XP_016856001.1	endothelin-2 isoform X1	K16367	EDN2	K16367 EDN2; endothelin-2	GO:0001516//prostaglandin biosynthetic process;GO:0001659//temperature homeostasis;GO:0002690//positive regulation of leukocyte chemotaxis;GO:0003058//hormonal regulation of the force of heart contraction;GO:0003099//positive regulation of the force of heart contraction by chemical signal;GO:0003100//regulation of systemic arterial blood pressure by endothelin;GO:0007166//cell surface receptor si…	GO:0005179//hormone activity;GO:0031708//endothelin B receptor binding	GO:0005576//extracellular region;GO:0005615//extracellular space;GO:0005623//cell
ENSG00000105246	1.08	0.5	1.09209	0.0140414	up	10148	Q14213	EBI3	XP_011525921.1	interleukin-27 subunit beta isoform X1				GO:0006959//humoral immune response;GO:0042088//T-helper 1 type immune response;GO:0042098//T cell proliferation;GO:0045078//positive regulation of interferon-gamma biosynthetic process;GO:0046641//positive regulation of alpha-beta T cell proliferation;GO:0070106//interleukin-27-mediated signaling pathway;GO:0070120//ciliary neurotrophic factor-mediated signaling pathway;GO:0070757//interleukin-3…	GO:0004896//cytokine receptor activity;GO:0004897//ciliary neurotrophic factor receptor activity;GO:0005125//cytokine activity;GO:0005515//protein binding;GO:0019955//cytokine binding;GO:0045523//interleukin-27 receptor binding	GO:0005576//extracellular region;GO:0005615//extracellular space;GO:0005788//endoplasmic reticulum lumen;GO:0005886//plasma membrane;GO:0009897//external side of plasma membrane;GO:0043235//receptor complex;GO:0070110//ciliary neurotrophic factor receptor complex;GO:0097059//CNTFR-CLCF1 complex
ENSG00000105204	1.34	0.75	0.827972	0.0372867	up	9149	A0A024R0M8	DYRK1B	NP_006475.1	dual specificity tyrosine-phosphorylation-regulated kinase 1B isoform p66	K08825	DYRK1	K08825 DYRK1; dual specificity tyrosine-phosphorylation-regulated kinase 1 [EC:2.7.12.1]
ENSG00000276023	0.08	0	5.35322	2.59784e-05	up	11072	Q6FI36	DUSP14	XP_005257034.1	dual specificity protein phosphatase 14 isoform X1	K14165	K14165	K14165 K14165; atypical dual specificity phosphatase [EC:3.1.3.16 3.1.3.48]
ENSG00000105865	0.19	1.06	-2.48716	3.92112e-08	down	11062	F8WFE3	DUS4L	XP_016867200.1	tRNA-dihydrouridine(20a/20b) synthase	K05545	DUS4	K05545 DUS4; tRNA-dihydrouridine synthase 4 [EC:1.3.1.90]
XLOC_055348	0.26	0.61	-1.16959	0.00923228	down	113878	H7C3B8	DTX2	XP_011514076.1	probable E3 ubiquitin-protein ligase DTX2 isoform X1	K06058	DTX	K06058 DTX; deltex [EC:2.3.2.27]	GO:0007219//Notch signaling pathway;GO:0016567//protein ubiquitination
ENSG00000136982	0.34	0.63	-0.877647	0.0424683	down	79075	Q9BVC3	DSCC1	XP_005251122.1	sister chromatid cohesion protein DCC1 isoform X1	K11271	DSCC1	K11271 DSCC1; sister chromatid cohesion protein DCC1	GO:0006260//DNA replication;GO:0006275//regulation of DNA replication;GO:0032508//DNA duplex unwinding;GO:0034088//maintenance of mitotic sister chromatid cohesion;GO:0034421//post-translational protein acetylation;GO:1900264//positive regulation of DNA-directed DNA polymerase activity	GO:0003689//DNA clamp loader activity;GO:0005515//protein binding;GO:0017116//single-stranded DNA-dependent ATP-dependent DNA helicase activity	GO:0000775//chromosome, centromeric region;GO:0000785//chromatin;GO:0005654//nucleoplasm;GO:0031390//Ctf18 RFC-like complex
ENSG00000069696	0	0.04	-3.54931	0.0210404	down	1815	P21917	DRD4	NP_000788.2	D(4) dopamine receptor	K04147	DRD4	K04147 DRD4; dopamine receptor D4	GO:0000187//activation of MAPK activity;GO:0001662//behavioral fear response;GO:0001975//response to amphetamine;GO:0006874//cellular calcium ion homeostasis;GO:0007186//G-protein coupled receptor signaling pathway;GO:0007187//G-protein coupled receptor signaling pathway, coupled to cyclic nucleotide second messenger;GO:0007195//adenylate cyclase-inhibiting dopamine receptor signaling pathway;GO:…	GO:0001591//dopamine neurotransmitter receptor activity, coupled via Gi/Go;GO:0004930//G-protein coupled receptor activity;GO:0004952//dopamine neurotransmitter receptor activity;GO:0004993//G-protein coupled serotonin receptor activity;GO:0005515//protein binding;GO:0008144//drug binding;GO:0015459//potassium channel regulator activity;GO:0017124//SH3 domain binding;GO:0030594//neurotransmitter …	GO:0005886//plasma membrane;GO:0005887//integral component of plasma membrane;GO:0016020//membrane;GO:0030425//dendrite;GO:0098794//postsynapse;GO:0098978//glutamatergic synapse
ENSG00000146094	0.31	0.63	-1.03907	0.0166982	down	79930	D6RF29	DOK3	XP_016865372.1	docking protein 3 isoform X2				GO:0007265//Ras protein signal transduction;GO:0043312//neutrophil degranulation	GO:0005515//protein binding	GO:0005886//plasma membrane;GO:0030667//secretory granule membrane;GO:0101003//ficolin-1-rich granule membrane
ENSG00000163687	0	0.02	-3.54882	0.0210559	down	1776	C9J0L2	DNASE1L3	NP_004935.1	deoxyribonuclease gamma isoform 1 precursor	K11995	DNASE1L	K11995 DNASE1L; deoxyribonuclease-1-like protein [EC:3.1.21.-]	GO:0000737//DNA catabolic process, endonucleolytic;GO:0002283//neutrophil activation involved in immune response;GO:0002673//regulation of acute inflammatory response;GO:0006259//DNA metabolic process;GO:0006308//DNA catabolic process;GO:0006309//apoptotic DNA fragmentation;GO:0010623//programmed cell death involved in cell development;GO:0070948//regulation of neutrophil mediated cytotoxicity	GO:0003677//DNA binding;GO:0004530//deoxyribonuclease I activity;GO:0004536//deoxyribonuclease activity;GO:0005509//calcium ion binding	GO:0005576//extracellular region;GO:0005634//nucleus;GO:0005783//endoplasmic reticulum
ENSG00000256061	0.01	0.09	-3.5841	0.000292956	down	161582	Q8WXU2	DNAAF4	NP_001028731.1	dynein assembly factor 4, axonemal isoform b	K19758	DYX1C1	K19758 DYX1C1; dyslexia susceptibility 1 candidate gene 1 protein	GO:0001764//neuron migration;GO:0003341//cilium movement;GO:0003351//epithelial cilium movement;GO:0007368//determination of left/right symmetry;GO:0007507//heart development;GO:0033146//regulation of intracellular estrogen receptor signaling pathway;GO:0036158//outer dynein arm assembly;GO:0036159//inner dynein arm assembly;GO:0061136//regulation of proteasomal protein catabolic process	GO:0005515//protein binding;GO:0030331//estrogen receptor binding	GO:0005576//extracellular region;GO:0005634//nucleus;GO:0005737//cytoplasm;GO:0005813//centrosome;GO:0005829//cytosol;GO:0005886//plasma membrane;GO:0097730//non-motile cilium
ENSG00000187908	0.03	0.05	-1.07383	0.0476896	down	1755	Q9UGM3	DMBT1	XP_016871287.1	deleted in malignant brain tumors 1 protein isoform X26	K13912	DMBT1	K13912 DMBT1; deleted in malignant brain tumors 1 protein	GO:0002221//pattern recognition receptor signaling pathway;GO:0006897//endocytosis;GO:0007275//multicellular organism development;GO:0015031//protein transport;GO:0016032//viral process;GO:0030855//epithelial cell differentiation;GO:0043152//induction of bacterial agglutination;GO:0044267//cellular protein metabolic process;GO:0045087//innate immune response;GO:0050829//defense response to Gram-n…	GO:0005044//scavenger receptor activity;GO:0005515//protein binding;GO:0008329//signaling pattern recognition receptor activity;GO:0035375//zymogen binding;GO:0048306//calcium-dependent protein binding	GO:0005576//extracellular region;GO:0005615//extracellular space;GO:0005737//cytoplasm;GO:0009897//external side of plasma membrane;GO:0019898//extrinsic component of membrane;GO:0030670//phagocytic vesicle membrane;GO:0031012//extracellular matrix;GO:0042589//zymogen granule membrane;GO:0070062//extracellular exosome
ENSG00000164741	0.06	0.02	1.34596	0.0154624	up	10395	A0A0J9YWS8	DLC1	NP_079043.3	rho GTPase-activating protein 7 isoform 3	K20632	DLC	K20632 DLC; deleted in liver cancer protein
ENSG00000165325	0.02	0	3.53972	0.0217254	up	159989	Q05D60	DEUP1	XP_011540940.1	deuterosome assembly protein 1 isoform X9				GO:0007099//centriole replication;GO:0030030//cell projection organization;GO:0098535//de novo centriole assembly;GO:1903251//multi-ciliated epithelial cell differentiation	GO:0005515//protein binding;GO:0042802//identical protein binding	GO:0005814//centriole;GO:0098536//deuterosome
XLOC_054856	1.99	3.42	-0.778625	0.0458074	down	26063	G3V0I9	DECR2	NP_065715.1	peroxisomal 2,4-dienoyl-CoA reductase	K13237	DECR2	K13237 DECR2; peroxisomal 2,4-dienoyl-CoA reductase [EC:1.3.1.34]
ENSG00000213782	0	0.02	-3.5498	0.0210248	down	51202	F5H1N9	DDX47	NP_957518.1	probable ATP-dependent RNA helicase DDX47 isoform 2	K14777	DDX47	K14777 DDX47; ATP-dependent RNA helicase DDX47/RRP3 [EC:3.6.4.13]	GO:0006364//rRNA processing;GO:0006397//mRNA processing;GO:0008380//RNA splicing;GO:0008625//extrinsic apoptotic signaling pathway via death domain receptors	GO:0003723//RNA binding;GO:0003724//RNA helicase activity;GO:0005515//protein binding;GO:0005524//ATP binding	GO:0005634//nucleus;GO:0005654//nucleoplasm;GO:0005730//nucleolus;GO:0016020//membrane
ENSG00000203797	0.3	0.14	1.11243	0.0263775	up	8528	F2Z2E0	DDO	NP_001355100.1	D-aspartate oxidase isoform d	K00272	DDO	K00272 DDO; D-aspartate oxidase [EC:1.4.3.1]	GO:0006531//aspartate metabolic process;GO:0006533//aspartate catabolic process;GO:0006625//protein targeting to peroxisome;GO:0007320//insemination;GO:0007625//grooming behavior;GO:0019478//D-amino acid catabolic process;GO:0034641//cellular nitrogen compound metabolic process;GO:0042445//hormone metabolic process;GO:0055114//oxidation-reduction process	GO:0003884//D-amino-acid oxidase activity;GO:0005515//protein binding;GO:0008445//D-aspartate oxidase activity;GO:0048037//cofactor binding;GO:0071949//FAD binding	GO:0005737//cytoplasm;GO:0005777//peroxisome;GO:0005782//peroxisomal matrix;GO:0005829//cytosol
ENSG00000181418	0.11	0.23	-0.98489	0.0345872	down	23109	O94850	DDN	NP_055901.2	dendrin				GO:0045944//positive regulation of transcription from RNA polymerase II promoter	GO:0000978//RNA polymerase II core promoter proximal region sequence-specific DNA binding;GO:0005515//protein binding	GO:0005634//nucleus;GO:0005737//cytoplasm;GO:0005789//endoplasmic reticulum membrane;GO:0032591//dendritic spine membrane;GO:0042995//cell projection;GO:0043204//perikaryon
ENSG00000080166	0.02	0	2.59802	0.0196511	up	1638	P40126	DCT	NP_001309114.1	L-dopachrome tautomerase isoform 3	K01827	DCT	K01827 DCT; dopachrome tautomerase [EC:5.3.3.12]	GO:0002052//positive regulation of neuroblast proliferation;GO:0006583//melanin biosynthetic process from tyrosine;GO:0008544//epidermis development;GO:0021847//ventricular zone neuroblast division;GO:0042438//melanin biosynthetic process;GO:0048066//developmental pigmentation;GO:0048468//cell development;GO:0055114//oxidation-reduction process	GO:0004167//dopachrome isomerase activity;GO:0005507//copper ion binding;GO:0016491//oxidoreductase activity	GO:0005829//cytosol;GO:0016021//integral component of membrane;GO:0033162//melanosome membrane;GO:0042470//melanosome
ENSG00000115165	0	0.04	-4.30215	0.00267663	down	9595	C9JNN8	CYTIP	NP_004279.3	cytohesin-interacting protein				GO:0030155//regulation of cell adhesion	GO:0005515//protein binding	GO:0005654//nucleoplasm;GO:0005737//cytoplasm;GO:0005769//early endosome;GO:0005829//cytosol;GO:0005938//cell cortex
ENSG00000186160	0.13	0.26	-1.0283	0.0431646	down	199974	Q86W10	CYP4Z1	XP_024309624.1	cytochrome P450 4Z1 isoform X1	K07429	CYP4Z	K07429 CYP4Z; cytochrome P450 family 4 subfamily Z [EC:1.14.14.1]	GO:0055114//oxidation-reduction process	GO:0005506//iron ion binding;GO:0020037//heme binding;GO:0070330//aromatase activity	GO:0005789//endoplasmic reticulum membrane;GO:0016021//integral component of membrane
ENSG00000186529	0.02	0	2.59702	0.0196989	up	4051	V9GYA1	CYP4F3	XP_011526316.1	docosahexaenoic acid omega-hydroxylase CYP4F3 isoform X3	K17726	CYP4F2_3	K17726 CYP4F2_3; phylloquinone omega-hydroxylase / docosahexaenoic acid omega-hydroxylase / leukotriene-B4 20-monooxygenase [EC:1.14.14.78 1.14.14.79 1.14.14.94]	GO:0006690//icosanoid metabolic process;GO:0006691//leukotriene metabolic process;GO:0036101//leukotriene B4 catabolic process;GO:0055114//oxidation-reduction process	GO:0004497//monooxygenase activity;GO:0005506//iron ion binding;GO:0020037//heme binding;GO:0050051//leukotriene-B4 20-monooxygenase activity	GO:0005789//endoplasmic reticulum membrane;GO:0016021//integral component of membrane
ENSG00000169429	2.52	0.97	1.38283	0.00061325	up	3576	C9J4T6	CXCL8	NP_001341769.1	interleukin-8 isoform 2 precursor	K10030	IL8	K10030 IL8; interleukin 8	GO:0001525//angiogenesis;GO:0002237//response to molecule of bacterial origin;GO:0006935//chemotaxis;GO:0006954//inflammatory response;GO:0006955//immune response;GO:0007050//cell cycle arrest;GO:0007165//signal transduction;GO:0007186//G-protein coupled receptor signaling pathway;GO:0008285//negative regulation of cell proliferation;GO:0019221//cytokine-mediated signaling pathway;GO:0019722//cal…	GO:0005153//interleukin-8 receptor binding;GO:0005515//protein binding;GO:0008009//chemokine activity	GO:0005576//extracellular region;GO:0005615//extracellular space
ENSG00000163739	0.84	0.37	1.17509	0.0121439	up	2919	P09341	CXCL1	NP_001502.1	growth-regulated alpha protein precursor	K05505	CXCL1_2_3	K05505 CXCL1_2_3; C-X-C motif chemokine 1/2/3	GO:0006935//chemotaxis;GO:0006954//inflammatory response;GO:0006955//immune response;GO:0007165//signal transduction;GO:0007186//G-protein coupled receptor signaling pathway;GO:0007399//nervous system development;GO:0008285//negative regulation of cell proliferation;GO:0019221//cytokine-mediated signaling pathway;GO:0030036//actin cytoskeleton organization;GO:0030593//neutrophil chemotaxis;GO:003…	GO:0005102//receptor binding;GO:0008009//chemokine activity;GO:0008047//enzyme activator activity;GO:0008083//growth factor activity	GO:0005576//extracellular region;GO:0005615//extracellular space;GO:0035580//specific granule lumen;GO:1904724//tertiary granule lumen
ENSG00000273559	0.2	0	5.29404	1.84154e-10	up	54883	A0A087WY60	CWC25	NP_060218.1	pre-mRNA-splicing factor CWC25 homolog
XLOC_054937	0.46	0.99	-1.1004	0.00725254	down	9150	A0A0A0MR03	CTDP1	XP_016881567.1	RNA polymerase II subunit A C-terminal domain phosphatase isoform X2	K15732	CTDP1	K15732 CTDP1; RNA polymerase II subunit A C-terminal domain phosphatase [EC:3.1.3.16]	GO:0006366//transcription from RNA polymerase II promoter;GO:0006368//transcription elongation from RNA polymerase II promoter;GO:0006470//protein dephosphorylation;GO:0010458//exit from mitosis;GO:0043923//positive regulation by host of viral transcription;GO:0050434//positive regulation of viral transcription;GO:0051301//cell division;GO:0061052//negative regulation of cell growth involved in c…
ENSG00000121552	0.01	0.1	-2.43097	0.0325956	down	1475	C9J0E4	CSTA	NP_005204.1	cystatin-A	K13907	CSTA_B	K13907 CSTA_B; cystatin-A/B	GO:0010466//negative regulation of peptidase activity;GO:0010951//negative regulation of endopeptidase activity;GO:0018149//peptide cross-linking;GO:0030216//keratinocyte differentiation;GO:0045861//negative regulation of proteolysis;GO:0070268//cornification;GO:0098609//cell-cell adhesion	GO:0002020//protease binding;GO:0004869//cysteine-type endopeptidase inhibitor activity	GO:0001533//cornified envelope;GO:0005615//extracellular space;GO:0005634//nucleus;GO:0005737//cytoplasm;GO:0005829//cytosol
ENSG00000137449	0.01	0.02	-1.62141	0.0452212	down	132864	Q7Z5Q1	CPEB2	XP_016863222.1	cytoplasmic polyadenylation element-binding protein 2 isoform X5	K02602	CPEB	K02602 CPEB; cytoplasmic polyadenylation element-binding protein
XLOC_054813	0.21	0.63	-1.56306	0.00505172	down	64506	A0A087X171	CPEB1	NP_001352172.1	cytoplasmic polyadenylation element-binding protein 1 isoform 6	K02602	CPEB	K02602 CPEB; cytoplasmic polyadenylation element-binding protein
ENSG00000047457	0.84	0.31	1.42982	0.000443509	up	1356	D6RE86	CP	XP_006713564.1	ceruloplasmin isoform X5	K13624	CP	K13624 CP; ceruloplasmin [EC:1.16.3.1]	GO:0006825//copper ion transport;GO:0006826//iron ion transport;GO:0006879//cellular iron ion homeostasis;GO:0043687//post-translational protein modification;GO:0044267//cellular protein metabolic process;GO:0055072//iron ion homeostasis;GO:0055114//oxidation-reduction process	GO:0004322//ferroxidase activity;GO:0005507//copper ion binding;GO:0016491//oxidoreductase activity;GO:0051087//chaperone binding	GO:0005576//extracellular region;GO:0005615//extracellular space;GO:0005765//lysosomal membrane;GO:0005788//endoplasmic reticulum lumen;GO:0005886//plasma membrane;GO:0070062//extracellular exosome;GO:0072562//blood microparticle
ENSG00000161281	0.2	0.02	2.59764	0.0196693	up	1346	K7ER11	COX7A1	NP_001855.1	cytochrome c oxidase subunit 7A1, mitochondrial precursor	K02270	COX7A	K02270 COX7A; cytochrome c oxidase subunit 7a	GO:0002082//regulation of oxidative phosphorylation;GO:0006091//generation of precursor metabolites and energy;GO:0022900//electron transport chain;GO:0097250//mitochondrial respiratory chain supercomplex assembly;GO:1902600//hydrogen ion transmembrane transport	GO:0004129//cytochrome-c oxidase activity	GO:0005739//mitochondrion;GO:0005746//mitochondrial respiratory chain;GO:0016021//integral component of membrane
ENSG00000149600	0.07	0.02	1.86495	0.0310806	up	149951	V9GY66	COMMD7	XP_016883174.1	COMM domain-containing protein 7 isoform X4	K22563	COMMD7	K22563 COMMD7; COMM domain containing 7	GO:0032088//negative regulation of NF-kappaB transcription factor activity;GO:0033209//tumor necrosis factor-mediated signaling pathway;GO:0045892//negative regulation of transcription, DNA-templated	GO:0005515//protein binding;GO:0051059//NF-kappaB binding	GO:0031410//cytoplasmic vesicle;GO:0043231//intracellular membrane-bounded organelle
ENSG00000080573	0.22	0.12	0.846995	0.0498373	up	50509	P25940	COL5A3	XP_011526344.1	collagen alpha-3(V) chain isoform X1	K19721	COL5AS	K19721 COL5AS; collagen, type V/XI/XXIV/XXVII, alpha	GO:0007155//cell adhesion;GO:0007160//cell-matrix adhesion;GO:0030198//extracellular matrix organization;GO:0030199//collagen fibril organization;GO:0043588//skin development	GO:0005201//extracellular matrix structural constituent;GO:0005518//collagen binding;GO:0008201//heparin binding;GO:0030020//extracellular matrix structural constituent conferring tensile strength;GO:0043394//proteoglycan binding	GO:0005576//extracellular region;GO:0005588//collagen type V trimer;GO:0005615//extracellular space;GO:0005788//endoplasmic reticulum lumen;GO:0031012//extracellular matrix
ENSG00000164692	0.01	0	3.53972	0.0217254	up	1278	A0A087WTA8	COL1A2	NP_000080.2	collagen alpha-2(I) chain precursor	K06236	COL1A	K06236 COL1A; collagen, type I, alpha	GO:0001501//skeletal system development;GO:0001568//blood vessel development;GO:0007179//transforming growth factor beta receptor signaling pathway;GO:0007266//Rho protein signal transduction;GO:0007596//blood coagulation;GO:0008217//regulation of blood pressure;GO:0019221//cytokine-mediated signaling pathway;GO:0030168//platelet activation;GO:0030198//extracellular matrix organization;GO:0030199…	GO:0002020//protease binding;GO:0005201//extracellular matrix structural constituent;GO:0005515//protein binding;GO:0030020//extracellular matrix structural constituent conferring tensile strength;GO:0030674//protein binding, bridging;GO:0042802//identical protein binding;GO:0046332//SMAD binding;GO:0046872//metal ion binding;GO:0048407//platelet-derived growth factor binding	GO:0005576//extracellular region;GO:0005584//collagen type I trimer;GO:0005615//extracellular space;GO:0005783//endoplasmic reticulum;GO:0005788//endoplasmic reticulum lumen;GO:0031012//extracellular matrix;GO:0070062//extracellular exosome
ENSG00000065618	1.15	0.56	1.03872	0.00779135	up	1308	A0A3B3IUC2	COL17A1	NP_000485.3	collagen alpha-1(XVII) chain	K07603	COL17A	K07603 COL17A; collagen, type XVII, alpha	GO:0007160//cell-matrix adhesion;GO:0008544//epidermis development;GO:0030198//extracellular matrix organization;GO:0031581//hemidesmosome assembly;GO:0050776//regulation of immune response	GO:0005201//extracellular matrix structural constituent;GO:0005515//protein binding;GO:0030020//extracellular matrix structural constituent conferring tensile strength	GO:0005576//extracellular region;GO:0005581//collagen trimer;GO:0005604//basement membrane;GO:0005615//extracellular space;GO:0005788//endoplasmic reticulum lumen;GO:0005886//plasma membrane;GO:0005887//integral component of plasma membrane;GO:0005911//cell-cell junction;GO:0030056//hemidesmosome;GO:0031012//extracellular matrix
ENSG00000283378	0.65	0.27	1.24225	0.0064038	up	100289279	A0A1B0GTE1	CNTNAP3C	XP_016870869.1	contactin-associated protein-like 3 isoform X1				-	-	GO:0016021//integral component of membrane
ENSG00000154529	0.02	0	2.17658	0.00909413	up	728577	A0A2P0CT92	CNTNAP3B	NP_001188309.2	contactin-associated protein-like 3B precursor				GO:0007155//cell adhesion	-	GO:0016021//integral component of membrane
ENSG00000188822	0.02	0.01	2.11829	0.0270785	up	1269	A0A024RAH7	CNR2	NP_001832.1	cannabinoid receptor 2	K04278	CNR2	K04278 CNR2; cannabinoid receptor 2	GO:0001975//response to amphetamine;GO:0006954//inflammatory response;GO:0006955//immune response;GO:0007186//G-protein coupled receptor signaling pathway;GO:0007187//G-protein coupled receptor signaling pathway, coupled to cyclic nucleotide second messenger;GO:0019233//sensory perception of pain;GO:0030595//leukocyte chemotaxis;GO:0032229//negative regulation of synaptic transmission, GABAergic;…	GO:0004949//cannabinoid receptor activity	GO:0005886//plasma membrane;GO:0005887//integral component of plasma membrane;GO:0030425//dendrite;GO:0031234//extrinsic component of cytoplasmic side of plasma membrane;GO:0043204//perikaryon
ENSG00000136110	0	0.04	-3.84588	0.010314	down	11061	E9PKI9	CNMD	NP_008946.1	leukocyte cell-derived chemotaxin 1 isoform 1 precursor				GO:0001501//skeletal system development;GO:0001886//endothelial cell morphogenesis;GO:0001937//negative regulation of endothelial cell proliferation;GO:0006029//proteoglycan metabolic process;GO:0016525//negative regulation of angiogenesis;GO:0030948//negative regulation of vascular endothelial growth factor receptor signaling pathway;GO:0051216//cartilage development	-	GO:0005576//extracellular region;GO:0012505//endomembrane system;GO:0016021//integral component of membrane
ENSG00000079101	0.02	0	3.53942	0.0217352	up	27098	F5GWQ8	CLUL1	NP_954636.1	clusterin-like protein 1 isoform b precursor				-	GO:0051787//misfolded protein binding	GO:0005615//extracellular space;GO:0005634//nucleus
XLOC_055360	0.1	0.3	-1.4803	0.0307246	down	2055	A0A1B0GU79	CLN8	XP_005266078.1	protein CLN8 isoform X1	K12360	CLN8	K12360 CLN8; ceroid-lipofuscinosis neuronal protein 8
ENSG00000187912	0.08	0.01	2.68393	0.00275235	up	388512	F8W1T8	CLEC17A	XP_016882276.1	C-type lectin domain family 17, member A isoform X1	K17513	CLEC17A	K17513 CLEC17A; C-type lectin superfamily 17 member A	-	GO:0005537//mannose binding;GO:0042806//fucose binding;GO:0046872//metal ion binding	GO:0009986//cell surface;GO:0016021//integral component of membrane
ENSG00000213937	0.31	0.63	-1.03761	0.0233215	down	9080	O95484	CLDN9	NP_066192.1	claudin-9	K06087	CLDN	K06087 CLDN; claudin	GO:0016338//calcium-independent cell-cell adhesion via plasma membrane cell-adhesion molecules;GO:0046718//viral entry into host cell	GO:0001618//virus receptor activity;GO:0005198//structural molecule activity;GO:0005515//protein binding;GO:0042802//identical protein binding	GO:0005886//plasma membrane;GO:0005923//bicellular tight junction;GO:0016021//integral component of membrane;GO:0030054//cell junction;GO:0043231//intracellular membrane-bounded organelle
ENSG00000104879	0.03	0.16	-2.36359	0.00155931	down	1158	P06732	CKM	NP_001815.2	creatine kinase M-type	K00933	E2.7.3.2	K00933 E2.7.3.2; creatine kinase [EC:2.7.3.2]	GO:0006600//creatine metabolic process;GO:0016310//phosphorylation;GO:0046314//phosphocreatine biosynthetic process	GO:0004111//creatine kinase activity;GO:0005515//protein binding;GO:0005524//ATP binding;GO:0016301//kinase activity	GO:0005615//extracellular space;GO:0005829//cytosol
ENSG00000157884	0.29	0.03	3.01824	0.000474392	up	130106	A0PJX0	CIB4	XP_024308460.1	calcium and integrin-binding family member 4 isoform X3				-	GO:0000287//magnesium ion binding;GO:0005509//calcium ion binding;GO:0005515//protein binding	-
ENSG00000124302	0.3	0.14	1.02461	0.0335649	up	64377	Q9H2A9	CHST8	NP_001121368.1	carbohydrate sulfotransferase 8	K09672	CHST8	K09672 CHST8; carbohydrate 4-sulfotransferase 8 [EC:2.8.2.-]	GO:0006790//sulfur compound metabolic process;GO:0007417//central nervous system development;GO:0016051//carbohydrate biosynthetic process;GO:0030166//proteoglycan biosynthetic process;GO:0042446//hormone biosynthetic process	GO:0001537//N-acetylgalactosamine 4-O-sulfotransferase activity;GO:0008146//sulfotransferase activity	GO:0000139//Golgi membrane;GO:0016021//integral component of membrane
ENSG00000101204	0.14	0.06	1.16018	0.0160807	up	1137	P43681	CHRNA4	NP_001243502.1	neuronal acetylcholine receptor subunit alpha-4 isoform 2	K04806	CHRNA4	K04806 CHRNA4; nicotinic acetylcholine receptor alpha-4	GO:0001508//action potential;GO:0001666//response to hypoxia;GO:0006281//DNA repair;GO:0006811//ion transport;GO:0006816//calcium ion transport;GO:0006979//response to oxidative stress;GO:0007165//signal transduction;GO:0007268//chemical synaptic transmission;GO:0007271//synaptic transmission, cholinergic;GO:0007274//neuromuscular synaptic transmission;GO:0007585//respiratory gaseous exchange;GO:…	GO:0005230//extracellular ligand-gated ion channel activity;GO:0005515//protein binding;GO:0015276//ligand-gated ion channel activity;GO:0015464//acetylcholine receptor activity;GO:0022848//acetylcholine-gated cation channel activity;GO:0042166//acetylcholine binding	GO:0005886//plasma membrane;GO:0005887//integral component of plasma membrane;GO:0005892//acetylcholine-gated channel complex;GO:0009897//external side of plasma membrane;GO:0016020//membrane;GO:0016021//integral component of membrane;GO:0030054//cell junction;GO:0030425//dendrite;GO:0043005//neuron projection;GO:0043025//neuronal cell body;GO:0045202//synapse;GO:0045211//postsynaptic membrane;GO…
ENSG00000184984	0.01	0.03	-2.39179	0.0100076	down	1133	A0A024R9I2	CHRM5	NP_036257.1	muscarinic acetylcholine receptor M5	K04133	CHRM5	K04133 CHRM5; muscarinic acetylcholine receptor M5	GO:0001696//gastric acid secretion;GO:0007186//G-protein coupled receptor signaling pathway;GO:0007187//G-protein coupled receptor signaling pathway, coupled to cyclic nucleotide second messenger;GO:0007197//adenylate cyclase-inhibiting G-protein coupled acetylcholine receptor signaling pathway;GO:0007213//G-protein coupled acetylcholine receptor signaling pathway;GO:0007268//chemical synaptic tr…	GO:0004435//phosphatidylinositol phospholipase C activity;GO:0004930//G-protein coupled receptor activity;GO:0004993//G-protein coupled serotonin receptor activity;GO:0016907//G-protein coupled acetylcholine receptor activity;GO:0030594//neurotransmitter receptor activity	GO:0005886//plasma membrane;GO:0005887//integral component of plasma membrane;GO:0030054//cell junction;GO:0030425//dendrite;GO:0045211//postsynaptic membrane
ENSG00000168539	0.01	0.04	-1.99277	0.0408968	down	1128	F5GZF8	CHRM1	NP_000729.2	muscarinic acetylcholine receptor M1	K04129	CHRM1	K04129 CHRM1; muscarinic acetylcholine receptor M1	GO:0007165//signal transduction;GO:0007186//G-protein coupled receptor signaling pathway;GO:0007187//G-protein coupled receptor signaling pathway, coupled to cyclic nucleotide second messenger;GO:0007197//adenylate cyclase-inhibiting G-protein coupled acetylcholine receptor signaling pathway;GO:0007205//protein kinase C-activating G-protein coupled receptor signaling pathway;GO:0007207//phospholi…	GO:0004435//phosphatidylinositol phospholipase C activity;GO:0004930//G-protein coupled receptor activity;GO:0004993//G-protein coupled serotonin receptor activity;GO:0016907//G-protein coupled acetylcholine receptor activity;GO:0030594//neurotransmitter receptor activity;GO:0099529//neurotransmitter receptor activity involved in regulation of postsynaptic membrane potential	GO:0005886//plasma membrane;GO:0005887//integral component of plasma membrane;GO:0016020//membrane;GO:0030054//cell junction;GO:0030425//dendrite;GO:0043679//axon terminus;GO:0098978//glutamatergic synapse;GO:0098981//cholinergic synapse;GO:0099056//integral component of presynaptic membrane;GO:0099061//integral component of postsynaptic density membrane
ENSG00000110172	0.05	0.67	-3.74816	5.93267e-15	down	26973	E9PIF7	CHORDC1	XP_016873029.1	cysteine and histidine-rich domain-containing protein 1 isoform X1	K16729	CHORDC1	K16729 CHORDC1; cysteine and histidine-rich domain-containing protein 1
ENSG00000100288	0.17	0.02	2.83216	7.27676e-05	up	1120	A0A024R4X4	CHKB	NP_005189.2	choline/ethanolamine kinase	K14156	CHK	K14156 CHK; choline/ethanolamine kinase [EC:2.7.1.32 2.7.1.82]	GO:0006646//phosphatidylethanolamine biosynthetic process;GO:0006656//phosphatidylcholine biosynthetic process;GO:0006657//CDP-choline pathway;GO:0007517//muscle organ development;GO:0016310//phosphorylation	GO:0004103//choline kinase activity;GO:0004305//ethanolamine kinase activity;GO:0005524//ATP binding	GO:0005829//cytosol
ENSG00000189052	0.05	0	3.53942	0.0217352	up	93659	A0A0F7RQP8	CGB5	NP_149032.1	chorionic gonadotropin, beta polypeptide 5 precursor	K10045	CGB	K10045 CGB; chorionic gonadotropin, beta polypeptide
ENSG00000213085	0.34	0.18	0.954647	0.0499349	up	25790	Q9UL16	CFAP45	NP_036469.2	cilia- and flagella-associated protein 45				-	-	GO:0005634//nucleus;GO:0005654//nucleoplasm;GO:0005929//cilium
ENSG00000156206	0.06	0.23	-1.91737	0.00240447	down	161502	Q6P656	CFAP161	XP_006720471.1	cilia- and flagella-associated protein 161 isoform X1
ENSG00000143702	0.34	0.16	1.10693	0.00743102	up	9859	E5RIH6	CEP170	XP_016858429.1	centrosomal protein of 170 kDa isoform X9	K16463	CEP170	K16463 CEP170; centrosomal protein CEP170
ENSG00000251503	0.46	0.85	-0.877269	0.0451427	down	100526739	A0A0U1RQL5	CENPS-CORT	NP_001230697.1	APITD1-CORT protein isoform 3	K11511	APITD1	K11511 APITD1; centromere protein S
ENSG00000184524	0.01	0.07	-2.1366	0.0256396	down	51286	Q8N111	CEND1	NP_057648.2	cell cycle exit and neuronal differentiation protein 1				GO:0007628//adult walking behavior;GO:0008150//biological_process;GO:0021686//cerebellar granular layer maturation;GO:0021702//cerebellar Purkinje cell differentiation;GO:0021933//radial glia guided migration of cerebellar granule cell;GO:0021941//negative regulation of cerebellar granule cell precursor proliferation;GO:0030182//neuron differentiation	GO:0003674//molecular_function;GO:0005515//protein binding	GO:0005739//mitochondrion;GO:0016021//integral component of membrane;GO:0031982//vesicle
ENSG00000215704	0.88	1.59	-0.854178	0.046491	down	51032	Q5JRU4	CELA2B	NP_056933.3	chymotrypsin-like elastase family member 2B preproprotein	K01346	CELA2	K01346 CELA2; pancreatic elastase II [EC:3.4.21.71]	GO:0006508//proteolysis	GO:0004252//serine-type endopeptidase activity	GO:0005576//extracellular region;GO:0005615//extracellular space
ENSG00000142615	0.05	0.16	-1.62333	0.0449675	down	63036	P08217	CELA2A	NP_254275.1	chymotrypsin-like elastase family member 2A preproprotein	K01346	CELA2	K01346 CELA2; pancreatic elastase II [EC:3.4.21.71]	GO:0006508//proteolysis;GO:0070268//cornification	GO:0004252//serine-type endopeptidase activity;GO:0017171//serine hydrolase activity	GO:0005576//extracellular region;GO:0005615//extracellular space;GO:0005829//cytosol;GO:0036457//keratohyalin granule
ENSG00000129596	0	0.03	-3.54922	0.0210434	down	1036	Q16878	CDO1	NP_001310495.1	cysteine dioxygenase type 1 isoform 3	K00456	CDO1	K00456 CDO1; cysteine dioxygenase [EC:1.13.11.20]	GO:0000097//sulfur amino acid biosynthetic process;GO:0006534//cysteine metabolic process;GO:0006954//inflammatory response;GO:0007595//lactation;GO:0019448//L-cysteine catabolic process;GO:0033762//response to glucagon;GO:0042412//taurine biosynthetic process;GO:0043200//response to amino acid;GO:0045471//response to ethanol;GO:0051384//response to glucocorticoid;GO:0051591//response to cAMP;GO:…	GO:0008198//ferrous iron binding;GO:0016702//oxidoreductase activity, acting on single donors with incorporation of molecular oxygen, incorporation of two atoms of oxygen;GO:0017172//cysteine dioxygenase activity	GO:0005829//cytosol
ENSG00000113100	0.03	0	2.41436	0.0340333	up	1007	D6RBT9	CDH9	NP_057363.3	cadherin-9 preproprotein	K06801	CDH9	K06801 CDH9; cadherin 9, type 2, T1-cadherin	GO:0000902//cell morphogenesis;GO:0007043//cell-cell junction assembly;GO:0007156//homophilic cell adhesion via plasma membrane adhesion molecules;GO:0007416//synapse assembly;GO:0016339//calcium-dependent cell-cell adhesion via plasma membrane cell adhesion molecules;GO:0034332//adherens junction organization;GO:0044331//cell-cell adhesion mediated by cadherin;GO:0098609//cell-cell adhesion;GO:0…	GO:0003674//molecular_function;GO:0005509//calcium ion binding;GO:0008092//cytoskeletal protein binding;GO:0042803//protein homodimerization activity;GO:0045296//cadherin binding	GO:0005886//plasma membrane;GO:0005913//cell-cell adherens junction;GO:0009986//cell surface;GO:0016342//catenin complex;GO:0099055//integral component of postsynaptic membrane;GO:0099056//integral component of presynaptic membrane
ENSG00000161649	0.03	0	2.59836	0.0196349	up	146894	Q6UXG3	CD300LG	XP_006721784.1	CMRF35-like molecule 9 isoform X1	K16663	CD300LG	K16663 CD300LG; CMRF35-like molecule 9	GO:0002376//immune system process;GO:0050776//regulation of immune response	GO:0005515//protein binding	GO:0005886//plasma membrane;GO:0016021//integral component of membrane;GO:0016323//basolateral plasma membrane;GO:0016324//apical plasma membrane;GO:0032585//multivesicular body membrane
ENSG00000158473	0.03	0	3.83585	0.0107249	up	912	P15813	CD1D	XP_006711684.1	antigen-presenting glycoprotein CD1d isoform X2	K06448	CD1	K06448 CD1; T-cell surface glycoprotein CD1	GO:0001916//positive regulation of T cell mediated cytotoxicity;GO:0006955//immune response;GO:0016045//detection of bacterium;GO:0034113//heterotypic cell-cell adhesion;GO:0042102//positive regulation of T cell proliferation;GO:0045058//T cell selection;GO:0045087//innate immune response;GO:0045089//positive regulation of innate immune response;GO:0048006//antigen processing and presentation, en…	GO:0005515//protein binding;GO:0030881//beta-2-microglobulin binding;GO:0030882//lipid antigen binding;GO:0030883//endogenous lipid antigen binding;GO:0030884//exogenous lipid antigen binding;GO:0042393//histone binding;GO:0050839//cell adhesion molecule binding;GO:0071723//lipopeptide binding	GO:0005615//extracellular space;GO:0005737//cytoplasm;GO:0005765//lysosomal membrane;GO:0005783//endoplasmic reticulum;GO:0005789//endoplasmic reticulum membrane;GO:0005886//plasma membrane;GO:0005887//integral component of plasma membrane;GO:0009897//external side of plasma membrane;GO:0009986//cell surface;GO:0010008//endosome membrane;GO:0016323//basolateral plasma membrane
ENSG00000205089	0.06	0.02	1.60259	0.0479158	up	645121	Q6ZMN8	CCNI2	NP_001034869.1	cyclin-I2 isoform 2				GO:0000079//regulation of cyclin-dependent protein serine/threonine kinase activity;GO:0006468//protein phosphorylation;GO:0044772//mitotic cell cycle phase transition	GO:0004672//protein kinase activity;GO:0016538//cyclin-dependent protein serine/threonine kinase regulator activity;GO:0019901//protein kinase binding	GO:0000307//cyclin-dependent protein kinase holoenzyme complex;GO:0005634//nucleus;GO:0005737//cytoplasm
ENSG00000136999	0.06	0.21	-1.7405	0.00193352	down	4856	A0A024R9J4	CCN3	NP_002505.1	CCN family member 3 precursor	K23571	NOV	K23571 NOV; insulin-like growth factor-binding protein 9	GO:0001525//angiogenesis;GO:0002062//chondrocyte differentiation;GO:0007155//cell adhesion;GO:0007165//signal transduction;GO:0010468//regulation of gene expression;GO:0010761//fibroblast migration;GO:0010832//negative regulation of myotube differentiation;GO:0014909//smooth muscle cell migration;GO:0030308//negative regulation of cell growth;GO:0033627//cell adhesion mediated by integrin;GO:0035…	GO:0005112//Notch binding;GO:0005178//integrin binding;GO:0005515//protein binding;GO:0005520//insulin-like growth factor binding;GO:0008083//growth factor activity;GO:0008201//heparin binding	GO:0005576//extracellular region;GO:0005737//cytoplasm;GO:0005921//gap junction;GO:0030424//axon;GO:0030425//dendrite;GO:0031012//extracellular matrix;GO:0043025//neuronal cell body;GO:0043231//intracellular membrane-bounded organelle
ENSG00000142871	57.86	34.3	0.754447	0.044365	up	3491	Q6FI18	CCN1	NP_001545.2	CCN family member 1 precursor	K06829	CYR61	K06829 CYR61; insulin-like growth factor-binding protein 10	GO:0001649//osteoblast differentiation;GO:0001934//positive regulation of protein phosphorylation;GO:0002041//intussusceptive angiogenesis;GO:0003181//atrioventricular valve morphogenesis;GO:0003278//apoptotic process involved in heart morphogenesis;GO:0003281//ventricular septum development;GO:0006935//chemotaxis;GO:0007155//cell adhesion;GO:0010518//positive regulation of phospholipase activity…	GO:0005178//integrin binding;GO:0005201//extracellular matrix structural constituent;GO:0005520//insulin-like growth factor binding;GO:0008201//heparin binding;GO:0050840//extracellular matrix binding	GO:0005788//endoplasmic reticulum lumen;GO:0031012//extracellular matrix
ENSG00000115009	1.65	0.44	1.88367	5.08659e-05	up	6364	P78556	CCL20	NP_001123518.1	C-C motif chemokine 20 isoform 2 precursor	K14625	CCL20	K14625 CCL20; C-C motif chemokine 20	GO:0002548//monocyte chemotaxis;GO:0006935//chemotaxis;GO:0006954//inflammatory response;GO:0006955//immune response;GO:0007165//signal transduction;GO:0007186//G-protein coupled receptor signaling pathway;GO:0007267//cell-cell signaling;GO:0019221//cytokine-mediated signaling pathway;GO:0030593//neutrophil chemotaxis;GO:0035584//calcium-mediated signaling using intracellular calcium source;GO:00…	GO:0005515//protein binding;GO:0008009//chemokine activity;GO:0031731//CCR6 chemokine receptor binding;GO:0048020//CCR chemokine receptor binding	GO:0005576//extracellular region;GO:0005615//extracellular space
ENSG00000162004	0.57	0.3	0.903124	0.030421	up	124093	I3L158	CCDC78	XP_011520664.1	coiled-coil domain-containing protein 78 isoform X8	K23693	CCDC78	K23693 CCDC78; coiled-coil domain-containing protein 78	GO:0003009//skeletal muscle contraction;GO:0030030//cell projection organization;GO:0098535//de novo centriole assembly	-	GO:0005814//centriole;GO:0016529//sarcoplasmic reticulum;GO:0042383//sarcolemma;GO:0048471//perinuclear region of cytoplasm;GO:0098536//deuterosome
ENSG00000230561	1.14	2.14	-0.910509	0.0272423	down	728586	P0DO97	CCDC192	XP_016865297.1	coiled-coil domain-containing protein 192 isoform X3
ENSG00000185860	0.13	0.03	1.98235	0.00236862	up	339512	Q86UF4	CCDC190	XP_006711352.1	coiled-coil domain-containing protein 190 isoform X3
ENSG00000248712	0.72	0.39	0.903831	0.0400835	up	283152	Q494R4	CCDC153	NP_001138490.1	coiled-coil domain-containing protein 153				-	GO:0005515//protein binding	-
ENSG00000118307	0.13	0.06	1.18801	0.046893	up	55259	G3V3G6	CASC1	XP_011519029.1	protein CASC1 isoform X8	K17580	CASC1	K17580 CASC1; cancer susceptibility candidate protein 1
ENSG00000143933	0.01	0	3.5395	0.0217325	up	805	M0QZ52	CALM2	NP_001292553.1	calmodulin-2 isoform 1	K02183	CALM	K02183 CALM; calmodulin	GO:0002027//regulation of heart rate;GO:0005513//detection of calcium ion;GO:0007186//G-protein coupled receptor signaling pathway;GO:0010800//positive regulation of peptidyl-threonine phosphorylation;GO:0010801//negative regulation of peptidyl-threonine phosphorylation;GO:0010880//regulation of release of sequestered calcium ion into cytosol by sarcoplasmic reticulum;GO:0010881//regulation of ca…	GO:0005509//calcium ion binding;GO:0005515//protein binding;GO:0008179//adenylate cyclase binding;GO:0010856//adenylate cyclase activator activity;GO:0019855//calcium channel inhibitor activity;GO:0019901//protein kinase binding;GO:0019904//protein domain specific binding;GO:0031432//titin binding;GO:0031997//N-terminal myristoylation domain binding;GO:0043539//protein serine/threonine kinase act…	GO:0000922//spindle pole;GO:0005634//nucleus;GO:0005737//cytoplasm;GO:0005813//centrosome;GO:0005876//spindle microtubule;GO:0005886//plasma membrane;GO:0030017//sarcomere;GO:0031982//vesicle;GO:0032991//macromolecular complex;GO:0034704//calcium channel complex;GO:1902494//catalytic complex
ENSG00000183128	0.11	0.01	2.77585	0.001755	up	119395	Q86XJ0	CALHM3	NP_001123214.1	calcium homeostasis modulator protein 3	K19740	CALHM3	K19740 CALHM3; calcium homeostasis modulator protein 3	GO:0006811//ion transport	GO:0005515//protein binding	GO:0005887//integral component of plasma membrane
ENSG00000164304	0.06	0.02	1.59271	0.0248418	up	285782	D6RCC6	CAGE1	NP_001164164.1	cancer-associated gene 1 protein isoform 2				-	GO:0005515//protein binding	-
ENSG00000081803	0.01	0	4.08165	0.00543808	up	93664	H0Y8B5	CADPS2	NP_001350322.1	calcium-dependent secretion activator 2 isoform h	K19933	CADPS	K19933 CADPS; calcium-dependent secretion activator	GO:0006887//exocytosis;GO:0009267//cellular response to starvation;GO:0015031//protein transport;GO:0016082//synaptic vesicle priming;GO:0045921//positive regulation of exocytosis;GO:1990504//dense core granule exocytosis	GO:0008289//lipid binding;GO:0046872//metal ion binding	GO:0005654//nucleoplasm;GO:0030054//cell junction;GO:0030659//cytoplasmic vesicle membrane;GO:0042734//presynaptic membrane;GO:0043231//intracellular membrane-bounded organelle;GO:0045211//postsynaptic membrane;GO:0098978//glutamatergic synapse
ENSG00000151062	0	0.01	-4.09338	0.00517884	down	93589	K7ER25	CACNA2D4	XP_011519343.1	voltage-dependent calcium channel subunit alpha-2/delta-4 isoform X1	K04861	CACNA2D4	K04861 CACNA2D4; voltage-dependent calcium channel alpha-2/delta-4
ENSG00000188959	0.02	0	3.83564	0.010729	up	401546	Q5JTZ5	C9orf152	NP_001013011.2	uncharacterized protein C9orf152
ENSG00000184530	0.1	0.23	-1.2421	0.0480108	down	352999	Q6P5S2	C6orf58	NP_001010905.1	protein LEG1 homolog precursor				GO:0007275//multicellular organism development	-	GO:0005615//extracellular space;GO:0070062//extracellular exosome
ENSG00000185689	0	0.02	-3.55069	0.0209967	down	404220	Q7Z4U5	C6orf201	XP_011512915.1	uncharacterized protein C6orf201 isoform X2
XLOC_055257	0.21	0.1	1.0965	0.031741	up	221545	Q5SQH8	C6orf136	XP_011512686.1	uncharacterized protein C6orf136 isoform X1
XLOC_055310	0.98	0.37	1.41837	0.00101883	up	221545	Q5SQH8	C6orf136	XP_011512686.1	uncharacterized protein C6orf136 isoform X1
ENSG00000225556	0	0.03	-3.54843	0.0210685	down	100191040	B7Z1M9	C2CD4D	XP_016855478.1	C2 calcium-dependent domain-containing protein 4D isoform X1
ENSG00000143110	0.18	0.34	-0.960938	0.0423486	down	128346	Q8NEQ5	C1orf162	NP_001287763.1	transmembrane protein C1orf162 isoform 2				-	-	GO:0016021//integral component of membrane
ENSG00000188032	0.07	0.01	2.59792	0.019656	up	646457	A0A0A0MRA4	C19orf67	NP_001264307.1	UPF0575 protein C19orf67
ENSG00000187624	0.06	0.01	1.97122	0.0433185	up	400566	H7C5B9	C17orf97	NP_001013694.4	protein LIAT1
ENSG00000198797	0.02	0	4.29225	0.00281629	up	57795	Q9C0B6	BRINP2	XP_011508128.1	BMP/retinoic acid-inducible neural-specific protein 2 isoform X2				GO:0007050//cell cycle arrest;GO:0045666//positive regulation of neuron differentiation;GO:0045930//negative regulation of mitotic cell cycle;GO:0071300//cellular response to retinoic acid	-	GO:0005576//extracellular region;GO:0005783//endoplasmic reticulum;GO:0030425//dendrite;GO:0043025//neuronal cell body
ENSG00000164619	1.77	1.05	0.759263	0.047629	up	168667	A0A3B3IUC5	BMPER	XP_016867290.1	BMP-binding endothelial regulator protein isoform X3				GO:0001657//ureteric bud development;GO:0002043//blood vessel endothelial cell proliferation involved in sprouting angiogenesis;GO:0010594//regulation of endothelial cell migration;GO:0030514//negative regulation of BMP signaling pathway;GO:0042118//endothelial cell activation;GO:0048839//inner ear development;GO:0060393//regulation of pathway-restricted SMAD protein phosphorylation;GO:0070374//p…	-	GO:0005615//extracellular space
ENSG00000095585	0.06	0.01	2.76095	0.0114323	up	29760	Q8WV28	BLNK	XP_016871648.1	B-cell linker protein isoform X2	K07371	BLNK	K07371 BLNK; B-cell linker protein	GO:0006954//inflammatory response;GO:0006959//humoral immune response;GO:0007169//transmembrane receptor protein tyrosine kinase signaling pathway;GO:0009967//positive regulation of signal transduction;GO:0030183//B cell differentiation;GO:0035556//intracellular signal transduction	GO:0005068//transmembrane receptor protein tyrosine kinase adaptor activity;GO:0005070//SH3/SH2 adaptor activity;GO:0005515//protein binding	GO:0005737//cytoplasm;GO:0005829//cytosol;GO:0005886//plasma membrane;GO:0036464//cytoplasmic ribonucleoprotein granule
ENSG00000142959	0.07	0.01	2.17773	0.00905638	up	266675	Q8NFU0	BEST4	NP_695006.1	bestrophin-4	K13881	BEST4	K13881 BEST4; bestrophin-4	GO:0008150//biological_process;GO:1902476//chloride transmembrane transport	GO:0003674//molecular_function;GO:0005254//chloride channel activity	GO:0005886//plasma membrane;GO:0034707//chloride channel complex
ENSG00000039987	0	0.05	-4.48624	0.0014044	down	54831	Q8NFU1	BEST2	NP_060152.2	bestrophin-2	K13879	BEST2	K13879 BEST2; bestrophin-2	GO:0007608//sensory perception of smell;GO:0008150//biological_process;GO:0051899//membrane depolarization;GO:1902476//chloride transmembrane transport	GO:0003674//molecular_function;GO:0005254//chloride channel activity	GO:0005886//plasma membrane;GO:0005929//cilium;GO:0034707//chloride channel complex
ENSG00000196289	0.01	0.06	-2.43353	0.0324146	down	441925	A8MW95	BECN2	NP_001277622.1	beclin-2	K08334	BECN	K08334 BECN; beclin	GO:0000045//autophagosome assembly;GO:0006914//autophagy;GO:0006995//cellular response to nitrogen starvation;GO:0008333//endosome to lysosome transport;GO:0032258//CVT pathway;GO:0042593//glucose homeostasis;GO:0045324//late endosome to vacuole transport;GO:1990172//G-protein coupled receptor catabolic process	GO:0005515//protein binding;GO:0044877//macromolecular complex binding	GO:0000407//pre-autophagosomal structure;GO:0019898//extrinsic component of membrane;GO:0034271//phosphatidylinositol 3-kinase complex, class III, type I;GO:0034272//phosphatidylinositol 3-kinase complex, class III, type II
ENSG00000161267	0.01	0.09	-3.14213	6.31469e-06	down	622	A0A384MTY4	BDH1	XP_016862502.1	D-beta-hydroxybutyrate dehydrogenase, mitochondrial isoform X5	K00019	E1.1.1.30	K00019 E1.1.1.30; 3-hydroxybutyrate dehydrogenase [EC:1.1.1.30]
ENSG00000131668	0	0.03	-3.54804	0.0210811	down	56033	Q9HBU1	BARX1	NP_067545.3	homeobox protein BarH-like 1	K09361	BARX	K09361 BARX; BarH-like homeobox	GO:0006357//regulation of transcription from RNA polymerase II promoter;GO:0007267//cell-cell signaling;GO:0009888//tissue development;GO:0009952//anterior/posterior pattern specification;GO:0030178//negative regulation of Wnt signaling pathway;GO:0030855//epithelial cell differentiation;GO:0045944//positive regulation of transcription from RNA polymerase II promoter;GO:0048513//animal organ deve…	GO:0000977//RNA polymerase II regulatory region sequence-specific DNA binding;GO:0000981//RNA polymerase II transcription factor activity, sequence-specific DNA binding;GO:0001228//transcriptional activator activity, RNA polymerase II transcription regulatory region sequence-specific binding;GO:0003700//transcription factor activity, sequence-specific DNA binding	GO:0005634//nucleus
ENSG00000112309	0	0.02	-2.60652	0.00399322	down	135152	A0A087WXU9	B3GAT2	NP_542780.1	galactosylgalactosylxylosylprotein 3-beta-glucuronosyltransferase 2	K10157	B3GAT2	K10157 B3GAT2; galactosylgalactosylxylosylprotein 3-beta-glucuronosyltransferase 2 [EC:2.4.1.135]	GO:0006486//protein glycosylation;GO:0030203//glycosaminoglycan metabolic process;GO:0050650//chondroitin sulfate proteoglycan biosynthetic process	GO:0015018//galactosylgalactosylxylosylprotein 3-beta-glucuronosyltransferase activity;GO:0046872//metal ion binding	GO:0000139//Golgi membrane;GO:0016021//integral component of membrane
ENSG00000205464	2.01	1.13	0.823846	0.0331557	up	92270	A0A024RAQ7	ATP6AP1L	NP_001336300.1	V-type proton ATPase subunit S1-like protein isoform 1				GO:0030641//regulation of cellular pH;GO:1902600//hydrogen ion transmembrane transport	GO:0046933//proton-transporting ATP synthase activity, rotational mechanism;GO:0046961//proton-transporting ATPase activity, rotational mechanism	GO:0016021//integral component of membrane;GO:0033180//proton-transporting V-type ATPase, V1 domain;GO:0033181//plasma membrane proton-transporting V-type ATPase complex
ENSG00000239388	0.05	0.11	-1.19237	0.041563	down	142686	A6NK59	ASB14	XP_024309123.1	ankyrin repeat and SOCS box protein 14 isoform X1	K10336	ASB14	K10336 ASB14; ankyrin repeat and SOCS box protein 14	GO:0016567//protein ubiquitination;GO:0035556//intracellular signal transduction;GO:0043687//post-translational protein modification	-	GO:0005829//cytosol
ENSG00000117407	0.45	0.24	0.908022	0.0499166	up	9048	Q5T4W7	ARTN	NP_001129687.1	artemin isoform 3				GO:0000165//MAPK cascade;GO:0007165//signal transduction;GO:0007405//neuroblast proliferation;GO:0007411//axon guidance;GO:0007422//peripheral nervous system development;GO:0050930//induction of positive chemotaxis;GO:0061146//Peyer's patch morphogenesis;GO:0097021//lymphocyte migration into lymphoid organs	GO:0005102//receptor binding;GO:0005515//protein binding;GO:0008083//growth factor activity	GO:0005576//extracellular region;GO:0005615//extracellular space
ENSG00000062096	0.02	0	3.53972	0.0217254	up	416	P54793	ARSF	NP_004033.2	arylsulfatase F precursor	K12374	ARSD_F_H	K12374 ARSD_F_H; arylsulfatase D/F/H [EC:3.1.6.-]	-	GO:0004065//arylsulfatase activity;GO:0046872//metal ion binding	GO:0005788//endoplasmic reticulum lumen;GO:0070062//extracellular exosome
ENSG00000120500	0.34	0.7	-1.01869	0.027893	down	407	A0A087WWQ5	ARR3	NP_004303.2	arrestin-C	K13801	ARR3	K13801 ARR3; arrestin-C	GO:0001932//regulation of protein phosphorylation;GO:0002031//G-protein coupled receptor internalization;GO:0007165//signal transduction;GO:0007601//visual perception	GO:0001664//G-protein coupled receptor binding;GO:0002046//opsin binding;GO:0005515//protein binding;GO:0051219//phosphoprotein binding	GO:0001750//photoreceptor outer segment;GO:0001917//photoreceptor inner segment;GO:0005737//cytoplasm;GO:0045202//synapse
ENSG00000196440	0	0	-3.54882	0.0210559	down	100131755	F8W8Y7	ARMCX4	NP_001243084.2	armadillo repeat-containing X-linked protein 4				-	-	GO:0016021//integral component of membrane
ENSG00000165309	0.01	0.07	-2.48696	0.00075295	down	219681	B4DXS3	ARMC3	XP_011517653.1	armadillo repeat-containing protein 3 isoform X7				-	-	GO:0070062//extracellular exosome
ENSG00000114790	0.12	0.23	-0.903033	0.0404511	down	26084	Q96DR7	ARHGEF26	XP_016861649.1	rho guanine nucleotide exchange factor 26 isoform X2	K13744	ARHGEF26	K13744 ARHGEF26; Rho guanine nucleotide exchange factor 26
ENSG00000075884	0.04	0.01	2.24985	0.0170579	up	55843	H7BZM0	ARHGAP15	XP_024308768.1	rho GTPase-activating protein 15 isoform X8	K20637	ARHGAP15	K20637 ARHGAP15; Rho GTPase-activating protein 15	GO:0007165//signal transduction;GO:0008360//regulation of cell shape;GO:0043087//regulation of GTPase activity;GO:0043547//positive regulation of GTPase activity;GO:0051056//regulation of small GTPase mediated signal transduction	GO:0005096//GTPase activator activity	GO:0005737//cytoplasm;GO:0005829//cytosol;GO:0016020//membrane
XLOC_054792	0.39	0.16	1.33605	0.00149425	up	9824	H3BQ41	ARHGAP11A	NP_001273408.1	rho GTPase-activating protein 11A isoform 3	K20635	ARHGAP11	K20635 ARHGAP11; Rho GTPase-activating protein 11
ENSG00000240583	0.03	0.1	-1.6675	0.00981642	down	358	P29972	AQP1	NP_001316801.1	aquaporin-1 isoform 5	K09864	AQP1	K09864 AQP1; aquaporin-1	GO:0003091//renal water homeostasis;GO:0003097//renal water transport;GO:0006813//potassium ion transport;GO:0006833//water transport;GO:0006884//cell volume homeostasis;GO:0006972//hyperosmotic response;GO:0015670//carbon dioxide transport;GO:0015696//ammonium transport;GO:0015701//bicarbonate transport;GO:0015793//glycerol transport;GO:0019725//cellular homeostasis;GO:0019934//cGMP-mediated sig…	GO:0005223//intracellular cGMP activated cation channel activity;GO:0005267//potassium channel activity;GO:0005372//water transmembrane transporter activity;GO:0005515//protein binding;GO:0008519//ammonium transmembrane transporter activity;GO:0015079//potassium ion transmembrane transporter activity;GO:0015168//glycerol transmembrane transporter activity;GO:0015250//water channel activity;GO:002…	GO:0005634//nucleus;GO:0005737//cytoplasm;GO:0005886//plasma membrane;GO:0005887//integral component of plasma membrane;GO:0005903//brush border;GO:0009925//basal plasma membrane;GO:0016021//integral component of membrane;GO:0016323//basolateral plasma membrane;GO:0016324//apical plasma membrane;GO:0020003//symbiont-containing vacuole;GO:0020005//symbiont-containing vacuole membrane;GO:0031526//b…
ENSG00000204444	0.28	0.04	2.71859	0.000553704	up	55937	O95445	APOM	NP_001243098.1	apolipoprotein M isoform 2
ENSG00000128383	0.01	0.06	-2.61719	0.0186054	down	100913187	A0A0K0MJ49	APOBEC3A_B	NP_001180218.1	probable DNA dC->dU-editing enzyme APOBEC-3A	K18750	APOBEC3	K18750 APOBEC3; C->U-editing enzyme APOBEC3 [EC:3.5.4.-]
ENSG00000107282	0	0.02	-2.43316	0.0324405	down	320	A0A0D9SFA9	APBA1	XP_016870159.1	amyloid-beta A4 precursor protein-binding family A member 1 isoform X1	K04531	APBA1	K04531 APBA1; amyloid beta A4 precursor protein-binding family A member 1	GO:0001701//in utero embryonic development;GO:0006886//intracellular protein transport;GO:0007155//cell adhesion;GO:0007268//chemical synaptic transmission;GO:0007269//neurotransmitter secretion;GO:0007399//nervous system development;GO:0007626//locomotory behavior;GO:0008088//axo-dendritic transport;GO:0010468//regulation of gene expression;GO:0014047//glutamate secretion;GO:0014051//gamma-amino…	GO:0001540//beta-amyloid binding;GO:0005515//protein binding	GO:0005634//nucleus;GO:0005737//cytoplasm;GO:0005794//Golgi apparatus;GO:0005829//cytosol;GO:0005886//plasma membrane;GO:0008021//synaptic vesicle;GO:0043197//dendritic spine;GO:0045202//synapse;GO:0048471//perinuclear region of cytoplasm;GO:0048787//presynaptic active zone membrane;GO:0098978//glutamatergic synapse
ENSG00000213983	0	0.01	-3.54922	0.0210434	down	8906	G3V3Z2	AP1G2	XP_016877234.1	AP-1 complex subunit gamma-like 2 isoform X10	K12391	AP1G1	K12391 AP1G1; AP-1 complex subunit gamma-1	GO:0006886//intracellular protein transport;GO:0016032//viral process;GO:0016192//vesicle-mediated transport	GO:0005515//protein binding	GO:0000139//Golgi membrane;GO:0005794//Golgi apparatus;GO:0005798//Golgi-associated vesicle;GO:0010008//endosome membrane;GO:0016020//membrane;GO:0030121//AP-1 adaptor complex;GO:0030133//transport vesicle
ENSG00000131471	0.33	0.6	-0.868961	0.0337024	down	8639	Q16853	AOC3	NP_001264661.1	membrane primary amine oxidase isoform 3	K00276	AOC3	K00276 AOC3; primary-amine oxidase [EC:1.4.3.21]	GO:0006805//xenobiotic metabolic process;GO:0006954//inflammatory response;GO:0007155//cell adhesion;GO:0009308//amine metabolic process;GO:0046677//response to antibiotic;GO:0055114//oxidation-reduction process;GO:1902283//negative regulation of primary amine oxidase activity	GO:0005507//copper ion binding;GO:0005509//calcium ion binding;GO:0005515//protein binding;GO:0008131//primary amine oxidase activity;GO:0042803//protein homodimerization activity;GO:0046982//protein heterodimerization activity;GO:0048038//quinone binding;GO:0052593//tryptamine:oxygen oxidoreductase (deaminating) activity;GO:0052594//aminoacetone:oxygen oxidoreductase(deaminating) activity;GO:005…	GO:0005737//cytoplasm;GO:0005769//early endosome;GO:0005783//endoplasmic reticulum;GO:0005794//Golgi apparatus;GO:0005886//plasma membrane;GO:0005902//microvillus;GO:0009986//cell surface;GO:0016021//integral component of membrane
ENSG00000002726	0.21	0.08	1.37187	0.00685841	up	26	C9J2J4	AOC1	NP_001082.2	amiloride-sensitive amine oxidase	K11182	AOC1	K11182 AOC1; diamine oxidase [EC:1.4.3.22]	GO:0006805//xenobiotic metabolic process;GO:0009308//amine metabolic process;GO:0035874//cellular response to copper ion starvation;GO:0042493//response to drug;GO:0043312//neutrophil degranulation;GO:0046677//response to antibiotic;GO:0055114//oxidation-reduction process;GO:0071280//cellular response to copper ion;GO:0071420//cellular response to histamine;GO:0071504//cellular response to hepari…	GO:0005507//copper ion binding;GO:0005509//calcium ion binding;GO:0008131//primary amine oxidase activity;GO:0008144//drug binding;GO:0008201//heparin binding;GO:0008270//zinc ion binding;GO:0042803//protein homodimerization activity;GO:0044877//macromolecular complex binding;GO:0048038//quinone binding;GO:0052597//diamine oxidase activity;GO:0052598//histamine oxidase activity;GO:0052599//methyl…	GO:0005576//extracellular region;GO:0005615//extracellular space;GO:0005777//peroxisome;GO:0005886//plasma membrane;GO:0005923//bicellular tight junction;GO:0035580//specific granule lumen;GO:0070062//extracellular exosome
ENSG00000167117	0.02	0	4.08165	0.00543808	up	55018	A0A2R8Y365	ANKRD40CL	XP_024306585.1	putative ANKRD40 C-terminal-like protein isoform X1
ENSG00000235711	0	0.01	-3.5498	0.0210248	down	390616	P0C6C1	ANKRD34C	NP_001139813.1	ankyrin repeat domain-containing protein 34C
ENSG00000152766	0	0.01	-3.54922	0.0210434	down	118932	Q5VYY1	ANKRD22	NP_653191.2	ankyrin repeat domain-containing protein 22
ENSG00000172014	0	0.02	-4.3027	0.00267308	down	728747	Q4UJ75	ANKRD20A4	NP_001092275.1	ankyrin repeat domain-containing protein 20A4
ENSG00000189045	0.1	0.04	1.30861	0.041961	up	728780	A6NHY2	ANKDD1B	XP_016865303.1	ankyrin repeat and death domain-containing protein 1B isoform X1				GO:0007165//signal transduction	-	-
ENSG00000151150	0.01	0.02	-1.32884	0.0388205	down	288	D6RHY3	ANK3	XP_024303730.1	ankyrin-3 isoform X18	K10380	ANK	K10380 ANK; ankyrin	GO:0000281//mitotic cytokinesis;GO:0006888//ER to Golgi vesicle-mediated transport;GO:0007009//plasma membrane organization;GO:0007016//cytoskeletal anchoring at plasma membrane;GO:0007165//signal transduction;GO:0007409//axonogenesis;GO:0007528//neuromuscular junction development;GO:0010628//positive regulation of gene expression;GO:0010650//positive regulation of cell communication by electrica…	GO:0005200//structural constituent of cytoskeleton;GO:0005515//protein binding;GO:0008092//cytoskeletal protein binding;GO:0030507//spectrin binding;GO:0030674//protein binding, bridging;GO:0044325//ion channel binding;GO:0045296//cadherin binding	GO:0005764//lysosome;GO:0005783//endoplasmic reticulum;GO:0005794//Golgi apparatus;GO:0005829//cytosol;GO:0005886//plasma membrane;GO:0005923//bicellular tight junction;GO:0009925//basal plasma membrane;GO:0009986//cell surface;GO:0014704//intercalated disc;GO:0014731//spectrin-associated cytoskeleton;GO:0016020//membrane;GO:0016323//basolateral plasma membrane;GO:0016328//lateral plasma membrane…
ENSG00000166126	0.23	0.47	-1.01783	0.020762	down	81693	H0YKJ5	AMN	XP_011535504.1	protein amnionless isoform X2	K18259	AMN	K18259 AMN; protein amnionless	GO:0006898//receptor-mediated endocytosis;GO:0007275//multicellular organism development;GO:0007588//excretion;GO:0009235//cobalamin metabolic process;GO:0015889//cobalamin transport;GO:0034384//high-density lipoprotein particle clearance;GO:0043001//Golgi to plasma membrane protein transport	GO:0005102//receptor binding	GO:0005615//extracellular space;GO:0005886//plasma membrane;GO:0005905//clathrin-coated pit;GO:0010008//endosome membrane;GO:0016021//integral component of membrane;GO:0016324//apical plasma membrane;GO:0030139//endocytic vesicle;GO:0031526//brush border membrane;GO:0032991//macromolecular complex;GO:0070062//extracellular exosome
ENSG00000179593	0.06	0.01	1.80264	0.0228292	up	247	O15296	ALOX15B	NP_001132.2	arachidonate 15-lipoxygenase B isoform d	K08022	ALOX15B	K08022 ALOX15B; arachidonate 15-lipoxygenase (second type) / 8-lipoxygenase (S-type) [EC:1.13.11.33 1.13.11.-]	GO:0006629//lipid metabolic process;GO:0006915//apoptotic process;GO:0008285//negative regulation of cell proliferation;GO:0010744//positive regulation of macrophage derived foam cell differentiation;GO:0019369//arachidonic acid metabolic process;GO:0019372//lipoxygenase pathway;GO:0030336//negative regulation of cell migration;GO:0030850//prostate gland development;GO:0030856//regulation of epit…	GO:0005506//iron ion binding;GO:0005509//calcium ion binding;GO:0008289//lipid binding;GO:0016165//linoleate 13S-lipoxygenase activity;GO:0036403//arachidonate 8(S)-lipoxygenase activity;GO:0050473//arachidonate 15-lipoxygenase activity	GO:0005634//nucleus;GO:0005829//cytosol;GO:0005856//cytoskeleton;GO:0005886//plasma membrane;GO:0016020//membrane;GO:0019898//extrinsic component of membrane;GO:0070062//extracellular exosome
ENSG00000128918	0.04	0.11	-1.37195	0.0173618	down	8854	O94788	ALDH1A2	NP_733798.1	retinal dehydrogenase 2 isoform 3	K07249	ALDH1A	K07249 ALDH1A; retinal dehydrogenase [EC:1.2.1.36]	GO:0001568//blood vessel development;GO:0001822//kidney development;GO:0001889//liver development;GO:0001936//regulation of endothelial cell proliferation;GO:0002138//retinoic acid biosynthetic process;GO:0003007//heart morphogenesis;GO:0006776//vitamin A metabolic process;GO:0007494//midgut development;GO:0008284//positive regulation of cell proliferation;GO:0008285//negative regulation of cell …	GO:0001758//retinal dehydrogenase activity;GO:0004028//3-chloroallyl aldehyde dehydrogenase activity;GO:0004029//aldehyde dehydrogenase (NAD) activity;GO:0016918//retinal binding	GO:0005737//cytoplasm;GO:0005829//cytosol;GO:0048471//perinuclear region of cytoplasm
ENSG00000158578	0.22	0.09	1.27236	0.0228227	up	212	A0A2R8Y782	ALAS2	NP_001033057.1	5-aminolevulinate synthase, erythroid-specific, mitochondrial isoform c precursor	K00643	E2.3.1.37	K00643 E2.3.1.37; 5-aminolevulinate synthase [EC:2.3.1.37]	GO:0001666//response to hypoxia;GO:0006782//protoporphyrinogen IX biosynthetic process;GO:0006783//heme biosynthetic process;GO:0006879//cellular iron ion homeostasis;GO:0030218//erythrocyte differentiation;GO:0032364//oxygen homeostasis;GO:0042541//hemoglobin biosynthetic process	GO:0003870//5-aminolevulinate synthase activity;GO:0005515//protein binding;GO:0016594//glycine binding;GO:0030170//pyridoxal phosphate binding;GO:0050662//coenzyme binding	GO:0005739//mitochondrion;GO:0005743//mitochondrial inner membrane;GO:0005759//mitochondrial matrix
ENSG00000117020	0	0.01	-3.54931	0.0210404	down	10000	Q9Y243	AKT3	XP_024303706.1	RAC-gamma serine/threonine-protein kinase isoform X6	K04456	AKT	K04456 AKT; RAC serine/threonine-protein kinase [EC:2.7.11.1]
ENSG00000151632	2.24	1.24	0.857432	0.0260431	up	1646	P52895	AKR1C2	NP_001128713.1	aldo-keto reductase family 1 member C2 isoform 2	K00089	AKR1C2	K00089 AKR1C2; 3alpha-hydroxysteroid 3-dehydrogenase [EC:1.1.1.213 1.1.1.357]	GO:0006693//prostaglandin metabolic process;GO:0007186//G-protein coupled receptor signaling pathway;GO:0007586//digestion;GO:0008202//steroid metabolic process;GO:0008284//positive regulation of cell proliferation;GO:0030855//epithelial cell differentiation;GO:0042448//progesterone metabolic process;GO:0044597//daunorubicin metabolic process;GO:0044598//doxorubicin metabolic process;GO:0051897//…	GO:0004032//alditol:NADP+ 1-oxidoreductase activity;GO:0008106//alcohol dehydrogenase (NADP+) activity;GO:0016229//steroid dehydrogenase activity;GO:0016491//oxidoreductase activity;GO:0016655//oxidoreductase activity, acting on NAD(P)H, quinone or similar compound as acceptor;GO:0018636//phenanthrene 9,10-monooxygenase activity;GO:0031406//carboxylic acid binding;GO:0032052//bile acid binding;GO…	GO:0005829//cytosol
ENSG00000113492	0	0.04	-4.48545	0.00140739	down	64902	Q9BYV1	AGXT2	NP_001293102.1	alanine--glyoxylate aminotransferase 2, mitochondrial isoform b precursor	K00827	AGXT2	K00827 AGXT2; alanine-glyoxylate transaminase / (R)-3-amino-2-methylpropionate-pyruvate transaminase [EC:2.6.1.44 2.6.1.40]	GO:0009436//glyoxylate catabolic process;GO:0019265//glycine biosynthetic process, by transamination of glyoxylate;GO:0019481//L-alanine catabolic process, by transamination;GO:0045429//positive regulation of nitric oxide biosynthetic process;GO:0046487//glyoxylate metabolic process	GO:0008453//alanine-glyoxylate transaminase activity;GO:0030170//pyridoxal phosphate binding;GO:0047305//(R)-3-amino-2-methylpropionate-pyruvate transaminase activity	GO:0005739//mitochondrion;GO:0005759//mitochondrial matrix
XLOC_054719	0.21	0.38	-0.863493	0.0365636	down	55326	H0YAW1	AGPAT5	XP_011533053.1	1-acyl-sn-glycerol-3-phosphate acyltransferase epsilon isoform X1	K19007	AGPAT5	K19007 AGPAT5; lysophosphatidiate acyltransferase [EC:2.3.1.51]
ENSG00000144218	0.01	0	2.4135	0.0340961	up	3899	P51826	AFF3	NP_001020279.1	AF4/FMR2 family member 3 isoform 2	K15195	AFF3	K15195 AFF3; AF4/FMR2 family member 3	GO:0006355//regulation of transcription, DNA-templated;GO:0034612//response to tumor necrosis factor;GO:0035116//embryonic hindlimb morphogenesis	GO:0003690//double-stranded DNA binding;GO:0003700//transcription factor activity, sequence-specific DNA binding	GO:0005634//nucleus;GO:0005654//nucleoplasm;GO:0005829//cytosol;GO:0008023//transcription elongation factor complex;GO:0016604//nuclear body;GO:0032783//ELL-EAF complex
ENSG00000185100	1.1	2.49	-1.18175	0.00258128	down	122622	G3V232	ADSSL1	NP_001307353.1	adenylosuccinate synthetase isozyme 1 isoform 3	K01939	purA	K01939 purA; adenylosuccinate synthase [EC:6.3.4.4]	GO:0002376//immune system process;GO:0006167//AMP biosynthetic process;GO:0006531//aspartate metabolic process;GO:0006541//glutamine metabolic process;GO:0009168//purine ribonucleoside monophosphate biosynthetic process;GO:0014850//response to muscle activity;GO:0035690//cellular response to drug;GO:0042594//response to starvation;GO:0044208//'de novo' AMP biosynthetic process;GO:0046040//IMP met…	GO:0000287//magnesium ion binding;GO:0003924//GTPase activity;GO:0004019//adenylosuccinate synthase activity;GO:0005525//GTP binding;GO:0042301//phosphate ion binding;GO:0042803//protein homodimerization activity;GO:0051015//actin filament binding	GO:0005737//cytoplasm;GO:0005829//cytosol
ENSG00000120907	0.03	0	2.4145	0.0340226	up	148	P35348	ADRA1A	XP_011542713.1	alpha-1A adrenergic receptor isoform X3	K04135	ADRA1A	K04135 ADRA1A; adrenergic receptor alpha-1A	GO:0001985//negative regulation of heart rate involved in baroreceptor response to increased systemic arterial blood pressure;GO:0001994//norepinephrine-epinephrine vasoconstriction involved in regulation of systemic arterial blood pressure;GO:0001996//positive regulation of heart rate by epinephrine-norepinephrine;GO:0001997//positive regulation of the force of heart contraction by epinephrine-n…	GO:0004935//adrenergic receptor activity;GO:0004937//alpha1-adrenergic receptor activity;GO:0005515//protein binding;GO:0046982//protein heterodimerization activity	GO:0005634//nucleus;GO:0005737//cytoplasm;GO:0005886//plasma membrane;GO:0005887//integral component of plasma membrane;GO:0005901//caveola;GO:0030018//Z disc;GO:0030315//T-tubule;GO:0031965//nuclear membrane;GO:0098978//glutamatergic synapse;GO:0098982//GABA-ergic synapse;GO:0099055//integral component of postsynaptic membrane;GO:0099056//integral component of presynaptic membrane
ENSG00000144820	0	0.01	-3.54843	0.0210685	down	84873	E9PHI0	ADGRG7	NP_001295291.1	adhesion G-protein coupled receptor G7 isoform 2 precursor	K08464	ADGRG7	K08464 ADGRG7; adhesion G-protein coupled receptor G7	GO:0007166//cell surface receptor signaling pathway;GO:0007186//G-protein coupled receptor signaling pathway;GO:0007189//adenylate cyclase-activating G-protein coupled receptor signaling pathway	GO:0004930//G-protein coupled receptor activity;GO:0005515//protein binding	GO:0005887//integral component of plasma membrane;GO:0016021//integral component of membrane
ENSG00000178031	0.04	0.07	-1.05813	0.0388976	down	92949	H7BYE3	ADAMTSL1	XP_011516372.1	ADAMTS-like protein 1 isoform X9				GO:0006508//proteolysis	GO:0008233//peptidase activity	GO:0005576//extracellular region;GO:0005788//endoplasmic reticulum lumen
ENSG00000151388	0.02	0	2.37164	0.0107348	up	81792	D6REX0	ADAMTS12	NP_001311440.1	A disintegrin and metalloproteinase with thrombospondin motifs 12 isoform 2 precursor	K08626	ADAMTS12	K08626 ADAMTS12; a disintegrin and metalloproteinase with thrombospondin motifs 12 [EC:3.4.24.-]	GO:0007160//cell-matrix adhesion;GO:0016477//cell migration;GO:0030167//proteoglycan catabolic process;GO:0032331//negative regulation of chondrocyte differentiation;GO:0050727//regulation of inflammatory response;GO:0051603//proteolysis involved in cellular protein catabolic process;GO:0071347//cellular response to interleukin-1;GO:0071356//cellular response to tumor necrosis factor;GO:0071773//…	GO:0004222//metalloendopeptidase activity;GO:0005515//protein binding;GO:0046872//metal ion binding	GO:0005576//extracellular region
ENSG00000139567	0.08	0.02	1.9325	0.00317591	up	94	H3BTZ2	ACVRL1	XP_024305047.1	serine/threonine-protein kinase receptor R3 isoform X3	K13594	ACVRL1	K13594 ACVRL1; activin receptor-like kinase 1 [EC:2.7.11.30]	GO:0001525//angiogenesis;GO:0001666//response to hypoxia;GO:0001701//in utero embryonic development;GO:0001936//regulation of endothelial cell proliferation;GO:0001937//negative regulation of endothelial cell proliferation;GO:0001938//positive regulation of endothelial cell proliferation;GO:0001946//lymphangiogenesis;GO:0001955//blood vessel maturation;GO:0001974//blood vessel remodeling;GO:00020…	GO:0004674//protein serine/threonine kinase activity;GO:0004675//transmembrane receptor protein serine/threonine kinase activity;GO:0005024//transforming growth factor beta-activated receptor activity;GO:0005025//transforming growth factor beta receptor activity, type I;GO:0005515//protein binding;GO:0005524//ATP binding;GO:0016361//activin receptor activity, type I;GO:0019838//growth factor bind…	GO:0005886//plasma membrane;GO:0005887//integral component of plasma membrane;GO:0009986//cell surface;GO:0030425//dendrite;GO:0043025//neuronal cell body;GO:0043235//receptor complex;GO:0048179//activin receptor complex
ENSG00000130402	0	0.01	-3.5502	0.0210123	down	81	F5GXS2	ACTN4	XP_016882820.1	alpha-actinin-4 isoform X3	K05699	ACTN1_4	K05699 ACTN1_4; actinin alpha 1/4
ENSG00000248746	0	0.02	-3.84635	0.0103051	down	89	D6RH00	ACTN3	NP_001095.2	alpha-actinin-3 isoform 1	K21073	ACTN2_3	K21073 ACTN2_3; actinin alpha 2/3	GO:0014728//regulation of the force of skeletal muscle contraction;GO:0014732//skeletal muscle atrophy;GO:0014883//transition between fast and slow fiber;GO:0014894//response to denervation involved in regulation of muscle adaptation;GO:0030049//muscle filament sliding;GO:0042981//regulation of apoptotic process;GO:0045820//negative regulation of glycolytic process;GO:0048041//focal adhesion asse…	GO:0003779//actin binding;GO:0005178//integrin binding;GO:0005509//calcium ion binding;GO:0005515//protein binding;GO:0008307//structural constituent of muscle;GO:0042803//protein homodimerization activity;GO:0044325//ion channel binding	GO:0005829//cytosol;GO:0005884//actin filament;GO:0005925//focal adhesion;GO:0031143//pseudopodium;GO:0070062//extracellular exosome
ENSG00000103740	0.02	0.05	-1.76992	0.00566078	down	23205	H0YMZ0	ACSBG1	NP_055977.3	long-chain-fatty-acid--CoA ligase ACSBG1 isoform 1	K15013	ACSBG	K15013 ACSBG; long-chain-fatty-acid--CoA ligase ACSBG [EC:6.2.1.3]	GO:0000038//very long-chain fatty acid metabolic process;GO:0001676//long-chain fatty acid metabolic process;GO:0035338//long-chain fatty-acyl-CoA biosynthetic process;GO:0042552//myelination;GO:0051384//response to glucocorticoid	GO:0003996//acyl-CoA ligase activity;GO:0004467//long-chain fatty acid-CoA ligase activity;GO:0005524//ATP binding;GO:0031957//very long-chain fatty acid-CoA ligase activity;GO:0102391//decanoate--CoA ligase activity	GO:0005737//cytoplasm;GO:0005783//endoplasmic reticulum;GO:0005829//cytosol;GO:0005886//plasma membrane;GO:0031410//cytoplasmic vesicle
ENSG00000134940	0.23	0.45	-0.969883	0.0331456	down	56	P26436	ACRV1	NP_064492.1	acrosomal protein SP-10 isoform c precursor				GO:0007275//multicellular organism development	-	GO:0001669//acrosomal vesicle
ENSG00000157766	0	0.01	-3.84674	0.0102979	down	176	A0A087X1T7	ACAN	NP_001356197.1	aggrecan core protein isoform 3 precursor	K06792	AGC1	K06792 AGC1; aggrecan 1	GO:0001501//skeletal system development;GO:0001502//cartilage condensation;GO:0002063//chondrocyte development;GO:0006508//proteolysis;GO:0007155//cell adhesion;GO:0007417//central nervous system development;GO:0007507//heart development;GO:0018146//keratan sulfate biosynthetic process;GO:0030166//proteoglycan biosynthetic process;GO:0030198//extracellular matrix organization;GO:0030199//collagen…	GO:0005201//extracellular matrix structural constituent;GO:0005515//protein binding;GO:0005540//hyaluronic acid binding;GO:0030021//extracellular matrix structural constituent conferring compression resistance;GO:0030246//carbohydrate binding;GO:0046872//metal ion binding	GO:0005576//extracellular region;GO:0005604//basement membrane;GO:0005796//Golgi lumen;GO:0031012//extracellular matrix;GO:0043202//lysosomal lumen;GO:0098966//perisynaptic extracellular matrix;GO:0098978//glutamatergic synapse;GO:0098982//GABA-ergic synapse
XLOC_055309	0.53	0.1	2.34733	2.27865e-06	up	23	H0YGW7	ABCF1	NP_001020262.1	ATP-binding cassette sub-family F member 1 isoform a	K06184	ABCF1	K06184 ABCF1; ATP-binding cassette, subfamily F, member 1
XLOC_055169	0.19	0.03	2.57792	7.10346e-05	up	23	H0YGW7	ABCF1	NP_001020262.1	ATP-binding cassette sub-family F member 1 isoform a	K06184	ABCF1	K06184 ABCF1; ATP-binding cassette, subfamily F, member 1
ENSG00000118017	0.01	0.07	-2.13943	0.0254432	down	51146	Q9UNA3	A4GNT	XP_016862032.1	alpha-1,4-N-acetylglucosaminyltransferase isoform X1	K08251	A4GNT	K08251 A4GNT; alpha 1,4-N-acetylglucosaminyltransferase [EC:2.4.1.-]	GO:0005975//carbohydrate metabolic process;GO:0006493//protein O-linked glycosylation;GO:0009101//glycoprotein biosynthetic process;GO:0016266//O-glycan processing;GO:0050680//negative regulation of epithelial cell proliferation	GO:0008375//acetylglucosaminyltransferase activity	GO:0000139//Golgi membrane;GO:0016020//membrane;GO:0016021//integral component of membrane
ENSG00000283392	0	0.08	-4.92876	0.000224646	down
ENSG00000287652	0	0.24	-4.92753	0.000225609	down
ENSG00000237883	0	0.12	-4.64889	0.000751409	down
ENSG00000236869	0	0.23	-4.64786	0.000753707	down
ENSG00000232460	0	0.09	-4.48712	0.0014011	down
ENSG00000269994	0	0.04	-4.48562	0.00140675	down
ENSG00000245954	0	0.05	-4.3045	0.00266151	down
ENSG00000282882	0	0.05	-4.30414	0.00266384	down
ENSG00000287715	0	0.03	-4.30341	0.0026685	down
ENSG00000259010	0	0.06	-4.30324	0.00266962	down
ENSG00000285216	0	0.09	-4.30315	0.00267018	down
ENSG00000234936	0	0.21	-4.30279	0.00267252	down
ENSG00000215480	0	0.09	-4.3017	0.00267953	down
ENSG00000286148	0	0.26	-4.30161	0.00268009	down
ENSG00000234556	0	0.11	-4.30125	0.00268244	down
ENSG00000260370	0	0.2	-4.09477	0.00516361	down
ENSG00000265394	0	0.18	-4.09338	0.00517884	down
ENSG00000280683	0	0.04	-4.09255	0.00518802	down
ENSG00000285283	0	0.06	-4.09255	0.00518802	down		E9PP27							-	GO:0005509//calcium ion binding	-
ENSG00000236039	0	0.03	-4.09246	0.005189	down
ENSG00000284619	0	0.33	-4.09246	0.005189	down
ENSG00000228040	0	0.45	-4.09189	0.00519524	down
ENSG00000235308	0	0.15	-4.09171	0.00519721	down
ENSG00000287654	0	0.13	-4.09171	0.00519721	down
ENSG00000253166	0	0.42	-4.09097	0.00520543	down
ENSG00000254028	0	0.07	-3.84864	0.0102623	down
ENSG00000243572	0	0.12	-3.84816	0.0102712	down
ENSG00000214837	0	0.02	-3.84769	0.0102801	down
ENSG00000232387	0	0.15	-3.84731	0.0102873	down
ENSG00000231725	0	0.06	-3.84692	0.0102945	down
ENSG00000242775	0	0.15	-3.84692	0.0102945	down
ENSG00000229847	0	0.01	-3.84674	0.0102979	down
ENSG00000232835	0	0.18	-3.84674	0.0102979	down
ENSG00000233870	0	0.31	-3.84674	0.0102979	down
ENSG00000234112	0	0.19	-3.84674	0.0102979	down
ENSG00000254587	0	0.03	-3.84674	0.0102979	down
ENSG00000265717	0	0.1	-3.84674	0.0102979	down
ENSG00000268521	0	0.13	-3.84635	0.0103051	down
ENSG00000286285	0	0.01	-3.84626	0.0103068	down
ENSG00000216863	0	0.02	-3.84597	0.0103123	down
ENSG00000257390	0	0.03	-3.84597	0.0103123	down		H0YIP3							-	GO:0005515//protein binding	GO:0016607//nuclear speck;GO:0036464//cytoplasmic ribonucleoprotein granule
ENSG00000230275	0	0.05	-3.84588	0.010314	down
ENSG00000237740	0	0.04	-3.84588	0.010314	down
ENSG00000249409	0	0.11	-3.84588	0.010314	down
ENSG00000250751	0	0.1	-3.84588	0.010314	down
ENSG00000286274	0	0.02	-3.84588	0.010314	down
ENSG00000286841	0	0.06	-3.84588	0.010314	down
ENSG00000238021	0	0.08	-3.84559	0.0103195	down
ENSG00000244515	0	0.04	-3.8455	0.0103212	down
ENSG00000250046	0	0.08	-3.8455	0.0103212	down
ENSG00000273496	0	0.04	-3.8455	0.0103212	down
ENSG00000286915	0	0.06	-3.8455	0.0103212	down
ENSG00000233978	0	0.1	-3.84521	0.0103267	down
ENSG00000287084	0	0.01	-3.84521	0.0103267	down
ENSG00000234015	0	0.06	-3.84473	0.0103357	down
ENSG00000284694	0	0.02	-3.84473	0.0103357	down
ENSG00000266368	0	0.12	-3.84435	0.0103429	down
ENSG00000235338	0.01	0.19	-3.66668	0.00018295	down
ENSG00000225018	0	0.16	-3.55117	0.0209812	down
ENSG00000249639	0	0.09	-3.55117	0.0209812	down
ENSG00000267289	0	0.06	-3.55117	0.0209812	down
ENSG00000278130	0	0.05	-3.55117	0.0209812	down
ENSG00000282080	0	0.08	-3.55117	0.0209812	down
ENSG00000276118	0	0.49	-3.55029	0.0210093	down
ENSG00000250770	0	0.01	-3.5498	0.0210248	down
ENSG00000260494	0	0.06	-3.54971	0.0210278	down
ENSG00000283051	0	0.09	-3.54971	0.0210278	down
ENSG00000214855	0	0.07	-3.54931	0.0210404	down	342
ENSG00000231724	0	0.09	-3.54931	0.0210404	down
ENSG00000254777	0	0.05	-3.54931	0.0210404	down
ENSG00000257507	0	0.11	-3.54931	0.0210404	down
ENSG00000214815	0	0.03	-3.54922	0.0210434	down
ENSG00000227531	0	0.06	-3.54922	0.0210434	down
ENSG00000229205	0	0.02	-3.54922	0.0210434	down
ENSG00000233146	0	0.04	-3.54922	0.0210434	down
ENSG00000237480	0	0.02	-3.54922	0.0210434	down
ENSG00000249036	0	0.08	-3.54922	0.0210434	down
ENSG00000256226	0	0.12	-3.54922	0.0210434	down
ENSG00000260679	0	0.16	-3.54922	0.0210434	down
ENSG00000260710	0	0.15	-3.54922	0.0210434	down
ENSG00000261231	0	0.02	-3.54922	0.0210434	down
ENSG00000270302	0	0.11	-3.54922	0.0210434	down
ENSG00000277981	0	0.06	-3.54922	0.0210434	down
ENSG00000234042	0	0.07	-3.54892	0.0210529	down
ENSG00000240915	0	0.08	-3.54892	0.0210529	down
ENSG00000254560	0	0.05	-3.54892	0.0210529	down
ENSG00000279124	0	0.02	-3.54892	0.0210529	down
ENSG00000214381	0	0.02	-3.54882	0.0210559	down
ENSG00000229133	0	0.08	-3.54882	0.0210559	down
ENSG00000237585	0	0.16	-3.54882	0.0210559	down
ENSG00000237749	0	0.18	-3.54882	0.0210559	down
ENSG00000212856	0	0.01	-3.54843	0.0210685	down
ENSG00000234232	0	0.03	-3.54843	0.0210685	down
ENSG00000285854	0	0.01	-3.54843	0.0210685	down		A0A3B3IS95
ENSG00000235486	0	0.05	-3.54804	0.0210811	down
ENSG00000285869	0	0.03	-3.54804	0.0210811	down
ENSG00000287554	0	0.01	-3.54804	0.0210811	down
ENSG00000186842	0	0.03	-3.54764	0.0210937	down
ENSG00000187870	0	0.04	-3.54764	0.0210937	down
ENSG00000233786	0	0.06	-3.54764	0.0210937	down
ENSG00000235296	0	0.07	-3.54764	0.0210937	down
ENSG00000236864	0	0.3	-3.54764	0.0210937	down
ENSG00000239473	0	0.06	-3.54764	0.0210937	down
ENSG00000249782	0	0.04	-3.54764	0.0210937	down	105374647
ENSG00000250566	0	0.05	-3.54764	0.0210937	down
ENSG00000259245	0	0.05	-3.54764	0.0210937	down
ENSG00000273639	0	0.08	-3.54764	0.0210937	down
ENSG00000237153	0.01	0.07	-3.29069	0.00131727	down
ENSG00000236527	0.02	0.26	-3.17802	0.00220788	down
ENSG00000235916	0.03	0.3	-3.05872	0.00369536	down
ENSG00000231073	0.03	0.32	-2.92567	0.00628957	down
ENSG00000223459	0.04	0.33	-2.9171	7.35643e-07	down
ENSG00000230445	0	0.02	-2.77912	0.0107905	down
ENSG00000230612	0.01	0.13	-2.77852	0.0108078	down
ENSG00000286918	0.01	0.06	-2.77689	0.0108559	down
ENSG00000213386	0.02	0.14	-2.77596	0.0108832	down
ENSG00000230133	0.01	0.07	-2.73707	0.000501502	down
ENSG00000240270	0.05	0.35	-2.70667	0.00250261	down
ENSG00000260796	0.04	0.32	-2.70452	0.00252366	down
ENSG00000226666	0.04	0.27	-2.69412	1.28734e-05	down
ENSG00000263212	0.02	0.18	-2.61827	0.0185564	down
ENSG00000235045	0.02	0.13	-2.61543	0.0186853	down
ENSG00000249807	0.01	0.1	-2.61543	0.0186853	down
ENSG00000250753	0.03	0.26	-2.61528	0.0186925	down
ENSG00000286558	0.01	0.06	-2.61501	0.0187047	down
ENSG00000223873	0.03	0.2	-2.61438	0.0187338	down
ENSG00000228527	0.04	0.28	-2.61367	0.0187661	down
ENSG00000261239	0.01	0.04	-2.60515	0.00401344	down
ENSG00000270020	0.01	0.09	-2.6004	0.000367909	down
ENSG00000230863	0.03	0.2	-2.54377	0.000528471	down
ENSG00000280029	0.05	0.29	-2.5297	0.001648	down
ENSG00000286271	0.01	0.08	-2.50396	0.00629115	down
ENSG00000266707	0.04	0.28	-2.50224	0.00632835	down
ENSG00000242593	0.01	0.05	-2.46046	0.000374287	down
ENSG00000230929	0.11	0.69	-2.4543	0.00245703	down
ENSG00000169253	0.04	0.26	-2.43443	0.0323512	down
ENSG00000259416	0.01	0.1	-2.43422	0.0323661	down
ENSG00000255042	0.01	0.08	-2.43278	0.0324674	down
ENSG00000227917	0.01	0.05	-2.43235	0.0324976	down
ENSG00000253607	0.02	0.13	-2.43182	0.0325356	down
ENSG00000257327	0.02	0.12	-2.43173	0.0325417	down
ENSG00000276136	0.01	0.1	-2.43145	0.0325615	down
ENSG00000283321	0	0.02	-2.43109	0.0325869	down		A0A1B0GVI7							GO:0006805//xenobiotic metabolic process;GO:0009410//response to xenobiotic stimulus;GO:0045944//positive regulation of transcription from RNA polymerase II promoter	GO:0003700//transcription factor activity, sequence-specific DNA binding;GO:0046983//protein dimerization activity	GO:0005634//nucleus;GO:0034751//aryl hydrocarbon receptor complex
ENSG00000233930	0.01	0.04	-2.43081	0.0326067	down
ENSG00000230702	0.03	0.22	-2.43052	0.0326275	down
ENSG00000119660	0.03	0.22	-2.43028	0.0326444	down
ENSG00000265639	0.01	0.1	-2.42964	0.0326899	down
ENSG00000234146	0.04	0.2	-2.42666	0.00108176	down
ENSG00000207205	0.14	0.85	-2.39227	0.00999228	down
ENSG00000226435	0.01	0.05	-2.39187	0.0100051	down
ENSG00000257809	0.04	0.26	-2.39109	0.01003	down
ENSG00000250490	0.01	0.08	-2.37597	0.003656	down
ENSG00000266088	0.03	0.19	-2.37405	0.00368463	down
ENSG00000255559	0.02	0.11	-2.3113	0.000501022	down
ENSG00000262585	0.01	0.04	-2.29974	0.00223138	down
ENSG00000270127	0.05	0.24	-2.28975	7.57042e-05	down
ENSG00000272948	0.05	0.26	-2.2889	0.0055449	down
ENSG00000240497	0.03	0.14	-2.28831	0.00555744	down
ENSG00000231133	0.01	0.05	-2.2854	0.00561988	down
ENSG00000247372	0.05	0.24	-2.26992	0.0159893	down
ENSG00000250765	0.03	0.18	-2.26928	0.0160194	down
ENSG00000239881	0.05	0.26	-2.26912	0.016027	down
ENSG00000254409	0.03	0.17	-2.26837	0.0160626	down
ENSG00000228679	0.04	0.21	-2.19772	0.00838629	down
ENSG00000261717	0.07	0.33	-2.19712	0.00840465	down		H3BUV5							-	-	GO:0016021//integral component of membrane
ENSG00000232412	0.14	0.68	-2.1587	0.0046802	down
ENSG00000248697	0.01	0.06	-2.13969	0.0254256	down
ENSG00000233920	0.03	0.13	-2.13735	0.0255874	down
ENSG00000205822	0.02	0.09	-2.13727	0.025593	down
ENSG00000254057	0.05	0.22	-2.13727	0.025593	down
ENSG00000206674	0.21	1.09	-2.13693	0.0256163	down
ENSG00000254468	0.03	0.16	-2.13683	0.0256235	down
ENSG00000272864	0.04	0.2	-2.13567	0.025704	down
ENSG00000229029	0.04	0.19	-2.13559	0.0257096	down
ENSG00000279332	0.06	0.32	-2.13552	0.0257145	down
ENSG00000227193	0.05	0.23	-2.13543	0.0257209	down
ENSG00000249635	0.03	0.13	-2.1164	0.000436127	down
ENSG00000272862	0.07	0.33	-2.1026	0.0126154	down
ENSG00000242837	0.07	0.34	-2.1013	0.0126713	down
ENSG00000236349	0.03	0.13	-2.09826	0.0128031	down
ENSG00000250137	0.08	0.37	-2.07874	0.00690393	down
ENSG00000233154	0.08	0.33	-2.0679	0.00396475	down
ENSG00000248975	0.07	0.31	-2.00146	0.0033724	down
ENSG00000261096	0.01	0.06	-1.9945	0.0193889	down
ENSG00000258179	0.09	0.4	-1.99234	0.0409398	down
ENSG00000235538	0.01	0.04	-1.99226	0.0409481	down
ENSG00000272154	0.04	0.17	-1.99191	0.0409828	down
ENSG00000181355	0.01	0.03	-1.99091	0.0410842	down
ENSG00000228050	0.02	0.08	-1.99088	0.0410872	down
ENSG00000254226	0.01	0.03	-1.99071	0.0411037	down
ENSG00000286847	0.01	0.05	-1.99029	0.0411469	down	105375216
ENSG00000222004	0.01	0.05	-1.99028	0.0411471	down	285941
ENSG00000232000	0	0.01	-1.98971	0.0412054	down
ENSG00000249849	0.05	0.24	-1.9896	0.0412167	down
ENSG00000241293	0.01	0.07	-1.98945	0.0412315	down
ENSG00000254224	0.01	0.07	-1.98891	0.0412864	down
ENSG00000279859	0.03	0.11	-1.98856	0.0413213	down
ENSG00000213590	0.02	0.08	-1.98815	0.0413631	down
ENSG00000248213	0.04	0.18	-1.97414	0.000617208	down
ENSG00000243069	0.03	0.12	-1.95378	0.0028429	down
ENSG00000284879	0.03	0.1	-1.91837	0.00239164	down
ENSG00000258969	0.06	0.25	-1.91499	0.0145135	down
ENSG00000287629	0.01	0.04	-1.91273	0.0146316	down
ENSG00000229212	0.09	0.33	-1.90079	0.000273442	down
ENSG00000285728	0.02	0.07	-1.88635	0.029075	down
ENSG00000237169	0.07	0.28	-1.88435	0.0292471	down
ENSG00000259692	0.02	0.07	-1.88421	0.0292589	down
ENSG00000265460	0.04	0.14	-1.88397	0.0292797	down
ENSG00000274642	0.04	0.16	-1.88315	0.0293498	down
ENSG00000254447	0.03	0.13	-1.88271	0.00639773	down
ENSG00000287388	0.07	0.27	-1.88266	0.0293922	down
ENSG00000237614	0.02	0.09	-1.88164	0.0294811	down
ENSG00000270019	0.03	0.14	-1.86172	0.0111003	down
ENSG00000249710	0.09	0.33	-1.82216	0.0213082	down
ENSG00000285569	0.02	0.07	-1.81966	0.0042761	down
ENSG00000278655	0.18	0.67	-1.8185	0.00885803	down
ENSG00000287925	0.03	0.1	-1.78281	0.0158469	down
ENSG00000206815	0.32	1.19	-1.76517	0.0441113	down
ENSG00000245552	0.02	0.06	-1.7641	0.0442395	down
ENSG00000241489	0	0.01	-1.76246	0.0444361	down		B3KWA1							-	GO:0004423//iduronate-2-sulfatase activity;GO:0008484//sulfuric ester hydrolase activity	-
ENSG00000238110	0.09	0.33	-1.75519	0.0120755	down
ENSG00000261924	0.05	0.16	-1.7377	0.00196661	down
ENSG00000228470	0.16	0.54	-1.73488	0.00940148	down
ENSG00000237766	0.07	0.25	-1.7335	0.00945904	down
ENSG00000273308	0.13	0.47	-1.72755	0.0308316	down
ENSG00000279894	0.02	0.07	-1.72603	0.0309798	down
ENSG00000270878	0.04	0.13	-1.72527	0.0310546	down
ENSG00000266904	0.04	0.12	-1.71919	0.0074687	down
ENSG00000238009	0.06	0.18	-1.70528	0.00243987	down
ENSG00000282849	0.09	0.31	-1.70193	0.0224153	down
ENSG00000213236	0.08	0.27	-1.70193	0.0224155	down
ENSG00000256195	0.02	0.05	-1.70171	0.0224328	down
ENSG00000286252	0.17	0.59	-1.70136	0.0224604	down
ENSG00000253295	0.08	0.28	-1.68676	0.016605	down	101928093
ENSG00000235319	0.1	0.35	-1.68674	0.0166066	down
ENSG00000227486	0.01	0.03	-1.68534	0.0166974	down
ENSG00000260495	0.03	0.11	-1.66514	0.0099219	down
ENSG00000248388	0.35	1.12	-1.6505	0.0064607	down
ENSG00000272512	0.08	0.25	-1.63642	0.00319086	down
ENSG00000198054	0.24	0.73	-1.63304	0.00237835	down
ENSG00000256039	0.05	0.16	-1.62242	0.0450874	down
ENSG00000239219	0.01	0.02	-1.6218	0.0451687	down
ENSG00000251324	0.11	0.34	-1.62132	0.0452324	down
ENSG00000220937	0.05	0.16	-1.62101	0.0452738	down
ENSG00000237101	0.04	0.14	-1.61559	0.0317576	down
ENSG00000274340	0.04	0.12	-1.61485	0.0318362	down
ENSG00000261235	0.12	0.39	-1.60797	0.0103206	down
ENSG00000250892	0.1	0.31	-1.6076	0.0132603	down
ENSG00000237655	0.22	0.67	-1.60677	0.00668408	down
ENSG00000258766	0.07	0.23	-1.60664	0.00826173	down
ENSG00000287200	0.05	0.15	-1.55633	0.013467	down
ENSG00000260037	0.13	0.39	-1.54468	0.0231928	down
ENSG00000268536	0.16	0.51	-1.54205	0.0310542	down
ENSG00000275329	0.04	0.11	-1.54003	0.0312758	down
ENSG00000272425	0.03	0.09	-1.53855	0.0314385	down
ENSG00000238280	0.1	0.29	-1.53772	0.0315308	down
ENSG00000217950	0.03	0.09	-1.52971	0.0441104	down
ENSG00000225647	0.03	0.09	-1.52568	0.0446714	down
ENSG00000257043	0.12	0.35	-1.52356	0.0449685	down
ENSG00000261204	0.29	0.86	-1.51767	0.0109581	down
ENSG00000284772	0.11	0.34	-1.51566	0.00450607	down		A0A2R8Y6Q2							GO:0030317//flagellated sperm motility;GO:0034220//ion transmembrane transport	GO:0005227//calcium activated cation channel activity	GO:0036128//CatSper complex
ENSG00000287632	0.1	0.29	-1.4998	0.0177912	down
ENSG00000225857	0.72	2.03	-1.48206	0.00146842	down
ENSG00000255693	0.02	0.07	-1.47448	0.0313894	down
ENSG00000227708	0.36	1.01	-1.4735	0.0138621	down
ENSG00000260007	0.05	0.14	-1.47112	0.00765356	down		A0A2R8Y6S5
ENSG00000270316	0.04	0.12	-1.46053	0.0177174	down		A0A0B4J1R7							-	-	GO:0099078//BORC complex
ENSG00000267001	2.59	7.14	-1.45907	0.000332175	down		K7EQS6							GO:0071577//zinc II ion transmembrane transport	GO:0005385//zinc ion transmembrane transporter activity	GO:0005886//plasma membrane;GO:0016021//integral component of membrane
ENSG00000278202	0.09	0.25	-1.45588	0.0435371	down
ENSG00000267565	0.49	1.35	-1.45504	0.00659604	down
ENSG00000267780	0.81	2.2	-1.43334	0.00185004	down
ENSG00000249967	0.05	0.14	-1.43024	0.0303238	down		E9PAM4							GO:0007030//Golgi organization;GO:0007032//endosome organization;GO:0046854//phosphatidylinositol phosphorylation	GO:0004430//1-phosphatidylinositol 4-kinase activity	GO:0005768//endosome;GO:0005802//trans-Golgi network;GO:0005886//plasma membrane
ENSG00000235419	0.34	0.94	-1.42813	0.00778903	down
ENSG00000232938	0.04	0.12	-1.42806	0.0305775	down
ENSG00000223843	0.07	0.19	-1.41503	0.00942059	down
ENSG00000253256	0.18	0.49	-1.40979	0.0226858	down
ENSG00000228192	0.03	0.07	-1.40415	0.0419165	down
ENSG00000230526	0.15	0.42	-1.40368	0.0419853	down
ENSG00000263563	0.06	0.15	-1.40143	0.0423157	down
ENSG00000285864	0.19	0.49	-1.38701	0.0140578	down
ENSG00000287855	0.07	0.19	-1.37582	0.0226452	down
ENSG00000287985	0.08	0.21	-1.36236	0.0403905	down
ENSG00000253471	0.5	1.29	-1.32921	0.0283301	down
ENSG00000260339	0.04	0.1	-1.3277	0.0389884	down
ENSG00000232363	2.16	5.39	-1.3167	0.00137561	down
ENSG00000235072	0.42	1.04	-1.31343	0.00259816	down
ENSG00000286792	0.07	0.18	-1.30377	0.0369237	down
ENSG00000284602	0.15	0.36	-1.27855	0.00852911	down
ENSG00000230337	0.5	1.22	-1.27791	0.0132611	down
ENSG00000262412	0.18	0.45	-1.27683	0.0203366	down
ENSG00000205746	0.11	0.26	-1.27494	0.00322617	down
ENSG00000234880	0.66	1.6	-1.27375	0.00171092	down
ENSG00000251161	0.27	0.65	-1.26774	0.00617363	down
ENSG00000287236	0.12	0.29	-1.25872	0.0344149	down
ENSG00000235217	0.09	0.22	-1.25385	0.00863615	down
ENSG00000286231	0.2	0.49	-1.24338	0.0112205	down
ENSG00000278665	0.16	0.38	-1.24235	0.0479656	down
ENSG00000241095	0.07	0.18	-1.23975	0.048436	down
ENSG00000286180	0.17	0.4	-1.22724	0.0318943	down
ENSG00000252950	1.19	2.82	-1.22477	0.0322415	down
ENSG00000246308	0.05	0.13	-1.22403	0.0454551	down
ENSG00000272104	0.6	1.4	-1.21897	0.0185596	down		U3KQU4
ENSG00000213856	0.24	0.58	-1.21644	0.0234565	down
ENSG00000267278	0.14	0.34	-1.21639	0.0109825	down
ENSG00000263033	0.16	0.38	-1.21142	0.0311734	down
ENSG00000224429	0.14	0.31	-1.20433	0.0149803	down
ENSG00000224728	0.1	0.23	-1.19364	0.0413476	down
ENSG00000273226	1.21	2.74	-1.18225	0.00674231	down
ENSG00000272744	0.44	0.99	-1.16487	0.0209071	down
ENSG00000279443	0.45	0.99	-1.15888	0.00586611	down
ENSG00000214146	0.15	0.34	-1.15677	0.026025	down
ENSG00000260923	0.1	0.23	-1.15568	0.0261665	down
ENSG00000226851	11.15	24.83	-1.15437	0.00265446	down
ENSG00000256050	0.51	1.14	-1.14842	0.00840739	down
ENSG00000285669	0.08	0.19	-1.14769	0.0155414	down
ENSG00000267397	0.17	0.36	-1.14566	0.0245766	down
ENSG00000260101	0.08	0.19	-1.13706	0.0484078	down
ENSG00000255741	0.34	0.76	-1.11587	0.0418746	down
ENSG00000286873	0.65	1.39	-1.10818	0.010887	down
ENSG00000261305	0.29	0.64	-1.10595	0.0199453	down
ENSG00000229388	0.59	1.27	-1.10242	0.0190898	down
ENSG00000277639	0.21	0.46	-1.08943	0.0235331	down		A0A1B0GV96
ENSG00000261886	0.67	1.44	-1.08537	0.0338104	down
ENSG00000232732	0.15	0.32	-1.07855	0.0498831	down
ENSG00000246859	0.15	0.32	-1.07661	0.0115611	down
ENSG00000254143	0.78	1.64	-1.05856	0.023963	down
ENSG00000227536	0.23	0.47	-1.04702	0.02987	down
ENSG00000185065	0.17	0.35	-1.04484	0.0302124	down
ENSG00000257545	0.31	0.63	-1.03472	0.0214063	down
ENSG00000267767	0.13	0.27	-1.02748	0.0433313	down
ENSG00000231971	0.22	0.45	-1.02213	0.0353349	down
ENSG00000280047	0.14	0.28	-1.0008	0.0371819	down
ENSG00000283047	0.58	1.18	-1.00066	0.0316508	down
ENSG00000231066	0.35	0.71	-0.998286	0.046177	down
ENSG00000281039	1.08	2.15	-0.995906	0.0211869	down		M0QZK8
ENSG00000259244	0.72	1.44	-0.978236	0.0431721	down
ENSG00000287691	1.04	2.06	-0.977413	0.0277437	down
ENSG00000245060	0.13	0.26	-0.974494	0.0311444	down
ENSG00000227060	0.25	0.5	-0.965552	0.0384587	down
ENSG00000232485	0.39	0.75	-0.963068	0.0398789	down
ENSG00000251615	0.32	0.62	-0.957156	0.0217414	down
ENSG00000237126	1.4	2.72	-0.953418	0.0174393	down
ENSG00000286677	0.34	0.66	-0.936969	0.0391384	down
ENSG00000273763	0.32	0.62	-0.930279	0.0329832	down
ENSG00000232973	0.41	0.78	-0.918929	0.0272015	down
ENSG00000226549	0.72	1.37	-0.917958	0.0327033	down
ENSG00000271992	1.26	2.39	-0.91754	0.0397404	down
ENSG00000246334	1.84	3.44	-0.90469	0.0265726	down
ENSG00000228653	0.8	1.5	-0.898517	0.0384235	down
ENSG00000286707	0.24	0.44	-0.882195	0.0453866	down
ENSG00000267568	1.17	2.15	-0.876851	0.0434903	down
ENSG00000234771	0.41	0.76	-0.870918	0.0265312	down
ENSG00000272070	0.22	0.4	-0.867146	0.0472675	down
ENSG00000230623	0.57	1.04	-0.85775	0.0404697	down
ENSG00000262136	1.37	2.47	-0.853892	0.0465641	down
ENSG00000260401	1.23	2.18	-0.823017	0.0331396	down
ENSG00000226277	0.72	1.28	-0.817857	0.0418943	down
ENSG00000286064	5.44	9.53	-0.80632	0.0437728	down
ENSG00000285458	1.1	1.91	-0.800118	0.041941	down
ENSG00000255422	3.21	5.49	-0.770907	0.0485331	down
ENSG00000225762	3.92	2.22	0.81991	0.0492417	up
ENSG00000196668	2.01	1.12	0.839863	0.0360525	up
ENSG00000227047	2.1	1.14	0.881139	0.0407467	up
ENSG00000267939	3.73	2.02	0.882127	0.0385873	up
ENSG00000227533	0.79	0.42	0.900623	0.0278358	up
ENSG00000223485	0.76	0.41	0.906572	0.0390121	up
ENSG00000287342	1.18	0.62	0.92456	0.0254926	up	105375118
ENSG00000240914	1.99	1.04	0.928728	0.0352057	up
ENSG00000261286	0.33	0.17	0.951361	0.0366452	up
ENSG00000258919	4.32	2.22	0.959717	0.0198347	up
ENSG00000274922	0.67	0.34	0.97212	0.0196921	up
ENSG00000282885	1.2	0.61	0.977617	0.0207188	up
ENSG00000229525	0.52	0.26	0.983283	0.0364604	up
ENSG00000280739	0.33	0.17	0.988009	0.0244984	up
ENSG00000204620	1.75	0.87	1.00064	0.0294362	up
ENSG00000273156	0.32	0.16	1.00651	0.0440884	up
ENSG00000205086	0.15	0.07	1.00966	0.0492137	up	400950	A0A087WVU8
ENSG00000278238	1.2	0.58	1.03174	0.0358857	up
ENSG00000258057	0.2	0.1	1.03576	0.0379914	up
ENSG00000251000	1.38	0.67	1.03687	0.0411136	up
ENSG00000243224	1.12	0.54	1.05228	0.0177769	up
ENSG00000231793	0.24	0.11	1.0629	0.0344034	up
ENSG00000230102	0.21	0.1	1.06909	0.0365935	up
ENSG00000263917	0.84	0.39	1.08341	0.0424833	up
ENSG00000255136	0.14	0.07	1.08925	0.0299238	up
ENSG00000238005	0.25	0.11	1.09901	0.048409	up
ENSG00000237886	4.49	2.08	1.10647	0.0061892	up
ENSG00000279307	1.2	0.55	1.11974	0.0266545	up
ENSG00000275740	0.3	0.14	1.12603	0.0146016	up		U3KPZ7							GO:0046833//positive regulation of RNA export from nucleus	GO:0003729//mRNA binding	GO:0005634//nucleus
ENSG00000285805	1.24	0.56	1.12904	0.0179146	up
ENSG00000231920	0.78	0.35	1.14263	0.0296524	up
ENSG00000238279	4.15	1.87	1.15114	0.00589701	up
ENSG00000229848	0.74	0.33	1.15769	0.0242011	up
ENSG00000214851	0.24	0.11	1.17364	0.0252033	up
ENSG00000230207	0.34	0.14	1.17819	0.033282	up
ENSG00000264548	0.13	0.05	1.20112	0.049716	up
ENSG00000231705	1.29	0.55	1.20355	0.0353946	up
ENSG00000258982	1.15	0.49	1.20407	0.0353156	up
ENSG00000254027	0.62	0.26	1.20554	0.0350921	up
ENSG00000254008	1.13	0.49	1.20665	0.00749675	up
ENSG00000214279	0.24	0.1	1.21345	0.00735648	up		Q4G0T1							GO:0002456//T cell mediated immunity;GO:0006897//endocytosis;GO:0008150//biological_process	GO:0003674//molecular_function;GO:0005044//scavenger receptor activity	GO:0005737//cytoplasm;GO:0005903//brush border;GO:0009897//external side of plasma membrane;GO:0016021//integral component of membrane
ENSG00000258590	0.12	0.05	1.22191	0.0360874	up
ENSG00000261490	0.1	0.04	1.23616	0.0378304	up
ENSG00000174912	0.66	0.28	1.24022	0.0126834	up
ENSG00000236017	1.43	0.6	1.25537	0.00549694	up
ENSG00000245067	0.11	0.05	1.25667	0.0391117	up
ENSG00000204072	0.67	0.27	1.30711	0.0190202	up
ENSG00000249240	0.22	0.09	1.30837	0.0419984	up		C9J4A7
ENSG00000255439	0.14	0.05	1.3092	0.0308486	up		E9PLN8							GO:0006508//proteolysis;GO:0007596//blood coagulation;GO:0017187//peptidyl-glutamic acid carboxylation;GO:0042373//vitamin K metabolic process;GO:0055114//oxidation-reduction process	GO:0004252//serine-type endopeptidase activity;GO:0047057//vitamin-K-epoxide reductase (warfarin-sensitive) activity	GO:0005783//endoplasmic reticulum;GO:0016021//integral component of membrane
ENSG00000229413	0.91	0.35	1.33588	0.0317008	up
ENSG00000282097	0.41	0.16	1.34155	0.0128146	up
ENSG00000229628	0.46	0.17	1.34201	0.0435571	up
ENSG00000183889	0.08	0.03	1.35756	0.0245496	up		Q9NRE7
ENSG00000250292	0.25	0.1	1.35814	0.0244885	up
ENSG00000230148	0.42	0.16	1.35914	0.0243823	up
ENSG00000226965	0.23	0.09	1.36734	0.0325706	up
ENSG00000261459	0.18	0.07	1.36968	0.0322737	up		B7Z5R0
ENSG00000247498	0.75	0.29	1.37554	0.00227151	up
ENSG00000229873	0.33	0.12	1.3829	0.0452115	up
ENSG00000287009	0.15	0.05	1.38334	0.0451433	up
ENSG00000230267	0.06	0.03	1.40722	0.0331628	up
ENSG00000236829	0.33	0.12	1.41469	0.00752016	up
ENSG00000197358	2.34	0.87	1.4333	0.00043266	up
ENSG00000176761	0.11	0.04	1.43624	0.0465542	up
ENSG00000272795	0.54	0.19	1.43629	0.0465474	up
ENSG00000250230	0.11	0.04	1.46989	0.0251873	up
ENSG00000256982	0.14	0.05	1.47924	0.0194632	up
ENSG00000287331	2.15	0.75	1.50447	0.0018859	up
ENSG00000227733	0.07	0.03	1.50476	0.00977536	up
ENSG00000261659	0.07	0.02	1.52447	0.0251228	up
ENSG00000237522	0.31	0.1	1.54356	0.00943664	up
ENSG00000222020	1.67	0.56	1.55813	0.00193572	up
ENSG00000184224	0.12	0.04	1.58849	0.0144361	up
ENSG00000278973	0.46	0.15	1.58849	0.00904206	up
ENSG00000287029	0.06	0.02	1.59374	0.0247476	up
ENSG00000260792	0.05	0.02	1.59572	0.0340196	up
ENSG00000274813	0.97	0.3	1.5968	0.0338987	up
ENSG00000272647	0.18	0.05	1.60301	0.0478571	up		F8WEM9
ENSG00000268379	0.21	0.07	1.62033	0.00500158	up
ENSG00000260496	0.53	0.17	1.64632	0.0029572	up
ENSG00000285103	0.03	0.01	1.66594	0.018053	up
ENSG00000230122	0.32	0.09	1.66724	0.0179628	up
ENSG00000286938	0.23	0.07	1.68147	0.0241649	up
ENSG00000271040	0.38	0.11	1.6818	0.0241373	up
ENSG00000273998	0.25	0.08	1.68372	0.0239743	up
ENSG00000253766	0.19	0.05	1.70505	0.0331951	up
ENSG00000233893	0.45	0.13	1.70623	0.0330733	up
ENSG00000258633	0.23	0.07	1.70629	0.0330664	up
ENSG00000188459	0.11	0.03	1.70632	0.0330641	up
ENSG00000234707	0.56	0.17	1.71281	0.00115324	up
ENSG00000260782	0.15	0.04	1.71339	0.0103577	up
ENSG00000286686	0.1	0.03	1.71493	0.010288	up
ENSG00000285966	0.17	0.05	1.73112	0.00250633	up
ENSG00000282787	0.41	0.12	1.73363	0.0132214	up
ENSG00000264859	0.06	0.02	1.74161	0.047176	up
ENSG00000250878	0.05	0.01	1.7431	0.0469875	up
ENSG00000257548	0.25	0.07	1.74399	0.0468751	up
ENSG00000213753	0.05	0.02	1.76035	0.00335096	up
ENSG00000215067	0.08	0.02	1.76205	0.0171767	up
ENSG00000256499	0.42	0.12	1.77241	0.0076659	up
ENSG00000257086	0.43	0.12	1.77709	0.00398045	up
ENSG00000259648	0.15	0.04	1.80027	0.00960143	up
ENSG00000258082	0.21	0.05	1.80324	0.0227833	up
ENSG00000251188	0.32	0.08	1.80342	0.0227696	up
ENSG00000253819	0.06	0.01	1.80424	0.0227074	up
ENSG00000285999	0.26	0.07	1.81793	0.00179674	up
ENSG00000234883	0.24	0.06	1.82185	0.00304765	up
ENSG00000215244	0.1	0.02	1.82811	0.00570208	up
ENSG00000178081	0.12	0.03	1.86357	0.031206	up
ENSG00000255193	0.2	0.05	1.86416	0.0311518	up
ENSG00000279022	0.32	0.08	1.86508	0.0310682	up
ENSG00000236144	0.04	0.01	1.8923	0.0157953	up
ENSG00000239332	0.08	0.02	1.89282	0.015766	up
ENSG00000227347	0.13	0.03	1.89368	0.0157175	up
ENSG00000258687	1.06	0.27	1.89419	0.0156894	up
ENSG00000252965	3.48	0.87	1.94034	0.00205855	up
ENSG00000274010	0.09	0.02	1.97118	0.0433224	up
ENSG00000260025	0.28	0.06	1.97126	0.0433143	up
ENSG00000286562	0.17	0.04	1.97127	0.0433135	up
ENSG00000287548	0.08	0.02	1.97184	0.0432534	up
ENSG00000272417	0.34	0.08	1.97594	0.0206465	up
ENSG00000259124	0.24	0.06	1.97601	0.0206425	up
ENSG00000260651	0.31	0.07	1.97637	0.0206192	up
ENSG00000258813	0.2	0.05	1.97805	0.0108783	up
ENSG00000287275	0.08	0.02	1.97884	0.0108456	up
ENSG00000205106	0.3	0.07	1.97983	0.0108053	up
ENSG00000276570	0.06	0.01	1.97989	0.0108031	up
ENSG00000287145	0.09	0.02	1.98019	0.0107908	up
ENSG00000274525	0.98	0.24	1.98262	0.00610193	up
ENSG00000285666	0.1	0.02	2.1167	0.0271943	up
ENSG00000224324	0.44	0.09	2.11688	0.0271813	up
ENSG00000253559	0.2	0.04	2.11753	0.027134	up
ENSG00000248150	0.06	0.01	2.1179	0.0271066	up
ENSG00000273063	0.34	0.07	2.11815	0.0270884	up
ENSG00000272449	0.15	0.03	2.13696	0.00514751	up
ENSG00000268628	0.1	0.02	2.17677	0.00908773	up
ENSG00000272710	2.5	0.53	2.20931	0.000143101	up
ENSG00000248588	0.11	0.02	2.24947	0.0170767	up
ENSG00000232987	0.14	0.02	2.25146	0.0169775	up
ENSG00000233013	0.38	0.08	2.25257	4.81598e-05	up
ENSG00000285649	0.09	0.02	2.26771	0.00604302	up
ENSG00000213683	0.24	0.05	2.26869	0.00602029	up
ENSG00000284987	0.72	0.14	2.33106	0.000234343	up		A0A2R8YE00
ENSG00000267394	0.37	0.07	2.35367	0.00402135	up
ENSG00000200169	1.19	0.2	2.37112	0.0107524	up
ENSG00000268279	0.16	0.03	2.3717	0.0107329	up		V9GY05							GO:0071763//nuclear membrane organization	-	GO:0005639//integral component of nuclear inner membrane;GO:0016020//membrane
ENSG00000266521	0.32	0.05	2.37172	0.0107322	up
ENSG00000256861	0.05	0.01	2.37188	0.0107265	up		H3BMM5
ENSG00000271926	0.22	0.04	2.37236	0.0107101	up
ENSG00000254759	0.3	0.05	2.39015	0.000586067	up
ENSG00000253327	0.13	0.02	2.407	0.00119797	up
ENSG00000228876	0.04	0.01	2.4135	0.0340961	up
ENSG00000286280	0.05	0.01	2.4135	0.0340961	up
ENSG00000275441	0.19	0.03	2.41369	0.0340824	up
ENSG00000236844	0.17	0.02	2.4137	0.0340818	up
ENSG00000263494	0.42	0.06	2.41376	0.0340769	up
ENSG00000273399	0.14	0.02	2.41403	0.0340576	up
ENSG00000272662	0.16	0.02	2.41409	0.0340525	up
ENSG00000286288	0.02	0	2.4141	0.0340519	up
ENSG00000267228	0.05	0.01	2.41416	0.034048	up		R4GN61							GO:0006888//ER to Golgi vesicle-mediated transport	-	GO:0005789//endoplasmic reticulum membrane;GO:0030134//ER to Golgi transport vesicle;GO:0030173//integral component of Golgi membrane
ENSG00000225671	0.13	0.02	2.41426	0.0340405	up
ENSG00000232139	0.04	0.01	2.41433	0.0340354	up
ENSG00000236366	0.04	0.01	2.41439	0.0340309	up
ENSG00000280013	0.39	0.06	2.41454	0.0340201	up
ENSG00000287506	0.14	0.02	2.4147	0.0340079	up
ENSG00000240625	0.26	0.04	2.41487	0.0339959	up
ENSG00000250107	0.06	0.01	2.41494	0.0339908	up
ENSG00000229356	0.19	0.03	2.48324	0.00679596	up	100861510
ENSG00000257062	0.25	0.04	2.48394	0.00677975	up		K7EJF2							GO:0015721//bile acid and bile salt transport;GO:0043252//sodium-independent organic anion transport;GO:0055085//transmembrane transport	GO:0015125//bile acid transmembrane transporter activity;GO:0015347//sodium-independent organic anion transmembrane transporter activity	GO:0005887//integral component of plasma membrane;GO:0016020//membrane;GO:0016021//integral component of membrane
ENSG00000099725	0.02	0	2.48418	0.00677439	up	5616	A0A024R177							GO:0006468//protein phosphorylation;GO:0007165//signal transduction;GO:0018105//peptidyl-serine phosphorylation	GO:0004674//protein serine/threonine kinase activity;GO:0004691//cAMP-dependent protein kinase activity;GO:0005524//ATP binding	GO:0005829//cytosol;GO:0005952//cAMP-dependent protein kinase complex
ENSG00000274570	0.08	0.01	2.58706	0.00431586	up
ENSG00000237008	0.23	0.03	2.58724	0.00431296	up
ENSG00000285190	0.07	0.01	2.58758	0.00430766	up
ENSG00000234537	0.05	0.01	2.59682	0.0197082	up
ENSG00000232872	0.04	0	2.59719	0.0196907	up
ENSG00000243504	0.21	0.03	2.59764	0.0196693	up
ENSG00000287964	0.06	0.01	2.59776	0.0196632	up
ENSG00000234768	0.21	0.03	2.59809	0.0196478	up
ENSG00000237292	0.32	0.04	2.68631	0.00272716	up
ENSG00000224067	0.61	0.08	2.71924	0.000551902	up
ENSG00000286109	0.1	0.01	2.7594	0.01148	up
ENSG00000272342	0.18	0.02	2.75958	0.0114744	up
ENSG00000273199	0.12	0.01	2.76017	0.0114563	up
ENSG00000230523	0.05	0.01	2.7605	0.0114458	up
ENSG00000237687	0.31	0.03	2.76068	0.0114404	up
ENSG00000259130	0.16	0.02	2.76114	0.0114264	up
ENSG00000204529	0.09	0.01	2.77557	0.001757	up
ENSG00000260128	0.33	0.04	2.7811	0.000377389	up
ENSG00000238077	0.13	0.01	2.90642	0.00672099	up
ENSG00000271741	0.04	0	2.90696	0.00671032	up
ENSG00000248884	0.31	0.03	3.03851	0.00398298	up
ENSG00000277987	0.07	0.01	3.03905	0.00397599	up
ENSG00000258096	0.2	0.02	3.03978	0.00396679	up
ENSG00000248954	0.08	0.01	3.16032	0.00237229	up
ENSG00000237471	0.11	0.01	3.16152	0.00236258	up
ENSG00000253123	0.03	0	3.27211	0.00142692	up	100507403
ENSG00000260572	0.15	0.01	3.28959	8.83576e-05	up
ENSG00000179031	0.06	0	3.53885	0.0217538	up
ENSG00000224533	0.03	0	3.53885	0.0217538	up
ENSG00000234415	0.06	0	3.53885	0.0217538	up
ENSG00000286806	0.05	0	3.53885	0.0217538	up
ENSG00000214617	0.01	0	3.53899	0.0217492	up
ENSG00000260628	0.03	0	3.53899	0.0217492	up
ENSG00000235907	0.06	0	3.53907	0.0217467	up
ENSG00000234030	0.1	0	3.53914	0.0217445	up
ENSG00000235052	0.1	0	3.53914	0.0217445	up
ENSG00000277125	0.07	0	3.53914	0.0217445	up
ENSG00000214465	0.04	0	3.53921	0.0217421	up
ENSG00000234928	0.05	0	3.53921	0.0217421	up
ENSG00000255303	0.01	0	3.53921	0.0217421	up
ENSG00000262902	0.08	0	3.53928	0.0217399	up
ENSG00000275875	0.13	0	3.53928	0.0217399	up
ENSG00000253308	0.06	0	3.53929	0.0217396	up
ENSG00000275157	0.38	0	3.53929	0.0217396	up
ENSG00000228021	0.01	0	3.53935	0.0217374	up
ENSG00000280331	0.26	0	3.53935	0.0217374	up
ENSG00000284601	0.03	0	3.53935	0.0217374	up
ENSG00000018607	0.03	0	3.53942	0.0217352	up
ENSG00000177406	0.02	0	3.53942	0.0217352	up
ENSG00000196534	0.01	0	3.53942	0.0217352	up
ENSG00000218359	0.17	0	3.53942	0.0217352	up
ENSG00000230936	0.02	0	3.53942	0.0217352	up
ENSG00000249099	0.09	0	3.53942	0.0217352	up
ENSG00000268199	0.08	0	3.53942	0.0217352	up
ENSG00000287561	0.07	0	3.53943	0.0217349	up
ENSG00000225536	0.03	0	3.53949	0.0217328	up
ENSG00000226057	0.02	0	3.53949	0.0217328	up
ENSG00000240803	0.17	0	3.53949	0.0217328	up
ENSG00000228560	0.05	0	3.53957	0.0217303	up
ENSG00000251665	0.06	0	3.53957	0.0217303	up
ENSG00000267614	0.19	0	3.53965	0.0217278	up
ENSG00000185837	0.08	0	3.53972	0.0217254	up
ENSG00000187589	0.04	0	3.53972	0.0217254	up
ENSG00000214748	0.59	0	3.53972	0.0217254	up
ENSG00000228768	0.1	0	3.53972	0.0217254	up
ENSG00000232829	0.06	0	3.53972	0.0217254	up
ENSG00000248583	0.07	0	3.53972	0.0217254	up
ENSG00000255470	0.05	0	3.53972	0.0217254	up
ENSG00000268509	0.04	0	3.53972	0.0217254	up
ENSG00000270938	0.07	0	3.53972	0.0217254	up
ENSG00000285552	0.05	0	3.53972	0.0217254	up
ENSG00000285729	0.06	0	3.53972	0.0217254	up
ENSG00000280057	0.03	0	3.83585	0.0107249	up
ENSG00000249001	0.07	0	3.83592	0.0107237	up
ENSG00000287115	0.1	0	3.83599	0.0107222	up
ENSG00000253901	0.1	0	3.83606	0.010721	up
ENSG00000224679	0.15	0	3.83619	0.0107183	up
ENSG00000226320	0.04	0	3.83619	0.0107183	up	101928114
ENSG00000230845	0.1	0	3.83619	0.0107183	up
ENSG00000250103	0.12	0	3.83619	0.0107183	up
ENSG00000234520	0.03	0	3.83627	0.0107169	up
ENSG00000287423	0.03	0	3.83628	0.0107167	up
ENSG00000197251	0.03	0	3.83633	0.0107156	up
ENSG00000211642	0.16	0	3.83633	0.0107156	up		A0A1W2PQ80							GO:0002250//adaptive immune response;GO:0002377//immunoglobulin production;GO:0006955//immune response	-	GO:0005615//extracellular space;GO:0005886//plasma membrane;GO:0019814//immunoglobulin complex
ENSG00000233643	0.11	0	3.83633	0.0107156	up
ENSG00000287318	0.02	0	3.83633	0.0107156	up
ENSG00000230987	0.02	0	3.83641	0.0107142	up
ENSG00000260394	0.05	0	3.83655	0.0107113	up
ENSG00000229586	0.02	0	3.83663	0.0107099	up
ENSG00000285545	0.05	0	3.83663	0.0107099	up
ENSG00000197503	0.03	0	3.8367	0.0107085	up
ENSG00000282863	0.12	0	4.08165	0.00543808	up
ENSG00000226261	0.1	0	4.08178	0.00543655	up
ENSG00000286817	0.06	0	4.08191	0.00543501	up
ENSG00000225101	0.03	0	4.08232	0.0054304	up
ENSG00000242209	0.17	0	4.08232	0.0054304	up
ENSG00000225105	0.23	0	4.08239	0.00542958	up
ENSG00000224800	0.16	0	4.08281	0.00542478	up
ENSG00000232077	0.05	0	4.08281	0.00542478	up
ENSG00000265630	0.4	0	4.29245	0.00281494	up
ENSG00000149656	0.09	0	4.29246	0.00281488	up
ENSG00000235531	0.01	0	4.29265	0.00281359	up
ENSG00000219565	0.02	0	4.47505	0.00149132	up
ENSG00000280243	0.09	0	4.47505	0.00149132	up
ENSG00000219702	0.31	0	4.47556	0.00148929	up
ENSG00000231700	0.17	0	4.47556	0.00148929	up
ENSG00000213104	0.11	0	4.47576	0.00148851	up
ENSG00000286417	0.13	0	4.47608	0.00148723	up
ENSG00000214199	0.09	0	4.78447	0.000438043	up
ENSG00000269153	0.19	0	4.9176	0.000242665	up
ENSG00000230676	0.07	0	4.9177	0.000242579	up
ENSG00000215914	0.13	0	5.03805	0.000136989	up
ENSG00000262075	0.05	0	5.89321	7.83493e-07	up
